# Supplementary material for: Kinetics of CF3CH2OCH3 (HFE-263fb2), CHF2CF2CH2OCH3 (HFE-374pcf), and CF3CF2CH2OCH3 (HFE-365mcf3) with OH radicals, IR absorption cross sections, and global warming potentials
Source: Royal Society of Chemistry journal article supplement (doi:10.1039/d2cp00160h), 2022-01-01
Supplement: d2cp00160h2.xlsx [file d2cp00160h2.xlsx]

## Sheet: IR Absorption cross sections
	CF3CH2OCH3 (HFE-263fb2)		CHF2CF2CH2OCH3 (HFE-374pcf)		CF3CF2CH2OCH3 (HFE-365mcf3)
	(base e)	Uncertainty (±2σ)	(base e)	Uncertainty (±2σ)	(base e)	Uncertainty (±2σ)
cm-1	cm2 molecule-1	cm2 molecule-1	cm2 molecule-1	cm2 molecule-1	cm2 molecule-1	cm2 molecule-1
520	2.65699e-20	4.20976e-21	2.94549e-20	2.69019e-21	8.36587e-20	1.20071e-20
521	2.0705e-20	2.84844e-21	2.63346e-20	1.59592e-21	7.74144e-20	1.28389e-20
522	1.85984e-20	1.86218e-21	2.69875e-20	1.70059e-21	7.82214e-20	1.27053e-20
523	1.87165e-20	1.98669e-21	2.87545e-20	1.38628e-21	8.57415e-20	1.01993e-20
524	1.96099e-20	1.71372e-21	2.78141e-20	1.8211e-21	8.71972e-20	9.79731e-21
525	1.95538e-20	1.76525e-21	2.87457e-20	1.45968e-21	8.75256e-20	7.25463e-21
526	2.12284e-20	2.68931e-21	3.52437e-20	2.97174e-21	9.96525e-20	8.97292e-21
527	2.01767e-20	2.08169e-21	3.38101e-20	2.00723e-21	8.73961e-20	9.46568e-21
528	1.99256e-20	1.9263e-21	3.72785e-20	3.48243e-21	8.91922e-20	1.06778e-20
529	2.00749e-20	1.46606e-21	3.72644e-20	2.13112e-21	9.32704e-20	8.15187e-21
530	1.99503e-20	1.28122e-21	3.88027e-20	2.30952e-21	9.27367e-20	7.83807e-21
531	2.01751e-20	1.61545e-21	4.18054e-20	1.7708e-21	9.0285e-20	5.19336e-21
532	2.20339e-20	1.83676e-21	4.45054e-20	2.34454e-21	8.8376e-20	7.55799e-21
533	2.25952e-20	1.91772e-21	4.66398e-20	3.13808e-21	8.84398e-20	7.87138e-21
534	2.38053e-20	2.02524e-21	4.77139e-20	3.3519e-21	8.2761e-20	8.01592e-21
535	2.5033e-20	1.6605e-21	5.06597e-20	2.15948e-21	7.77139e-20	9.23506e-21
536	2.70659e-20	1.91127e-21	5.5089e-20	2.03387e-21	7.2217e-20	8.41062e-21
537	2.88017e-20	2.02009e-21	6.16334e-20	2.34637e-21	7.11774e-20	1.07183e-20
538	2.9589e-20	1.746e-21	6.92165e-20	3.53069e-21	6.38884e-20	6.37425e-21
539	3.02988e-20	1.40446e-21	7.78183e-20	3.38793e-21	5.95306e-20	5.87478e-21
540	3.19371e-20	1.45139e-21	8.62505e-20	3.34752e-21	5.38451e-20	6.10569e-21
541	3.25535e-20	1.12395e-21	1.04004e-19	3.65468e-21	4.75598e-20	7.30465e-21
542	3.38836e-20	1.34556e-21	1.1608e-19	3.77896e-21	4.7118e-20	4.67194e-21
543	3.43849e-20	1.3274e-21	1.26802e-19	3.81467e-21	3.93394e-20	4.13932e-21
544	3.50267e-20	1.33601e-21	1.34908e-19	3.83676e-21	3.71011e-20	4.40726e-21
545	3.6032e-20	1.34281e-21	1.41868e-19	3.85617e-21	3.65572e-20	4.88811e-21
546	3.89003e-20	1.52391e-21	1.46655e-19	4.03503e-21	3.0975e-20	3.50594e-21
547	4.06024e-20	1.37938e-21	1.47185e-19	3.77329e-21	2.90672e-20	4.79145e-21
548	4.20141e-20	1.45906e-21	1.48317e-19	3.64402e-21	2.89415e-20	3.52796e-21
549	4.13755e-20	1.24491e-21	1.51396e-19	3.62469e-21	2.65142e-20	4.68846e-21
550	4.12182e-20	1.37714e-21	1.67734e-19	3.89272e-21	2.61858e-20	5.05775e-21
551	4.04647e-20	1.1864e-21	1.49709e-19	3.79734e-21	2.56974e-20	6.00778e-21
552	3.89074e-20	1.00237e-21	1.34937e-19	3.78611e-21	2.44518e-20	4.75856e-21
553	3.74864e-20	1.03462e-21	1.32549e-19	3.26801e-21	2.36344e-20	4.87434e-21
554	3.63349e-20	1.15992e-21	1.30447e-19	3.5818e-21	2.14054e-20	4.84304e-21
555	3.50751e-20	1.05601e-21	1.22946e-19	3.79949e-21	2.30363e-20	4.64598e-21
556	3.42246e-20	9.62163e-22	1.11058e-19	3.45923e-21	2.09396e-20	4.46478e-21
557	3.28883e-20	9.91779e-22	9.67838e-20	3.49126e-21	2.11772e-20	4.11443e-21
558	3.05899e-20	9.30245e-22	8.07359e-20	3.46155e-21	2.07998e-20	4.77155e-21
559	2.84122e-20	8.04236e-22	6.6238e-20	3.33438e-21	1.92973e-20	5.11944e-21
560	2.64868e-20	7.14025e-22	5.36598e-20	3.1662e-21	2.07118e-20	4.57164e-21
561	2.46289e-20	7.70499e-22	4.2894e-20	3.0911e-21	1.78688e-20	4.2761e-21
562	2.28534e-20	9.10708e-22	3.49209e-20	3.13839e-21	1.66343e-20	4.60657e-21
563	2.10592e-20	9.31264e-22	2.88979e-20	3.18895e-21	1.7322e-20	4.35715e-21
564	1.90167e-20	9.16328e-22	2.41023e-20	3.00719e-21	1.82304e-20	3.80506e-21
565	1.67064e-20	7.7986e-22	2.02908e-20	3.10834e-21	1.91873e-20	5.05622e-21
566	1.52391e-20	7.88887e-22	1.76912e-20	3.14949e-21	1.8264e-20	4.63346e-21
567	1.41868e-20	1.0187e-21	1.6069e-20	3.24037e-21	1.79232e-20	3.98626e-21
568	1.25666e-20	1.1003e-21	1.44412e-20	3.20954e-21	1.8841e-20	3.72842e-21
569	1.13416e-20	1.17959e-21	1.42703e-20	3.6215e-21	2.01272e-20	4.82963e-21
570	9.93784e-21	9.72682e-22	1.30278e-20	3.50673e-21	1.99738e-20	5.3989e-21
571	9.2932e-21	1.04989e-21	1.21559e-20	3.41439e-21	1.94748e-20	4.92291e-21
572	8.05619e-21	9.07405e-22	1.17132e-20	3.18618e-21	1.86005e-20	4.48322e-21
573	6.85098e-21	6.70877e-22	1.16562e-20	3.02332e-21	1.89482e-20	4.03852e-21
574	6.33657e-21	6.69335e-22	1.21158e-20	3.12679e-21	1.88935e-20	4.2842e-21
575	5.76007e-21	6.87932e-22	1.27844e-20	3.24899e-21	1.89696e-20	4.00174e-21
576	6.41508e-21	1.33526e-21	1.48443e-20	4.03772e-21	2.05723e-20	4.79972e-21
577	5.51787e-21	1.08928e-21	1.45791e-20	3.69866e-21	1.93211e-20	3.9195e-21
578	4.28723e-21	5.38918e-22	1.40924e-20	3.08809e-21	1.84659e-20	3.85938e-21
579	4.28003e-21	6.22993e-22	1.5053e-20	2.99218e-21	1.88174e-20	3.28428e-21
580	3.76561e-21	6.54523e-22	1.67794e-20	3.24282e-21	2.07845e-20	3.93825e-21
581	4.27711e-21	1.07779e-21	2.09991e-20	3.70506e-21	2.25731e-20	4.12324e-21
582	2.95771e-21	4.18502e-22	2.24405e-20	3.19123e-21	2.18253e-20	3.56285e-21
583	2.63176e-21	3.88159e-22	2.51706e-20	3.11703e-21	2.32269e-20	3.78181e-21
584	2.5052e-21	5.64205e-22	2.8964e-20	3.37263e-21	2.35462e-20	3.78733e-21
585	3.1694e-21	9.54994e-22	3.27476e-20	3.65733e-21	2.36814e-20	3.64821e-21
586	2.48391e-21	5.24882e-22	3.56902e-20	3.50592e-21	2.49482e-20	3.44346e-21
587	2.02975e-21	4.07125e-22	3.82588e-20	3.41996e-21	2.76513e-20	4.14695e-21
588	2.13324e-21	4.31109e-22	4.13719e-20	3.29061e-21	2.79858e-20	3.49928e-21
589	1.89247e-21	3.75393e-22	4.45984e-20	3.33906e-21	2.77087e-20	3.3726e-21
590	1.81038e-21	4.83435e-22	4.90563e-20	3.46631e-21	2.78605e-20	3.62331e-21
591	1.89311e-21	6.00318e-22	5.43307e-20	3.47467e-21	2.89247e-20	3.62294e-21
592	3.08743e-21	1.37793e-21	5.91488e-20	4.36541e-21	3.11676e-20	4.10021e-21
593	2.01724e-21	7.40308e-22	5.79997e-20	3.8242e-21	2.98937e-20	3.53892e-21
594	1.34459e-21	3.38e-22	5.81709e-20	3.48573e-21	2.92168e-20	3.22028e-21
595	1.5653e-21	5.68937e-22	6.04071e-20	3.66826e-21	2.83006e-20	3.52536e-21
596	1.18803e-21	4.16206e-22	6.07887e-20	3.6959e-21	2.89961e-20	3.44187e-21
597	9.36562e-22	4.25408e-22	5.9955e-20	3.63628e-21	2.98172e-20	3.18606e-21
598	7.61389e-22	3.07219e-22	5.83222e-20	3.48493e-21	3.06032e-20	3.04095e-21
599	8.16556e-22	3.48793e-22	5.66886e-20	3.48634e-21	3.07485e-20	2.96675e-21
600	1.92639e-21	9.68339e-22	5.50899e-20	3.83709e-21	3.11715e-20	3.45283e-21
601	1.40824e-21	6.96558e-22	5.00155e-20	3.6796e-21	3.13827e-20	3.14394e-21
602	7.66785e-22	4.1452e-22	4.53714e-20	3.52267e-21	3.21959e-20	3.29324e-21
603	7.9755e-22	4.30911e-22	4.21896e-20	3.52887e-21	3.40545e-20	3.20081e-21
604	7.77857e-22	4.77431e-22	3.92818e-20	3.6221e-21	3.60486e-20	3.36494e-21
605	8.22955e-22	5.09008e-22	3.59918e-20	3.63924e-21	3.73165e-20	3.02709e-21
606	4.66589e-22	3.31401e-22	3.24829e-20	3.53668e-21	3.99379e-20	2.91343e-21
607	6.66659e-22	3.59508e-22	2.88756e-20	3.56929e-21	4.29366e-20	3.3491e-21
608	8.05863e-22	4.08217e-22	2.30191e-20	3.45652e-21	4.93101e-20	3.70734e-21
609	7.74718e-22	4.40299e-22	2.02241e-20	3.56069e-21	5.44288e-20	3.20077e-21
610	9.36177e-22	4.64308e-22	1.74669e-20	3.62897e-21	5.94589e-20	2.89179e-21
611	8.45991e-22	4.27014e-22	1.5366e-20	3.4736e-21	6.54975e-20	2.76895e-21
612	9.25321e-22	4.31276e-22	1.36573e-20	3.40537e-21	7.32041e-20	3.15884e-21
613	6.60091e-22	3.56554e-22	1.19711e-20	3.66558e-21	8.02746e-20	3.66712e-21
614	6.46487e-22	3.27793e-22	1.07785e-20	3.60482e-21	8.68998e-20	3.51345e-21
615	6.34645e-22	3.03296e-22	1.00849e-20	3.55037e-21	9.50616e-20	3.36794e-21
616	1.17898e-21	6.09266e-22	1.02697e-20	3.94591e-21	1.02425e-19	3.50124e-21
617	1.25208e-21	6.11034e-22	9.38764e-21	3.82285e-21	1.10158e-19	3.45557e-21
618	1.71259e-21	7.26911e-22	8.57597e-21	3.63661e-21	1.17043e-19	3.59686e-21
619	1.12168e-21	3.79712e-22	8.02681e-21	3.64744e-21	1.22047e-19	3.84386e-21
620	9.68103e-22	2.09093e-22	7.86667e-21	3.60768e-21	1.23485e-19	3.89743e-21
621	1.1503e-21	3.06597e-22	7.91716e-21	3.70855e-21	1.24497e-19	3.81873e-21
622	9.10959e-22	1.64795e-22	7.46419e-21	3.69103e-21	1.23766e-19	3.70928e-21
623	8.93715e-22	1.54025e-22	7.16415e-21	3.59197e-21	1.22924e-19	3.76653e-21
624	1.2143e-21	1.93022e-22	7.1596e-21	3.68083e-21	1.20622e-19	3.80327e-21
625	1.62274e-21	4.67749e-22	7.80396e-21	4.055e-21	1.16854e-19	3.4993e-21
626	1.36718e-21	3.1537e-22	7.27847e-21	3.84016e-21	1.09428e-19	3.37949e-21
627	9.95532e-22	1.05548e-22	6.80989e-21	3.64364e-21	1.02687e-19	3.38672e-21
628	1.06016e-21	1.28503e-22	6.96177e-21	3.71707e-21	9.61873e-20	3.39103e-21
629	1.20109e-21	1.23385e-22	6.79465e-21	3.73023e-21	8.87319e-20	3.1624e-21
630	1.299e-21	1.16328e-22	6.67954e-21	3.70349e-21	8.04338e-20	3.02244e-21
631	1.60465e-21	2.09921e-22	6.68402e-21	3.79973e-21	7.23128e-20	2.77163e-21
632	1.53842e-21	1.43506e-22	6.32494e-21	3.70759e-21	6.37595e-20	2.74475e-21
633	2.09824e-21	3.72581e-22	7.02195e-21	3.91459e-21	5.61817e-20	3.06278e-21
634	2.22926e-21	3.92354e-22	7.03911e-21	3.89067e-21	4.96214e-20	3.15125e-21
635	2.3768e-21	3.43509e-22	7.10796e-21	3.92856e-21	4.44549e-20	3.03115e-21
636	2.88996e-21	4.82287e-22	7.65275e-21	4.02132e-21	3.86422e-20	2.90909e-21
637	2.68351e-21	2.80514e-22	7.44853e-21	3.87803e-21	3.64408e-20	2.79605e-21
638	2.97409e-21	2.92419e-22	7.86508e-21	3.86782e-21	3.55458e-20	2.79436e-21
639	3.32127e-21	2.97012e-22	8.13795e-21	3.83485e-21	3.52749e-20	2.85277e-21
640	4.21291e-21	5.97727e-22	8.71413e-21	3.95613e-21	3.57601e-20	2.80612e-21
641	4.53642e-21	4.2599e-22	8.95122e-21	3.85162e-21	3.70316e-20	2.73642e-21
642	5.19206e-21	3.81178e-22	9.40558e-21	3.79653e-21	3.92579e-20	2.8735e-21
643	6.14305e-21	4.69806e-22	9.86596e-21	3.79319e-21	4.17081e-20	2.92451e-21
644	7.08739e-21	4.46561e-22	1.03902e-20	3.89391e-21	4.38989e-20	3.12332e-21
645	8.55641e-21	5.61434e-22	1.06919e-20	3.86965e-21	4.50796e-20	4.22376e-21
646	9.82367e-21	5.20149e-22	1.0687e-20	3.78754e-21	4.91554e-20	3.19963e-21
647	1.16732e-20	4.50367e-22	1.11154e-20	3.97416e-21	5.24483e-20	2.87811e-21
648	1.45849e-20	7.41679e-22	1.18078e-20	3.98001e-21	5.62415e-20	2.92714e-21
649	1.8947e-20	8.64314e-22	1.31346e-20	3.93491e-21	6.16592e-20	2.91279e-21
650	2.22111e-20	6.88856e-22	1.38465e-20	3.98498e-21	6.45329e-20	2.88201e-21
651	2.64876e-20	6.84862e-22	1.34972e-20	3.99328e-21	6.78776e-20	2.79618e-21
652	3.18665e-20	8.86109e-22	1.34157e-20	4.04334e-21	7.19244e-20	3.03407e-21
653	3.77108e-20	8.19809e-22	1.37212e-20	4.02419e-21	7.51107e-20	3.03196e-21
654	4.48218e-20	8.3931e-22	1.41134e-20	3.97648e-21	7.74954e-20	2.99601e-21
655	5.26209e-20	9.05427e-22	1.50341e-20	4.12513e-21	7.94932e-20	2.93301e-21
656	6.13521e-20	8.1484e-22	1.58047e-20	4.07436e-21	8.1643e-20	3.01497e-21
657	7.16057e-20	9.75899e-22	1.63126e-20	4.0266e-21	8.38461e-20	3.10479e-21
658	8.16872e-20	9.5823e-22	1.69537e-20	4.04114e-21	8.61478e-20	3.0049e-21
659	9.24724e-20	1.03328e-21	1.78884e-20	4.19691e-21	8.83912e-20	3.01738e-21
660	1.03112e-19	1.22844e-21	1.89822e-20	4.32243e-21	9.08169e-20	3.20828e-21
661	1.11817e-19	9.70678e-22	1.99427e-20	4.12595e-21	9.33248e-20	3.09767e-21
662	1.19253e-19	1.00937e-21	2.13825e-20	3.98797e-21	9.62107e-20	3.07724e-21
663	1.26951e-19	1.09553e-21	2.46056e-20	4.0646e-21	1.00918e-19	3.10108e-21
664	1.30626e-19	9.46943e-22	2.72048e-20	4.06674e-21	1.03861e-19	3.06033e-21
665	1.38494e-19	8.96968e-22	3.00647e-20	4.04865e-21	1.07825e-19	3.06736e-21
666	1.54146e-19	1.01886e-21	3.33269e-20	4.11985e-21	1.12274e-19	3.35111e-21
667	1.69093e-19	1.63831e-21	3.74554e-20	4.77325e-21	1.18052e-19	3.79555e-21
668	1.94924e-19	7.45011e-21	4.59504e-20	5.76661e-21	1.40834e-19	6.6663e-21
669	1.77951e-19	6.64671e-21	4.89656e-20	4.58866e-21	1.34057e-19	4.63383e-21
670	1.60832e-19	2.81949e-21	5.22048e-20	4.43908e-21	1.29324e-19	3.84819e-21
671	1.53374e-19	1.54187e-21	5.81187e-20	4.39519e-21	1.2772e-19	3.68487e-21
672	1.52168e-19	1.36066e-21	6.59795e-20	4.30808e-21	1.26005e-19	3.55531e-21
673	1.54054e-19	1.41623e-21	7.4162e-20	4.40357e-21	1.24533e-19	3.37626e-21
674	1.56019e-19	1.32483e-21	8.17076e-20	4.39553e-21	1.22418e-19	3.40486e-21
675	1.56079e-19	1.53587e-21	8.96404e-20	4.45321e-21	1.20832e-19	3.44285e-21
676	1.42553e-19	1.49572e-21	1.00395e-19	4.43996e-21	1.15482e-19	3.36789e-21
677	1.28322e-19	1.25397e-21	1.0598e-19	4.5475e-21	1.064e-19	3.27321e-21
678	1.16803e-19	1.3174e-21	1.10814e-19	4.55557e-21	9.85369e-20	3.11638e-21
679	1.07058e-19	1.37748e-21	1.16739e-19	4.73077e-21	9.36959e-20	3.07012e-21
680	9.62141e-20	1.11374e-21	1.25522e-19	4.69671e-21	8.82643e-20	2.89253e-21
681	8.60292e-20	1.27525e-21	1.28382e-19	4.77564e-21	8.22008e-20	2.87778e-21
682	7.50673e-20	1.06518e-21	1.29913e-19	4.80107e-21	7.51433e-20	2.81823e-21
683	6.38738e-20	1.04809e-21	1.35121e-19	4.7483e-21	6.66716e-20	2.79056e-21
684	5.40913e-20	1.0333e-21	1.39271e-19	4.85651e-21	5.92188e-20	2.69641e-21
685	4.41042e-20	7.79463e-22	1.41265e-19	4.78845e-21	5.14041e-20	2.56305e-21
686	3.63125e-20	9.78938e-22	1.43851e-19	4.8479e-21	4.50469e-20	2.59347e-21
687	2.91909e-20	8.05249e-22	1.46627e-19	4.93888e-21	3.95501e-20	2.59792e-21
688	2.34457e-20	9.17913e-22	1.49333e-19	4.97729e-21	3.48212e-20	2.6182e-21
689	1.90901e-20	1.01701e-21	1.51072e-19	5.19882e-21	3.14695e-20	2.62785e-21
690	1.35285e-20	7.79726e-22	1.50019e-19	5.04854e-21	2.72058e-20	2.68395e-21
691	1.06941e-20	5.67311e-22	1.47589e-19	4.94095e-21	2.44637e-20	2.69748e-21
692	8.73307e-21	6.35405e-22	1.4461e-19	4.97087e-21	2.29747e-20	2.62877e-21
693	6.92118e-21	4.80726e-22	1.41019e-19	4.94329e-21	2.14602e-20	2.53683e-21
694	5.93232e-21	6.47354e-22	1.37582e-19	4.9795e-21	2.04645e-20	2.58453e-21
695	4.82387e-21	5.19142e-22	1.34766e-19	4.93445e-21	1.94144e-20	2.61566e-21
696	3.87148e-21	4.16089e-22	1.33639e-19	4.92241e-21	1.84013e-20	2.52275e-21
697	3.27979e-21	4.83447e-22	1.33718e-19	5.0048e-21	1.79058e-20	2.57135e-21
698	2.79288e-21	4.72168e-22	1.29907e-19	5.02723e-21	1.72272e-20	2.56184e-21
699	2.28172e-21	4.33042e-22	1.20136e-19	4.90973e-21	1.67465e-20	2.60186e-21
700	1.63082e-21	2.99271e-22	1.10156e-19	4.79425e-21	1.64625e-20	2.52317e-21
701	1.319e-21	2.64092e-22	1.03161e-19	4.70245e-21	1.60475e-20	2.62677e-21
702	1.08617e-21	2.59279e-22	9.76733e-20	4.75981e-21	1.57848e-20	2.60102e-21
703	8.37644e-22	2.69308e-22	8.79268e-20	4.8458e-21	1.54139e-20	2.53675e-21
704	6.42538e-22	2.67457e-22	7.99333e-20	4.84965e-21	1.55115e-20	2.65457e-21
705	6.94333e-22	3.3183e-22	7.14283e-20	4.85678e-21	1.53605e-20	2.64406e-21
706	4.68788e-22	2.83888e-22	6.23725e-20	4.7654e-21	1.50962e-20	2.60064e-21
707	1.7785e-22	2.1212e-22	5.37471e-20	4.74755e-21	1.50596e-20	2.56111e-21
708	3.34315e-23	1.79415e-22	4.57042e-20	4.68802e-21	1.52586e-20	2.57122e-21
709	3.00656e-23	2.00564e-22	3.86356e-20	4.60668e-21	1.56419e-20	2.59266e-21
710	3.54558e-23	2.04948e-22	3.26969e-20	4.6071e-21	1.58532e-20	2.52586e-21
711	8.11259e-23	1.86919e-22	2.76566e-20	4.61674e-21	1.6291e-20	2.34778e-21
712	2.0574e-22	1.90179e-22	2.37287e-20	4.61768e-21	1.72121e-20	2.47822e-21
713	2.8784e-22	1.94515e-22	2.07224e-20	4.68858e-21	1.84432e-20	2.61547e-21
714	2.7216e-22	2.36915e-22	1.82738e-20	4.75716e-21	1.9904e-20	2.57573e-21
715	4.31816e-22	1.6125e-22	1.62561e-20	4.69903e-21	2.19798e-20	2.56119e-21
716	4.0833e-22	1.64191e-22	1.4705e-20	4.6878e-21	2.50835e-20	2.56051e-21
717	4.90425e-22	1.52814e-22	1.31493e-20	4.71985e-21	3.23646e-20	2.46985e-21
718	3.76235e-22	2.11795e-22	1.24387e-20	4.75766e-21	3.98519e-20	2.52053e-21
719	3.21406e-22	3.38785e-22	1.19731e-20	4.85294e-21	5.02463e-20	2.49948e-21
720	1.59656e-22	6.37719e-22	1.1609e-20	4.95484e-21	6.3536e-20	2.66251e-21
721	7.76492e-23	6.07889e-22	1.11311e-20	4.89276e-21	7.86507e-20	2.8148e-21
722	5.21494e-22	2.40877e-22	1.0805e-20	4.87448e-21	9.29538e-20	2.91291e-21
723	5.02039e-22	2.34612e-22	1.05943e-20	4.90025e-21	1.05646e-19	3.09892e-21
724	6.88797e-22	1.83665e-22	1.04257e-20	4.91046e-21	1.14388e-19	3.33601e-21
725	6.70171e-22	1.9868e-22	1.0303e-20	4.93184e-21	1.1805e-19	3.54215e-21
726	6.63532e-22	2.64185e-22	1.02726e-20	5.00263e-21	1.20282e-19	3.52696e-21
727	7.07027e-22	2.68408e-22	1.02308e-20	5.02908e-21	1.29104e-19	3.5863e-21
728	7.83853e-22	2.68791e-22	1.01444e-20	5.02863e-21	1.41514e-19	3.83027e-21
729	8.3923e-22	2.96618e-22	1.01973e-20	5.06297e-21	1.36231e-19	3.68496e-21
730	8.14397e-22	3.56239e-22	1.02791e-20	5.09121e-21	1.2772e-19	3.64007e-21
731	8.28001e-22	3.79724e-22	1.03732e-20	5.14241e-21	1.28808e-19	3.66346e-21
732	9.59872e-22	3.57504e-22	1.03926e-20	5.13464e-21	1.2456e-19	3.60117e-21
733	1.07945e-21	3.42527e-22	1.05427e-20	5.15691e-21	1.21393e-19	3.50692e-21
734	1.18214e-21	3.35759e-22	1.08347e-20	5.22525e-21	1.1249e-19	3.35106e-21
735	1.12054e-21	3.82175e-22	1.10698e-20	5.23473e-21	9.83599e-20	3.08958e-21
736	1.16804e-21	3.5923e-22	1.14592e-20	5.20038e-21	8.17307e-20	2.88484e-21
737	1.17674e-21	3.82331e-22	1.19856e-20	5.28884e-21	6.49176e-20	2.66852e-21
738	1.21214e-21	4.11244e-22	1.23382e-20	5.32382e-21	5.054e-20	2.60422e-21
739	1.2023e-21	4.182e-22	1.25881e-20	5.31993e-21	3.92881e-20	2.57572e-21
740	1.24792e-21	4.49292e-22	1.30363e-20	5.34004e-21	3.11893e-20	2.64908e-21
741	1.26438e-21	5.02747e-22	1.36554e-20	5.4579e-21	2.57881e-20	2.78074e-21
742	1.31781e-21	4.68633e-22	1.38924e-20	5.41712e-21	2.17538e-20	2.58596e-21
743	1.36065e-21	4.80873e-22	1.40574e-20	5.398e-21	1.95971e-20	2.58847e-21
744	1.44655e-21	5.31272e-22	1.44432e-20	5.53194e-21	1.7566e-20	2.75056e-21
745	1.35088e-21	6.06857e-22	1.45305e-20	5.57769e-21	1.66078e-20	2.80204e-21
746	1.36378e-21	5.41797e-22	1.46453e-20	5.58013e-21	1.60917e-20	2.78403e-21
747	1.37115e-21	5.24158e-22	1.48468e-20	5.62971e-21	1.57651e-20	2.82345e-21
748	1.44858e-21	5.22304e-22	1.48992e-20	5.64527e-21	1.53335e-20	2.71164e-21
749	1.5512e-21	5.1979e-22	1.48488e-20	5.62244e-21	1.51518e-20	2.6756e-21
750	1.5032e-21	5.26942e-22	1.46922e-20	5.6426e-21	1.50022e-20	2.71431e-21
751	1.55748e-21	5.27197e-22	1.46722e-20	5.7003e-21	1.51111e-20	2.70381e-21
752	1.56628e-21	5.36957e-22	1.4724e-20	5.7403e-21	1.50796e-20	2.69218e-21
753	1.51634e-21	5.88524e-22	1.46073e-20	5.766e-21	1.50934e-20	2.80319e-21
754	1.47602e-21	5.74188e-22	1.42275e-20	5.80081e-21	1.52134e-20	2.86688e-21
755	1.40422e-21	6.45937e-22	1.38709e-20	5.82904e-21	1.5364e-20	2.85178e-21
756	1.48694e-21	6.22866e-22	1.33448e-20	5.85157e-21	1.55957e-20	2.80582e-21
757	1.5171e-21	6.01837e-22	1.28453e-20	5.91425e-21	1.59126e-20	2.83665e-21
758	1.5422e-21	6.1992e-22	1.25806e-20	5.92943e-21	1.61324e-20	2.80021e-21
759	1.46268e-21	6.38008e-22	1.24302e-20	5.9383e-21	1.63207e-20	2.69622e-21
760	1.34773e-21	6.53615e-22	1.22693e-20	5.99753e-21	1.70036e-20	2.76693e-21
761	1.40469e-21	6.44051e-22	1.19454e-20	6.00965e-21	1.75402e-20	2.82844e-21
762	1.39655e-21	6.58175e-22	1.19006e-20	6.02795e-21	1.83953e-20	2.8816e-21
763	1.31134e-21	6.81154e-22	1.18451e-20	6.07919e-21	1.91469e-20	2.79556e-21
764	1.33067e-21	6.96063e-22	1.17402e-20	6.08367e-21	1.99089e-20	2.83245e-21
765	1.39368e-21	6.59039e-22	1.16002e-20	6.10271e-21	2.08333e-20	2.85394e-21
766	1.2332e-21	6.89797e-22	1.14892e-20	6.17368e-21	2.18343e-20	2.86303e-21
767	1.09645e-21	7.45001e-22	1.14178e-20	6.22504e-21	2.28861e-20	2.87211e-21
768	1.13545e-21	7.41384e-22	1.12652e-20	6.25426e-21	2.37673e-20	2.90574e-21
769	1.11487e-21	7.46587e-22	1.12739e-20	6.28095e-21	2.45551e-20	2.83498e-21
770	1.10317e-21	7.49543e-22	1.13211e-20	6.29496e-21	2.55571e-20	2.88131e-21
771	9.56232e-22	7.83759e-22	1.14483e-20	6.294e-21	2.74499e-20	2.83187e-21
772	9.33639e-22	7.78119e-22	1.15964e-20	6.33969e-21	2.87215e-20	2.82603e-21
773	9.17352e-22	7.70674e-22	1.17783e-20	6.40459e-21	2.99918e-20	2.89184e-21
774	9.7921e-22	7.6912e-22	1.21083e-20	6.44213e-21	3.0597e-20	2.8642e-21
775	9.12067e-22	7.98251e-22	1.23554e-20	6.46481e-21	3.08196e-20	2.87071e-21
776	7.38347e-22	8.39516e-22	1.27663e-20	6.48869e-21	3.08885e-20	2.89267e-21
777	6.90565e-22	8.54535e-22	1.31258e-20	6.52485e-21	3.09218e-20	2.95894e-21
778	6.97932e-22	8.51157e-22	1.33828e-20	6.54242e-21	3.11214e-20	2.95792e-21
779	6.15861e-22	8.65346e-22	1.38414e-20	6.57082e-21	3.14078e-20	2.96575e-21
780	6.13481e-22	8.7446e-22	1.42854e-20	6.61154e-21	3.13121e-20	2.95115e-21
781	6.85507e-22	8.68447e-22	1.46557e-20	6.58903e-21	3.11976e-20	2.98197e-21
782	7.49133e-22	8.55161e-22	1.49815e-20	6.65439e-21	3.09314e-20	2.88094e-21
783	7.41508e-22	8.62543e-22	1.54349e-20	6.6699e-21	3.06101e-20	2.95146e-21
784	6.47018e-22	9.19621e-22	1.60238e-20	6.67178e-21	3.01552e-20	2.91707e-21
785	6.49433e-22	9.22865e-22	1.63544e-20	6.68419e-21	3.0108e-20	2.91168e-21
786	6.71052e-22	9.13216e-22	1.67282e-20	6.69771e-21	3.00085e-20	2.90632e-21
787	7.21844e-22	8.82865e-22	1.70025e-20	6.70107e-21	3.03108e-20	3.03453e-21
788	6.16742e-22	9.30336e-22	1.73518e-20	6.71005e-21	3.07234e-20	2.98467e-21
789	5.68966e-22	9.38975e-22	1.76909e-20	6.74457e-21	3.14226e-20	2.95745e-21
790	5.80126e-22	9.45406e-22	1.80396e-20	6.78979e-21	3.22415e-20	2.91053e-21
791	5.44081e-22	9.56474e-22	1.80566e-20	6.78632e-21	3.2901e-20	2.94589e-21
792	6.08931e-22	9.16468e-22	1.79612e-20	6.77715e-21	3.34679e-20	3.01236e-21
793	4.45373e-22	9.65875e-22	1.78294e-20	6.85759e-21	3.4083e-20	3.00061e-21
794	3.24527e-22	1.01409e-21	1.77042e-20	6.89774e-21	3.47731e-20	2.91806e-21
795	2.9323e-22	1.00115e-21	1.74306e-20	6.88197e-21	3.53331e-20	2.87779e-21
796	3.41228e-22	1.00343e-21	1.72138e-20	6.84939e-21	3.5889e-20	2.98968e-21
797	1.38854e-22	1.01607e-21	1.70034e-20	6.85802e-21	3.57342e-20	2.94051e-21
798	6.9774e-23	9.90589e-22	1.67642e-20	6.90341e-21	3.57602e-20	3.00653e-21
799	1.04116e-22	1.02881e-21	1.6621e-20	6.97181e-21	3.49461e-20	2.91269e-21
800	2.16246e-22	1.00653e-21	1.64314e-20	6.87754e-21	3.45093e-20	2.8832e-21
801	4.67167e-22	1.01248e-21	1.62884e-20	6.8292e-21	3.42435e-20	2.89368e-21
802	7.20485e-22	1.00319e-21	1.62752e-20	6.90251e-21	3.35665e-20	2.91389e-21
803	1.05542e-21	1.04341e-21	1.62906e-20	6.86798e-21	3.28121e-20	2.96741e-21
804	1.4066e-21	1.04582e-21	1.62755e-20	6.90176e-21	3.16581e-20	2.92e-21
805	1.87533e-21	1.04185e-21	1.64378e-20	6.92479e-21	3.07717e-20	3.05607e-21
806	2.27217e-21	9.99257e-22	1.68476e-20	6.90911e-21	2.98448e-20	3.09869e-21
807	2.92141e-21	1.01298e-21	1.73813e-20	6.87365e-21	2.92252e-20	3.02361e-21
808	3.68137e-21	1.01911e-21	1.78507e-20	6.8876e-21	2.84313e-20	2.94637e-21
809	4.67254e-21	1.06391e-21	1.85252e-20	6.92244e-21	2.78843e-20	3.00006e-21
810	5.63197e-21	1.03879e-21	1.94543e-20	6.973e-21	2.71572e-20	2.99042e-21
811	7.52857e-21	1.07812e-21	2.09227e-20	6.96008e-21	2.6071e-20	2.94812e-21
812	9.00574e-21	1.09064e-21	2.2159e-20	6.97895e-21	2.55155e-20	2.91195e-21
813	1.06432e-20	1.09685e-21	2.36611e-20	7.00083e-21	2.53311e-20	3.01399e-21
814	1.24634e-20	1.10463e-21	2.54328e-20	7.00636e-21	2.51835e-20	3.10287e-21
815	1.44537e-20	1.10109e-21	2.74807e-20	6.97741e-21	2.43049e-20	3.07529e-21
816	1.67413e-20	1.10859e-21	3.00021e-20	6.97088e-21	2.33997e-20	2.99384e-21
817	1.91931e-20	1.10717e-21	3.3006e-20	7.00914e-21	2.31797e-20	3.01605e-21
818	2.18929e-20	1.12155e-21	3.64345e-20	7.03549e-21	2.28922e-20	2.97681e-21
819	2.46767e-20	1.11521e-21	4.04824e-20	7.04035e-21	2.20975e-20	3.02022e-21
820	2.76223e-20	1.11196e-21	4.52565e-20	7.04465e-21	2.14333e-20	3.03677e-21
821	3.07305e-20	1.14819e-21	5.09877e-20	7.03397e-21	2.05203e-20	3.00891e-21
822	3.37663e-20	1.18332e-21	5.77691e-20	7.06189e-21	1.95804e-20	3.03611e-21
823	3.66726e-20	1.18549e-21	6.56884e-20	7.10086e-21	1.88425e-20	2.99217e-21
824	3.9424e-20	1.1871e-21	7.46743e-20	7.10889e-21	1.8534e-20	3.04391e-21
825	4.32483e-20	1.2115e-21	9.0132e-20	7.18071e-21	1.80686e-20	3.02004e-21
826	4.55486e-20	1.22557e-21	1.01694e-19	7.2193e-21	1.77649e-20	2.99931e-21
827	4.7883e-20	1.25139e-21	1.14186e-19	7.24775e-21	1.76911e-20	2.99783e-21
828	5.04626e-20	1.27029e-21	1.27516e-19	7.33682e-21	1.75975e-20	3.0426e-21
829	5.33012e-20	1.27896e-21	1.41197e-19	7.43812e-21	1.74919e-20	3.07039e-21
830	5.80199e-20	1.30733e-21	1.55205e-19	7.51656e-21	1.74015e-20	3.02309e-21
831	5.89013e-20	1.3013e-21	1.69409e-19	7.58113e-21	1.75126e-20	3.06826e-21
832	5.58992e-20	1.28456e-21	1.83369e-19	7.61889e-21	1.7443e-20	3.02112e-21
833	5.55027e-20	1.28757e-21	1.97026e-19	7.72644e-21	1.74194e-20	3.05422e-21
834	5.55267e-20	1.31104e-21	2.0999e-19	7.75398e-21	1.74235e-20	3.03977e-21
835	5.56283e-20	1.32117e-21	2.21795e-19	7.79913e-21	1.73418e-20	2.98859e-21
836	5.54851e-20	1.35124e-21	2.3165e-19	7.85658e-21	1.72841e-20	2.9793e-21
837	5.46446e-20	1.31816e-21	2.39028e-19	7.88517e-21	1.72026e-20	2.9524e-21
838	5.26706e-20	1.27931e-21	2.44493e-19	7.91226e-21	1.74418e-20	2.99157e-21
839	5.10046e-20	1.29435e-21	2.44332e-19	7.93761e-21	1.73683e-20	3.04074e-21
840	4.89764e-20	1.29632e-21	2.40449e-19	7.92659e-21	1.73406e-20	3.01524e-21
841	4.68722e-20	1.24416e-21	2.34129e-19	7.88035e-21	1.73461e-20	2.97342e-21
842	4.48864e-20	1.23116e-21	2.23109e-19	7.83316e-21	1.73877e-20	2.99509e-21
843	4.29893e-20	1.22839e-21	2.09365e-19	7.77885e-21	1.72484e-20	2.93623e-21
844	4.13674e-20	1.22138e-21	1.94989e-19	7.67951e-21	1.72061e-20	2.95464e-21
845	3.98133e-20	1.21899e-21	1.77864e-19	7.5875e-21	1.72087e-20	2.9697e-21
846	3.83074e-20	1.21832e-21	1.60684e-19	7.53491e-21	1.72435e-20	2.93558e-21
847	3.68098e-20	1.2366e-21	1.44487e-19	7.43797e-21	1.7197e-20	2.94841e-21
848	3.53744e-20	1.23176e-21	1.28839e-19	7.36514e-21	1.73148e-20	2.97577e-21
849	3.38556e-20	1.2195e-21	1.13305e-19	7.2524e-21	1.74248e-20	3.06909e-21
850	3.23107e-20	1.2124e-21	9.80575e-20	7.19707e-21	1.73457e-20	3.08655e-21
851	3.0799e-20	1.1788e-21	8.3496e-20	7.15002e-21	1.72599e-20	2.95982e-21
852	2.92021e-20	1.18893e-21	6.40268e-20	7.04552e-21	1.71767e-20	3.00538e-21
853	2.84803e-20	1.19904e-21	5.32899e-20	7.00427e-21	1.71281e-20	3.00293e-21
854	2.71786e-20	1.15045e-21	4.43305e-20	6.95291e-21	1.70181e-20	2.95353e-21
855	2.5702e-20	1.14574e-21	3.72913e-20	6.91565e-21	1.69898e-20	2.97242e-21
856	2.44736e-20	1.14699e-21	3.19386e-20	6.85181e-21	1.70241e-20	2.98558e-21
857	2.36431e-20	1.1546e-21	2.79997e-20	6.80936e-21	1.69875e-20	2.97754e-21
858	2.23708e-20	1.16133e-21	2.52589e-20	6.7938e-21	1.68811e-20	2.94342e-21
859	2.15683e-20	1.14089e-21	2.33398e-20	6.78979e-21	1.67306e-20	2.94059e-21
860	2.09545e-20	1.11156e-21	2.20048e-20	6.76415e-21	1.66958e-20	2.90642e-21
861	2.00905e-20	1.08555e-21	2.09877e-20	6.71995e-21	1.67826e-20	2.97275e-21
862	1.86997e-20	1.08323e-21	2.02808e-20	6.71423e-21	1.66351e-20	2.89459e-21
863	1.69499e-20	1.05461e-21	1.97136e-20	6.72552e-21	1.64827e-20	2.81919e-21
864	1.49499e-20	1.03737e-21	1.90531e-20	6.66973e-21	1.6564e-20	2.86702e-21
865	1.19593e-20	1.01779e-21	1.83988e-20	6.66352e-21	1.63618e-20	2.81787e-21
866	1.01944e-20	1.01258e-21	1.79548e-20	6.62557e-21	1.6455e-20	2.86792e-21
867	8.71541e-21	1.03086e-21	1.76155e-20	6.58946e-21	1.64414e-20	2.84536e-21
868	7.37431e-21	9.97305e-22	1.73881e-20	6.58711e-21	1.65448e-20	2.86958e-21
869	6.37294e-21	9.85422e-22	1.71039e-20	6.58797e-21	1.65276e-20	2.81491e-21
870	5.67583e-21	1.00453e-21	1.68321e-20	6.5431e-21	1.64233e-20	2.81533e-21
871	5.14496e-21	1.00509e-21	1.66335e-20	6.52989e-21	1.64802e-20	2.84734e-21
872	4.60757e-21	9.79728e-22	1.64702e-20	6.52178e-21	1.66376e-20	2.82608e-21
873	4.19489e-21	9.7248e-22	1.62924e-20	6.48431e-21	1.65927e-20	2.80564e-21
874	3.8849e-21	9.74343e-22	1.61437e-20	6.4466e-21	1.65793e-20	2.8078e-21
875	3.60557e-21	9.62265e-22	1.60693e-20	6.42852e-21	1.66862e-20	2.79357e-21
876	3.40268e-21	9.37848e-22	1.59411e-20	6.38193e-21	1.67222e-20	2.78487e-21
877	3.25001e-21	9.21976e-22	1.59579e-20	6.36742e-21	1.68739e-20	2.78649e-21
878	3.18209e-21	9.28942e-22	1.59859e-20	6.34928e-21	1.70313e-20	2.78847e-21
879	2.93006e-21	8.83254e-22	1.60302e-20	6.32719e-21	1.68994e-20	2.75677e-21
880	2.93195e-21	8.94146e-22	1.60635e-20	6.33413e-21	1.68712e-20	2.70941e-21
881	2.91298e-21	9.11287e-22	1.61256e-20	6.29424e-21	1.6883e-20	2.73281e-21
882	2.8172e-21	8.87439e-22	1.61559e-20	6.24055e-21	1.70148e-20	2.71761e-21
883	2.77244e-21	8.83528e-22	1.62197e-20	6.22901e-21	1.70705e-20	2.76482e-21
884	2.70616e-21	8.66203e-22	1.61684e-20	6.19573e-21	1.70023e-20	2.70753e-21
885	2.64063e-21	8.54261e-22	1.61471e-20	6.16641e-21	1.70551e-20	2.67132e-21
886	2.63132e-21	8.45229e-22	1.60849e-20	6.14535e-21	1.70565e-20	2.66188e-21
887	2.66912e-21	8.68138e-22	1.60423e-20	6.12302e-21	1.71367e-20	2.66712e-21
888	2.60784e-21	8.69622e-22	1.59527e-20	6.08365e-21	1.70546e-20	2.62316e-21
889	2.54024e-21	8.44049e-22	1.58464e-20	6.0601e-21	1.71643e-20	2.64413e-21
890	2.51773e-21	8.24465e-22	1.57139e-20	6.05735e-21	1.71899e-20	2.68821e-21
891	2.39966e-21	7.81291e-22	1.55236e-20	6.02399e-21	1.71658e-20	2.65336e-21
892	2.41781e-21	7.80871e-22	1.52218e-20	5.94271e-21	1.72259e-20	2.62608e-21
893	2.39708e-21	7.81935e-22	1.50842e-20	5.90573e-21	1.72168e-20	2.56673e-21
894	2.39556e-21	7.88096e-22	1.49888e-20	5.89847e-21	1.72175e-20	2.53539e-21
895	2.34577e-21	7.65602e-22	1.48282e-20	5.86128e-21	1.72369e-20	2.55987e-21
896	2.29827e-21	7.43749e-22	1.46597e-20	5.80213e-21	1.73749e-20	2.597e-21
897	2.29766e-21	7.32054e-22	1.45738e-20	5.76984e-21	1.75137e-20	2.55989e-21
898	2.38353e-21	7.21163e-22	1.46069e-20	5.75247e-21	1.75832e-20	2.53131e-21
899	2.4631e-21	7.10418e-22	1.45243e-20	5.68118e-21	1.7629e-20	2.50866e-21
900	2.53558e-21	7.06416e-22	1.4548e-20	5.68951e-21	1.7899e-20	2.50869e-21
901	2.60058e-21	7.16851e-22	1.46598e-20	5.66599e-21	1.81639e-20	2.51273e-21
902	2.7116e-21	7.02253e-22	1.47647e-20	5.61186e-21	1.8333e-20	2.4539e-21
903	2.84882e-21	6.92983e-22	1.50438e-20	5.5883e-21	1.87515e-20	2.50438e-21
904	3.00924e-21	6.72144e-22	1.52131e-20	5.54328e-21	1.90997e-20	2.50995e-21
905	3.21964e-21	6.80742e-22	1.55676e-20	5.51056e-21	1.95576e-20	2.46153e-21
906	3.58766e-21	6.81028e-22	1.6241e-20	5.47186e-21	2.04344e-20	2.43068e-21
907	3.89926e-21	6.79395e-22	1.67609e-20	5.42892e-21	2.11182e-20	2.40907e-21
908	4.19417e-21	6.59901e-22	1.73075e-20	5.39655e-21	2.20502e-20	2.40034e-21
909	4.52462e-21	6.56535e-22	1.79639e-20	5.38211e-21	2.30969e-20	2.35203e-21
910	4.81984e-21	6.30507e-22	1.86375e-20	5.32279e-21	2.42087e-20	2.31871e-21
911	5.20184e-21	6.21201e-22	1.93867e-20	5.29712e-21	2.53587e-20	2.31409e-21
912	5.68786e-21	6.26553e-22	2.02469e-20	5.2831e-21	2.65474e-20	2.28738e-21
913	6.13296e-21	6.16588e-22	2.10641e-20	5.22003e-21	2.78548e-20	2.2955e-21
914	6.60523e-21	6.02936e-22	2.19229e-20	5.18425e-21	2.89767e-20	2.25733e-21
915	7.07688e-21	5.85658e-22	2.27828e-20	5.12615e-21	3.00648e-20	2.25854e-21
916	7.55823e-21	5.69122e-22	2.36814e-20	5.10407e-21	3.09502e-20	2.26089e-21
917	8.13811e-21	5.73661e-22	2.47054e-20	5.08057e-21	3.15535e-20	2.25372e-21
918	8.70234e-21	5.57419e-22	2.5756e-20	5.05222e-21	3.2294e-20	2.2107e-21
919	9.63611e-21	5.64646e-22	2.74747e-20	4.99478e-21	3.38095e-20	2.18574e-21
920	1.01553e-20	5.17687e-22	2.86959e-20	4.94941e-21	3.41758e-20	2.17496e-21
921	1.07596e-20	5.44612e-22	2.97086e-20	4.91184e-21	3.41738e-20	2.20153e-21
922	1.13346e-20	5.34331e-22	3.06781e-20	4.86312e-21	3.42337e-20	2.19757e-21
923	1.18276e-20	5.23312e-22	3.17897e-20	4.83917e-21	3.42987e-20	2.21372e-21
924	1.22738e-20	5.12024e-22	3.29746e-20	4.806e-21	3.41759e-20	2.19241e-21
925	1.27064e-20	4.85072e-22	3.4315e-20	4.77326e-21	3.36927e-20	2.12069e-21
926	1.30706e-20	4.75619e-22	3.58377e-20	4.70834e-21	3.31713e-20	2.09293e-21
927	1.34818e-20	4.79752e-22	3.76937e-20	4.68863e-21	3.28359e-20	2.15041e-21
928	1.38327e-20	4.78864e-22	4.00041e-20	4.68082e-21	3.28868e-20	2.15026e-21
929	1.40788e-20	4.55712e-22	4.28544e-20	4.6575e-21	3.33672e-20	2.07665e-21
930	1.43283e-20	4.45319e-22	4.64344e-20	4.63708e-21	3.43338e-20	2.06843e-21
931	1.45865e-20	4.39899e-22	5.08316e-20	4.6088e-21	3.58669e-20	2.08764e-21
932	1.48287e-20	4.37794e-22	5.61433e-20	4.59281e-21	3.81072e-20	2.07617e-21
933	1.49993e-20	4.2648e-22	6.55875e-20	4.55936e-21	4.3046e-20	2.0686e-21
934	1.49637e-20	3.98864e-22	7.31229e-20	4.5673e-21	4.7551e-20	2.14936e-21
935	1.47928e-20	3.757e-22	8.18664e-20	4.57108e-21	5.28733e-20	2.16192e-21
936	1.43856e-20	3.79965e-22	9.17125e-20	4.56778e-21	5.92908e-20	2.24604e-21
937	1.40877e-20	3.70306e-22	1.02313e-19	4.5561e-21	6.68697e-20	2.32592e-21
938	1.38318e-20	3.4085e-22	1.13222e-19	4.58506e-21	7.57014e-20	2.41254e-21
939	1.36321e-20	3.27323e-22	1.24013e-19	4.59657e-21	8.56891e-20	2.61626e-21
940	1.34965e-20	3.48546e-22	1.34308e-19	4.58991e-21	9.63801e-20	2.85088e-21
941	1.34062e-20	3.38132e-22	1.4403e-19	4.60364e-21	1.07764e-19	3.07439e-21
942	1.32654e-20	2.96687e-22	1.53134e-19	4.60462e-21	1.19579e-19	3.35164e-21
943	1.32957e-20	2.97664e-22	1.61821e-19	4.60139e-21	1.31699e-19	3.67005e-21
944	1.34444e-20	2.85789e-22	1.70165e-19	4.59952e-21	1.44035e-19	3.96264e-21
945	1.36978e-20	2.68725e-22	1.77239e-19	4.59198e-21	1.56693e-19	4.24084e-21
946	1.44686e-20	2.62724e-22	1.80558e-19	4.59017e-21	1.76327e-19	4.72525e-21
947	1.53961e-20	2.57816e-22	1.80495e-19	4.54378e-21	1.89746e-19	5.09922e-21
948	1.66402e-20	2.60139e-22	1.7967e-19	4.49552e-21	2.0264e-19	5.46381e-21
949	1.83058e-20	2.6337e-22	1.77573e-19	4.43108e-21	2.11753e-19	5.62987e-21
950	2.045e-20	2.56496e-22	1.7414e-19	4.41099e-21	2.16751e-19	5.77612e-21
951	2.32012e-20	2.6038e-22	1.69208e-19	4.35246e-21	2.21645e-19	5.88621e-21
952	2.65895e-20	2.67076e-22	1.62578e-19	4.26127e-21	2.26589e-19	6.04459e-21
953	3.0826e-20	2.80277e-22	1.55121e-19	4.19009e-21	2.31243e-19	6.18471e-21
954	3.59813e-20	2.95331e-22	1.47004e-19	4.11229e-21	2.35151e-19	6.25847e-21
955	4.20922e-20	3.29484e-22	1.38663e-19	4.01679e-21	2.37863e-19	6.29025e-21
956	4.93426e-20	3.6459e-22	1.30633e-19	3.9467e-21	2.39334e-19	6.36186e-21
957	5.77737e-20	4.01759e-22	1.2312e-19	3.88201e-21	2.39258e-19	6.39792e-21
958	6.75326e-20	4.51322e-22	1.16546e-19	3.82456e-21	2.36438e-19	6.31485e-21
959	7.86583e-20	5.11938e-22	1.11069e-19	3.76652e-21	2.31421e-19	6.15772e-21
960	9.79074e-20	6.24127e-22	1.05425e-19	3.70014e-21	2.24211e-19	5.95246e-21
961	1.12403e-19	7.16147e-22	1.03441e-19	3.66076e-21	2.20769e-19	5.89219e-21
962	1.28165e-19	7.79028e-22	1.02351e-19	3.62387e-21	2.17241e-19	5.80899e-21
963	1.45151e-19	8.79044e-22	1.01555e-19	3.5966e-21	2.133e-19	5.64933e-21
964	1.63212e-19	9.86004e-22	1.01745e-19	3.5707e-21	2.08272e-19	5.50831e-21
965	1.82215e-19	1.10265e-21	1.03447e-19	3.55738e-21	2.02313e-19	5.35203e-21
966	2.01916e-19	1.21947e-21	1.06149e-19	3.52037e-21	1.95539e-19	5.19633e-21
967	2.22293e-19	1.34851e-21	1.09692e-19	3.49965e-21	1.88618e-19	5.02368e-21
968	2.43137e-19	1.46566e-21	1.13925e-19	3.49442e-21	1.81535e-19	4.79465e-21
969	2.64428e-19	1.56668e-21	1.18813e-19	3.49705e-21	1.73728e-19	4.59122e-21
970	2.85933e-19	1.68117e-21	1.24554e-19	3.50645e-21	1.65021e-19	4.355e-21
971	3.07634e-19	1.81157e-21	1.30962e-19	3.52183e-21	1.55637e-19	4.15093e-21
972	3.29382e-19	1.94988e-21	1.37985e-19	3.53636e-21	1.46176e-19	3.92361e-21
973	3.60775e-19	2.12635e-21	1.49758e-19	3.57027e-21	1.33048e-19	3.53974e-21
974	3.80083e-19	2.22776e-21	1.58302e-19	3.58221e-21	1.26045e-19	3.37168e-21
975	3.96775e-19	2.31807e-21	1.67158e-19	3.60767e-21	1.20227e-19	3.25331e-21
976	4.09706e-19	2.38427e-21	1.75806e-19	3.64712e-21	1.15451e-19	3.19198e-21
977	4.17726e-19	2.41115e-21	1.83173e-19	3.71354e-21	1.12175e-19	3.08775e-21
978	4.23365e-19	2.44132e-21	1.88714e-19	3.71289e-21	1.09988e-19	3.05621e-21
979	4.25313e-19	2.4324e-21	1.93397e-19	3.68135e-21	1.08812e-19	2.98826e-21
980	4.24721e-19	2.41655e-21	1.97799e-19	3.69487e-21	1.08711e-19	2.949e-21
981	4.19524e-19	2.3835e-21	2.02346e-19	3.70636e-21	1.09352e-19	3.00312e-21
982	4.11985e-19	2.35595e-21	2.06713e-19	3.71453e-21	1.10917e-19	3.069e-21
983	4.00629e-19	2.27523e-21	2.10352e-19	3.7148e-21	1.12843e-19	3.07819e-21
984	3.87727e-19	2.19242e-21	2.11744e-19	3.71376e-21	1.15335e-19	3.18462e-21
985	3.74048e-19	2.12226e-21	2.09112e-19	3.6774e-21	1.17949e-19	3.21698e-21
986	3.58903e-19	2.03068e-21	2.02332e-19	3.62409e-21	1.20639e-19	3.28255e-21
987	3.34185e-19	1.88151e-21	1.89753e-19	3.51835e-21	1.2422e-19	3.3413e-21
988	3.16563e-19	1.78125e-21	1.79005e-19	3.47269e-21	1.26366e-19	3.39058e-21
989	2.9729e-19	1.64265e-21	1.64942e-19	3.40796e-21	1.27812e-19	3.4507e-21
990	2.77435e-19	1.53283e-21	1.52215e-19	3.31698e-21	1.28409e-19	3.43052e-21
991	2.5646e-19	1.39277e-21	1.41901e-19	3.25886e-21	1.28361e-19	3.42927e-21
992	2.35493e-19	1.26173e-21	1.30976e-19	3.19149e-21	1.2776e-19	3.42845e-21
993	2.14273e-19	1.13899e-21	1.19579e-19	3.09915e-21	1.25602e-19	3.33186e-21
994	1.93832e-19	1.00383e-21	1.08241e-19	3.04187e-21	1.2132e-19	3.22806e-21
995	1.74457e-19	8.90269e-22	9.71821e-20	2.97996e-21	1.1631e-19	3.11893e-21
996	1.56316e-19	7.8562e-22	8.67175e-20	2.90181e-21	1.11566e-19	2.98283e-21
997	1.39997e-19	6.9432e-22	7.69528e-20	2.84249e-21	1.07395e-19	2.88677e-21
998	1.24844e-19	6.03912e-22	6.80341e-20	2.79181e-21	1.03449e-19	2.85047e-21
999	1.11264e-19	5.45748e-22	6.00463e-20	2.75104e-21	9.89088e-20	2.70954e-21
1000	9.33779e-20	4.46868e-22	4.98098e-20	2.68611e-21	9.12996e-20	2.5173e-21
1001	8.28117e-20	3.82997e-22	4.41692e-20	2.66366e-21	8.58973e-20	2.399e-21
1002	7.40513e-20	3.42608e-22	3.93887e-20	2.63736e-21	8.08323e-20	2.29425e-21
1003	6.56026e-20	3.08671e-22	3.53795e-20	2.59879e-21	7.62748e-20	2.19239e-21
1004	5.88406e-20	2.65073e-22	3.2109e-20	2.57652e-21	7.2062e-20	2.13619e-21
1005	5.20735e-20	2.51971e-22	2.9419e-20	2.55441e-21	6.83563e-20	2.10078e-21
1006	4.70879e-20	2.42006e-22	2.72347e-20	2.52453e-21	6.49889e-20	1.95186e-21
1007	4.19268e-20	2.24399e-22	2.53972e-20	2.48939e-21	6.21751e-20	1.96101e-21
1008	3.84783e-20	2.03576e-22	2.39966e-20	2.49652e-21	5.98703e-20	1.9433e-21
1009	3.44526e-20	1.97071e-22	2.27598e-20	2.49158e-21	5.78808e-20	1.88732e-21
1010	3.21727e-20	2.19939e-22	2.15875e-20	2.46785e-21	5.60172e-20	1.80571e-21
1011	2.90258e-20	2.17375e-22	2.06214e-20	2.46017e-21	5.43813e-20	1.79067e-21
1012	2.76864e-20	2.35841e-22	1.97712e-20	2.4367e-21	5.30613e-20	1.76229e-21
1013	2.52282e-20	2.34019e-22	1.9038e-20	2.40179e-21	5.17674e-20	1.74585e-21
1014	2.34763e-20	2.44538e-22	1.81576e-20	2.37892e-21	5.10712e-20	1.7524e-21
1015	2.24532e-20	2.4418e-22	1.77262e-20	2.36961e-21	5.10005e-20	1.80045e-21
1016	2.13327e-20	2.56662e-22	1.7279e-20	2.35123e-21	5.13983e-20	1.78387e-21
1017	2.09247e-20	2.56947e-22	1.69755e-20	2.36143e-21	5.25259e-20	1.75118e-21
1018	1.98316e-20	2.59144e-22	1.67121e-20	2.35874e-21	5.43071e-20	1.79541e-21
1019	1.96252e-20	2.75707e-22	1.64492e-20	2.32883e-21	5.67747e-20	1.84567e-21
1020	1.86143e-20	2.74176e-22	1.63071e-20	2.33641e-21	6.01374e-20	1.90393e-21
1021	1.87086e-20	2.70037e-22	1.61568e-20	2.32707e-21	6.4762e-20	1.97385e-21
1022	1.79379e-20	2.76599e-22	1.60237e-20	2.30634e-21	7.06475e-20	2.09852e-21
1023	1.77192e-20	2.84128e-22	1.59863e-20	2.29352e-21	7.82228e-20	2.23168e-21
1024	1.72748e-20	2.85197e-22	1.59453e-20	2.29291e-21	8.75477e-20	2.49107e-21
1025	1.70786e-20	3.07418e-22	1.5882e-20	2.2661e-21	9.86591e-20	2.79027e-21
1026	1.688e-20	3.00207e-22	1.59192e-20	2.27737e-21	1.11842e-19	3.0988e-21
1027	1.6762e-20	3.22296e-22	1.5985e-20	2.26724e-21	1.35297e-19	3.62037e-21
1028	1.65824e-20	3.28376e-22	1.60587e-20	2.25044e-21	1.52218e-19	4.0843e-21
1029	1.67112e-20	3.01838e-22	1.62414e-20	2.25207e-21	1.69512e-19	4.55748e-21
1030	1.70183e-20	3.21041e-22	1.63201e-20	2.23503e-21	1.86266e-19	4.95074e-21
1031	1.82859e-20	3.22389e-22	1.64986e-20	2.22103e-21	2.02066e-19	5.38574e-21
1032	2.09966e-20	3.51649e-22	1.66862e-20	2.22096e-21	2.16758e-19	5.82877e-21
1033	2.72842e-20	4.0539e-22	1.69827e-20	2.23099e-21	2.31211e-19	6.24984e-21
1034	2.80905e-20	4.01088e-22	1.72239e-20	2.21497e-21	2.4389e-19	6.56813e-21
1035	1.82525e-20	3.44359e-22	1.7402e-20	2.19592e-21	2.53304e-19	6.87594e-21
1036	1.52262e-20	3.49385e-22	1.76555e-20	2.16912e-21	2.61053e-19	7.05036e-21
1037	1.49743e-20	3.69549e-22	1.79703e-20	2.17509e-21	2.66503e-19	7.19088e-21
1038	1.46513e-20	3.84389e-22	1.83092e-20	2.18389e-21	2.69746e-19	7.29779e-21
1039	1.46984e-20	3.74521e-22	1.87332e-20	2.1844e-21	2.70259e-19	7.29378e-21
1040	1.46519e-20	3.6295e-22	1.90735e-20	2.17889e-21	2.67921e-19	7.26176e-21
1041	1.50005e-20	3.75989e-22	1.98341e-20	2.16256e-21	2.57609e-19	7.04868e-21
1042	1.5344e-20	3.67695e-22	2.03567e-20	2.17672e-21	2.46948e-19	6.77032e-21
1043	1.55958e-20	3.78401e-22	2.08926e-20	2.17722e-21	2.34146e-19	6.47035e-21
1044	1.58346e-20	4.08778e-22	2.14512e-20	2.18524e-21	2.20447e-19	6.03834e-21
1045	1.63498e-20	4.03527e-22	2.20399e-20	2.18263e-21	2.07003e-19	5.67684e-21
1046	1.6748e-20	3.91542e-22	2.27356e-20	2.1905e-21	1.94369e-19	5.29e-21
1047	1.71858e-20	4.16795e-22	2.33991e-20	2.17887e-21	1.8312e-19	4.94959e-21
1048	1.76925e-20	4.29562e-22	2.41462e-20	2.1748e-21	1.73185e-19	4.68184e-21
1049	1.81021e-20	4.17263e-22	2.49534e-20	2.15853e-21	1.64543e-19	4.45433e-21
1050	1.85716e-20	4.56785e-22	2.57918e-20	2.14784e-21	1.5725e-19	4.26811e-21
1051	1.91907e-20	4.46842e-22	2.67116e-20	2.1747e-21	1.51409e-19	4.10264e-21
1052	1.96229e-20	4.39178e-22	2.76271e-20	2.17189e-21	1.46769e-19	3.99182e-21
1053	2.01284e-20	4.3103e-22	2.86557e-20	2.17043e-21	1.43157e-19	3.84486e-21
1054	2.084e-20	4.20529e-22	3.04125e-20	2.18873e-21	1.39189e-19	3.75107e-21
1055	2.13323e-20	4.19861e-22	3.16939e-20	2.17497e-21	1.36722e-19	3.68372e-21
1056	2.17464e-20	4.33439e-22	3.312e-20	2.18182e-21	1.33896e-19	3.61982e-21
1057	2.21175e-20	4.252e-22	3.46504e-20	2.19674e-21	1.30809e-19	3.55714e-21
1058	2.24871e-20	4.45717e-22	3.63025e-20	2.19754e-21	1.27579e-19	3.48646e-21
1059	2.28964e-20	4.17667e-22	3.81252e-20	2.21082e-21	1.24262e-19	3.41247e-21
1060	2.31815e-20	4.27182e-22	4.00824e-20	2.22965e-21	1.20551e-19	3.38929e-21
1061	2.3411e-20	4.379e-22	4.20761e-20	2.2289e-21	1.1604e-19	3.22749e-21
1062	2.36311e-20	4.27555e-22	4.41447e-20	2.23629e-21	1.11099e-19	3.05513e-21
1063	2.38715e-20	4.27094e-22	4.62971e-20	2.21435e-21	1.0697e-19	2.95576e-21
1064	2.40983e-20	4.3599e-22	4.85165e-20	2.22024e-21	1.03549e-19	2.87269e-21
1065	2.40785e-20	4.52238e-22	5.08127e-20	2.23002e-21	9.98904e-20	2.79206e-21
1066	2.4102e-20	4.49638e-22	5.32304e-20	2.27986e-21	9.53952e-20	2.68427e-21
1067	2.41461e-20	4.29608e-22	5.56274e-20	2.27529e-21	9.0271e-20	2.49549e-21
1068	2.42823e-20	4.38978e-22	5.91604e-20	2.27978e-21	8.28418e-20	2.36844e-21
1069	2.43087e-20	4.30354e-22	6.13851e-20	2.30203e-21	7.90664e-20	2.27776e-21
1070	2.43377e-20	4.3065e-22	6.35509e-20	2.27862e-21	7.58586e-20	2.2206e-21
1071	2.44544e-20	4.02447e-22	6.57414e-20	2.28792e-21	7.39956e-20	2.22402e-21
1072	2.44422e-20	4.07468e-22	6.78824e-20	2.31847e-21	7.30766e-20	2.13489e-21
1073	2.44156e-20	4.27131e-22	7.00613e-20	2.31423e-21	7.31477e-20	2.14137e-21
1074	2.43224e-20	4.24132e-22	7.23184e-20	2.31186e-21	7.44064e-20	2.2041e-21
1075	2.41713e-20	4.18092e-22	7.46535e-20	2.32641e-21	7.65619e-20	2.25303e-21
1076	2.40616e-20	4.23543e-22	7.69647e-20	2.36367e-21	8.0414e-20	2.37824e-21
1077	2.39336e-20	4.45001e-22	7.96072e-20	2.3545e-21	8.55856e-20	2.50821e-21
1078	2.38726e-20	4.36967e-22	8.26483e-20	2.36978e-21	9.24091e-20	2.69181e-21
1079	2.38825e-20	4.33042e-22	8.60588e-20	2.41765e-21	1.0145e-19	2.84558e-21
1080	2.38859e-20	4.30683e-22	8.97881e-20	2.43174e-21	1.12609e-19	3.14202e-21
1081	2.39948e-20	4.21109e-22	9.6211e-20	2.45024e-21	1.3467e-19	3.70879e-21
1082	2.41352e-20	4.19434e-22	1.01142e-19	2.47968e-21	1.53303e-19	4.21363e-21
1083	2.43954e-20	4.02649e-22	1.066e-19	2.50812e-21	1.75541e-19	4.79817e-21
1084	2.47161e-20	4.14033e-22	1.12581e-19	2.52575e-21	2.01221e-19	5.53603e-21
1085	2.50645e-20	4.20835e-22	1.19143e-19	2.54558e-21	2.30012e-19	6.34603e-21
1086	2.54793e-20	4.1603e-22	1.26324e-19	2.59294e-21	2.60693e-19	7.19525e-21
1087	2.60059e-20	4.14463e-22	1.34084e-19	2.6476e-21	2.91779e-19	8.02823e-21
1088	2.65711e-20	4.08917e-22	1.42508e-19	2.68696e-21	3.21858e-19	8.85394e-21
1089	2.7348e-20	3.88488e-22	1.51874e-19	2.7498e-21	3.50595e-19	9.60747e-21
1090	2.81257e-20	3.95988e-22	1.62023e-19	2.8019e-21	3.79104e-19	1.03704e-20
1091	2.91564e-20	3.76785e-22	1.73311e-19	2.87295e-21	4.08662e-19	1.12415e-20
1092	3.04582e-20	3.59441e-22	1.85722e-19	2.93762e-21	4.42084e-19	1.21338e-20
1093	3.19747e-20	3.5189e-22	1.99577e-19	3.0275e-21	4.79409e-19	1.3051e-20
1094	3.37313e-20	3.60811e-22	2.14968e-19	3.09983e-21	5.15653e-19	1.40425e-20
1095	3.6867e-20	3.49211e-22	2.41725e-19	3.27799e-21	5.4875e-19	1.49059e-20
1096	3.9607e-20	3.39746e-22	2.62985e-19	3.42186e-21	5.60194e-19	1.51988e-20
1097	4.28682e-20	3.25696e-22	2.85601e-19	3.56945e-21	5.76777e-19	1.57495e-20
1098	4.67469e-20	3.128e-22	3.09438e-19	3.69885e-21	5.9839e-19	1.63371e-20
1099	5.12799e-20	3.0869e-22	3.34397e-19	3.83867e-21	6.14538e-19	1.67548e-20
1100	5.65931e-20	3.08761e-22	3.60718e-19	4.02827e-21	6.19655e-19	1.68606e-20
1101	6.28752e-20	3.3055e-22	3.88842e-19	4.18447e-21	6.13694e-19	1.66117e-20
1102	7.03464e-20	3.24311e-22	4.19475e-19	4.369e-21	5.99912e-19	1.62541e-20
1103	7.91214e-20	3.15751e-22	4.53985e-19	4.60296e-21	5.84122e-19	1.59061e-20
1104	8.92698e-20	3.40552e-22	4.95199e-19	4.85931e-21	5.70486e-19	1.55017e-20
1105	1.01061e-19	3.87545e-22	5.45772e-19	5.17051e-21	5.56948e-19	1.50912e-20
1106	1.1482e-19	4.55345e-22	5.9986e-19	5.47088e-21	5.32798e-19	1.44575e-20
1107	1.3067e-19	5.32921e-22	6.42694e-19	5.6894e-21	5.02736e-19	1.36169e-20
1108	1.58713e-19	6.62857e-22	7.20773e-19	6.14679e-21	4.7421e-19	1.28067e-20
1109	1.8049e-19	7.88779e-22	7.84786e-19	6.49064e-21	4.58416e-19	1.24402e-20
1110	2.04699e-19	9.39551e-22	8.52371e-19	6.7781e-21	4.38178e-19	1.18277e-20
1111	2.30938e-19	1.07153e-21	9.20478e-19	7.08614e-21	4.10678e-19	1.10926e-20
1112	2.58863e-19	1.23229e-21	9.87916e-19	7.37783e-21	3.77752e-19	1.02555e-20
1113	2.88523e-19	1.42269e-21	1.05712e-18	7.716e-21	3.44241e-19	9.35066e-21
1114	3.19461e-19	1.59395e-21	1.13325e-18	8.08455e-21	3.14392e-19	8.50784e-21
1115	3.5056e-19	1.74453e-21	1.21475e-18	8.44256e-21	2.90891e-19	7.89597e-21
1116	3.81536e-19	1.90897e-21	1.29777e-18	8.85611e-21	2.74557e-19	7.48613e-21
1117	4.1183e-19	2.09816e-21	1.38293e-18	9.35724e-21	2.65348e-19	7.27349e-21
1118	4.40685e-19	2.25407e-21	1.44418e-18	9.82309e-21	2.62568e-19	7.14175e-21
1119	4.68446e-19	2.37426e-21	1.47736e-18	1.016e-20	2.65011e-19	7.21672e-21
1120	4.94266e-19	2.53263e-21	1.54436e-18	1.08558e-20	2.71755e-19	7.45833e-21
1121	5.14874e-19	2.62697e-21	1.61678e-18	1.19117e-20	2.82442e-19	7.76165e-21
1122	5.36026e-19	2.73703e-21	1.7176e-18	1.3778e-20	3.04372e-19	8.3618e-21
1123	5.5093e-19	2.81759e-21	1.77878e-18	1.52765e-20	3.22411e-19	8.87133e-21
1124	5.76076e-19	2.94672e-21	1.83672e-18	1.68681e-20	3.43216e-19	9.36784e-21
1125	5.9255e-19	3.0334e-21	1.89148e-18	1.83129e-20	3.6652e-19	1.00162e-20
1126	6.05215e-19	3.13717e-21	1.94464e-18	2.04235e-20	3.9215e-19	1.07787e-20
1127	6.13954e-19	3.14461e-21	1.99381e-18	2.22833e-20	4.2011e-19	1.15218e-20
1128	6.09453e-19	3.08851e-21	2.03865e-18	2.44524e-20	4.4983e-19	1.23738e-20
1129	5.96492e-19	3.03151e-21	2.07788e-18	2.65066e-20	4.81547e-19	1.31857e-20
1130	5.89758e-19	3.01753e-21	2.10993e-18	2.82976e-20	5.14902e-19	1.40429e-20
1131	5.89541e-19	3.01237e-21	2.12158e-18	2.90118e-20	5.48916e-19	1.50429e-20
1132	5.87553e-19	3.03571e-21	2.09043e-18	2.713e-20	5.82579e-19	1.59482e-20
1133	5.80369e-19	2.97693e-21	2.00385e-18	2.23303e-20	6.15417e-19	1.68234e-20
1134	5.66416e-19	2.90971e-21	1.92334e-18	1.93208e-20	6.4713e-19	1.77142e-20
1135	5.3765e-19	2.7762e-21	1.88394e-18	1.76436e-20	6.91554e-19	1.88884e-20
1136	5.18055e-19	2.71284e-21	1.89212e-18	1.75995e-20	7.17866e-19	1.95551e-20
1137	4.93842e-19	2.56756e-21	1.85494e-18	1.61168e-20	7.40851e-19	2.01977e-20
1138	4.52732e-19	2.35201e-21	1.73447e-18	1.30486e-20	7.61492e-19	2.06895e-20
1139	4.15628e-19	2.10736e-21	1.58459e-18	1.09014e-20	7.80139e-19	2.11803e-20
1140	3.94533e-19	1.97794e-21	1.43397e-18	9.65064e-21	7.91963e-19	2.15114e-20
1141	3.84543e-19	1.92519e-21	1.29579e-18	8.89775e-21	7.90889e-19	2.15657e-20
1142	3.78607e-19	1.92216e-21	1.1742e-18	8.35009e-21	7.85436e-19	2.14661e-20
1143	3.74145e-19	1.88807e-21	1.06859e-18	7.88889e-21	7.81226e-19	2.14185e-20
1144	3.68915e-19	1.85079e-21	9.8072e-19	7.50463e-21	7.75354e-19	2.12094e-20
1145	3.63291e-19	1.81504e-21	9.17783e-19	7.17497e-21	7.65668e-19	2.09098e-20
1146	3.58508e-19	1.81834e-21	8.67482e-19	6.95922e-21	7.52474e-19	2.06399e-20
1147	3.55965e-19	1.81355e-21	7.78494e-19	6.68045e-21	7.37195e-19	2.03342e-20
1148	3.56922e-19	1.81281e-21	6.98718e-19	6.1283e-21	7.22339e-19	1.99146e-20
1149	3.67059e-19	1.88974e-21	6.34034e-19	5.76828e-21	7.0606e-19	1.94744e-20
1150	3.80085e-19	1.96694e-21	5.99453e-19	5.57167e-21	7.01177e-19	1.9331e-20
1151	3.98145e-19	2.08985e-21	5.68546e-19	5.40912e-21	7.01929e-19	1.93255e-20
1152	4.20744e-19	2.20474e-21	5.38537e-19	5.26125e-21	7.07593e-19	1.94792e-20
1153	4.4793e-19	2.38126e-21	5.06584e-19	5.06573e-21	7.17685e-19	1.97617e-20
1154	4.79713e-19	2.56823e-21	4.74451e-19	4.87405e-21	7.31304e-19	2.01646e-20
1155	5.17429e-19	2.78539e-21	4.4582e-19	4.71663e-21	7.45551e-19	2.05042e-20
1156	5.59482e-19	3.0404e-21	4.21037e-19	4.5787e-21	7.57292e-19	2.08397e-20
1157	6.0372e-19	3.30984e-21	3.99631e-19	4.44833e-21	7.70055e-19	2.11507e-20
1158	6.60069e-19	3.65159e-21	3.80987e-19	4.34479e-21	7.86092e-19	2.15408e-20
1159	7.29587e-19	3.99959e-21	3.6465e-19	4.26495e-21	8.03193e-19	2.19566e-20
1160	7.85057e-19	4.19023e-21	3.50293e-19	4.19225e-21	8.16368e-19	2.23296e-20
1161	8.35263e-19	4.49796e-21	3.36635e-19	4.09257e-21	8.19866e-19	2.23873e-20
1162	9.39186e-19	5.01221e-21	3.14477e-19	3.95108e-21	8.06124e-19	2.18874e-20
1163	1.02045e-18	5.35455e-21	3.03792e-19	3.90907e-21	7.97583e-19	2.16736e-20
1164	1.10872e-18	5.67942e-21	2.99223e-19	3.89534e-21	7.90778e-19	2.15397e-20
1165	1.20315e-18	6.00732e-21	3.0207e-19	3.92407e-21	7.84852e-19	2.13604e-20
1166	1.30015e-18	6.28769e-21	2.99913e-19	3.89346e-21	7.74168e-19	2.09918e-20
1167	1.39162e-18	6.58155e-21	2.78544e-19	3.77802e-21	7.43139e-19	2.00717e-20
1168	1.48494e-18	6.94219e-21	2.636e-19	3.69092e-21	6.97981e-19	1.8853e-20
1169	1.5731e-18	7.48455e-21	2.62415e-19	3.6957e-21	6.638e-19	1.79579e-20
1170	1.64666e-18	8.07683e-21	2.61621e-19	3.67772e-21	6.38146e-19	1.72376e-20
1171	1.69957e-18	8.56431e-21	2.5706e-19	3.67397e-21	6.11808e-19	1.65519e-20
1172	1.7515e-18	9.16168e-21	2.48473e-19	3.64055e-21	5.81215e-19	1.56973e-20
1173	1.81442e-18	1.01903e-20	2.3805e-19	3.58224e-21	5.46358e-19	1.47488e-20
1174	1.87636e-18	1.15742e-20	2.27675e-19	3.5776e-21	5.09996e-19	1.37498e-20
1175	1.92574e-18	1.26713e-20	2.18587e-19	3.55997e-21	4.7533e-19	1.27868e-20
1176	1.96081e-18	1.37356e-20	2.08923e-19	3.42973e-21	4.32407e-19	1.17403e-20
1177	1.95597e-18	1.3588e-20	2.05761e-19	3.41505e-21	4.10668e-19	1.11926e-20
1178	1.92694e-18	1.27175e-20	2.04774e-19	3.40098e-21	3.93796e-19	1.06771e-20
1179	1.89147e-18	1.2054e-20	2.05706e-19	3.40851e-21	3.80388e-19	1.03239e-20
1180	1.86931e-18	1.13822e-20	2.08737e-19	3.43581e-21	3.69003e-19	1.00498e-20
1181	1.84516e-18	1.08692e-20	2.13744e-19	3.47319e-21	3.59871e-19	9.80619e-21
1182	1.79464e-18	9.78255e-21	2.20634e-19	3.50706e-21	3.54008e-19	9.639e-21
1183	1.71508e-18	8.71924e-21	2.2967e-19	3.5684e-21	3.51721e-19	9.62369e-21
1184	1.60257e-18	7.55772e-21	2.41279e-19	3.62989e-21	3.53681e-19	9.7291e-21
1185	1.46872e-18	6.83329e-21	2.5568e-19	3.71307e-21	3.60134e-19	9.88444e-21
1186	1.33532e-18	6.30673e-21	2.73134e-19	3.82533e-21	3.70927e-19	1.0167e-20
1187	1.23262e-18	5.8872e-21	2.93875e-19	4.01562e-21	3.85779e-19	1.05465e-20
1188	1.17424e-18	5.70451e-21	3.17507e-19	4.12436e-21	4.04264e-19	1.10609e-20
1189	9.51931e-19	5.33636e-21	3.58512e-19	4.33405e-21	4.38163e-19	1.20319e-20
1190	8.23037e-19	4.36211e-21	3.89587e-19	4.51376e-21	4.64775e-19	1.27941e-20
1191	7.48287e-19	3.88341e-21	4.23429e-19	4.70781e-21	4.94655e-19	1.36008e-20
1192	6.96063e-19	3.59035e-21	4.60224e-19	4.92604e-21	5.28547e-19	1.45444e-20
1193	6.52525e-19	3.36181e-21	5.00342e-19	5.14924e-21	5.67997e-19	1.56563e-20
1194	6.10483e-19	3.14897e-21	5.43822e-19	5.39338e-21	6.15998e-19	1.70366e-20
1195	5.65882e-19	2.91766e-21	5.89691e-19	5.64189e-21	6.76442e-19	1.87111e-20
1196	5.18456e-19	2.66697e-21	6.36852e-19	5.88323e-21	7.48447e-19	2.06561e-20
1197	4.70349e-19	2.40376e-21	6.82767e-19	6.14572e-21	8.21229e-19	2.27146e-20
1198	4.23432e-19	2.14905e-21	7.23029e-19	6.36843e-21	8.91212e-19	2.47653e-20
1199	3.79241e-19	1.89426e-21	7.56235e-19	6.50694e-21	9.75292e-19	2.71005e-20
1200	3.40176e-19	1.66369e-21	7.76092e-19	6.55968e-21	1.07916e-18	3.00084e-20
1201	3.07589e-19	1.46084e-21	7.8368e-19	6.58453e-21	1.1984e-18	3.34094e-20
1202	2.81648e-19	1.31606e-21	7.87442e-19	6.62595e-21	1.32874e-18	3.72167e-20
1203	2.54101e-19	1.15327e-21	8.04836e-19	6.7423e-21	1.53852e-18	4.33695e-20
1204	2.42054e-19	1.08551e-21	8.32897e-19	6.86522e-21	1.68884e-18	4.79444e-20
1205	2.33826e-19	1.04474e-21	8.34247e-19	6.87703e-21	1.85274e-18	5.28607e-20
1206	2.28661e-19	9.97073e-22	7.6693e-19	6.62162e-21	2.03699e-18	5.86376e-20
1207	2.25979e-19	9.80404e-22	7.19528e-19	6.27798e-21	2.24753e-18	6.53982e-20
1208	2.25133e-19	9.63983e-22	7.0573e-19	6.1892e-21	2.48721e-18	7.37134e-20
1209	2.25383e-19	9.72498e-22	6.93367e-19	6.14139e-21	2.74479e-18	8.35348e-20
1210	2.26625e-19	9.89869e-22	6.67369e-19	5.99862e-21	2.96781e-18	9.39686e-20
1211	2.28863e-19	1.01435e-21	6.25107e-19	5.83854e-21	3.07169e-18	9.9339e-20
1212	2.3174e-19	1.05547e-21	5.72255e-19	5.6373e-21	3.10207e-18	1.00613e-19
1213	2.35156e-19	1.08118e-21	5.16743e-19	5.29623e-21	3.10131e-18	1.00614e-19
1214	2.3905e-19	1.06612e-21	4.67238e-19	4.95384e-21	3.07854e-18	9.93738e-20
1215	2.43512e-19	1.07403e-21	4.27262e-19	4.70445e-21	3.04802e-18	9.76695e-20
1216	2.51566e-19	1.10939e-21	3.78301e-19	4.41643e-21	2.94492e-18	9.28619e-20
1217	2.57796e-19	1.14306e-21	3.49764e-19	4.26178e-21	2.84667e-18	8.8469e-20
1218	2.64462e-19	1.18021e-21	3.28917e-19	4.1529e-21	2.72447e-18	8.33065e-20
1219	2.70849e-19	1.2131e-21	3.15247e-19	4.06372e-21	2.58189e-18	7.74755e-20
1220	2.73709e-19	1.21221e-21	3.05142e-19	4.01556e-21	2.43598e-18	7.206e-20
1221	2.74842e-19	1.2078e-21	2.96395e-19	3.9615e-21	2.30138e-18	6.74063e-20
1222	2.76004e-19	1.21706e-21	2.88361e-19	3.91354e-21	2.18481e-18	6.33376e-20
1223	2.77647e-19	1.23452e-21	2.81724e-19	3.87524e-21	2.08054e-18	5.97791e-20
1224	2.78623e-19	1.24795e-21	2.77304e-19	3.86652e-21	1.97393e-18	5.63211e-20
1225	2.78303e-19	1.28949e-21	2.75474e-19	3.93787e-21	1.87315e-18	5.31838e-20
1226	2.75499e-19	1.26557e-21	2.76118e-19	3.90338e-21	1.78748e-18	5.04862e-20
1227	2.70502e-19	1.19658e-21	2.79581e-19	3.87698e-21	1.70243e-18	4.77654e-20
1228	2.6298e-19	1.14886e-21	2.86048e-19	3.90579e-21	1.60615e-18	4.48439e-20
1229	2.55513e-19	1.1106e-21	2.95171e-19	3.95578e-21	1.53205e-18	4.28253e-20
1230	2.42266e-19	1.03934e-21	3.12916e-19	4.06731e-21	1.47203e-18	4.09796e-20
1231	2.3343e-19	9.92762e-22	3.26663e-19	4.12309e-21	1.43422e-18	3.97778e-20
1232	2.24434e-19	9.5243e-22	3.41261e-19	4.20296e-21	1.38874e-18	3.84034e-20
1233	2.1414e-19	8.98004e-22	3.56113e-19	4.27705e-21	1.33478e-18	3.67895e-20
1234	2.03003e-19	8.35456e-22	3.7081e-19	4.36623e-21	1.27493e-18	3.50146e-20
1235	1.91337e-19	7.73942e-22	3.85136e-19	4.45861e-21	1.21394e-18	3.32388e-20
1236	1.79926e-19	7.2155e-22	3.99216e-19	4.54113e-21	1.1548e-18	3.15755e-20
1237	1.68625e-19	6.70123e-22	4.13477e-19	4.60168e-21	1.09787e-18	3.00008e-20
1238	1.57267e-19	6.14576e-22	4.2772e-19	4.69079e-21	1.04011e-18	2.83242e-20
1239	1.46371e-19	5.76168e-22	4.40655e-19	4.76354e-21	9.74197e-19	2.63951e-20
1240	1.361e-19	5.30833e-22	4.49364e-19	4.79332e-21	8.97779e-19	2.4272e-20
1241	1.26614e-19	4.92606e-22	4.48743e-19	4.77375e-21	8.28211e-19	2.23734e-20
1242	1.17975e-19	4.52066e-22	4.35835e-19	4.71796e-21	7.71449e-19	2.08946e-20
1243	1.06607e-19	4.17917e-22	4.0512e-19	4.59428e-21	6.96392e-19	1.8822e-20
1244	1.00049e-19	3.86259e-22	3.84553e-19	4.52301e-21	6.46715e-19	1.7418e-20
1245	9.4136e-20	3.74151e-22	3.64852e-19	4.3321e-21	5.96792e-19	1.61325e-20
1246	8.91207e-20	3.81543e-22	3.45241e-19	4.19671e-21	5.49463e-19	1.48869e-20
1247	8.49434e-20	3.68834e-22	3.25728e-19	4.09648e-21	5.06247e-19	1.37649e-20
1248	8.15494e-20	3.55213e-22	3.0573e-19	3.98934e-21	4.68355e-19	1.27639e-20
1249	7.8827e-20	3.55797e-22	2.84516e-19	3.86796e-21	4.36121e-19	1.1867e-20
1250	7.67001e-20	3.60162e-22	2.62676e-19	3.74168e-21	4.08972e-19	1.11152e-20
1251	7.51328e-20	3.56392e-22	2.41355e-19	3.62913e-21	3.86458e-19	1.05211e-20
1252	7.40788e-20	3.58248e-22	2.21286e-19	3.51365e-21	3.68946e-19	1.00659e-20
1253	7.3681e-20	3.66416e-22	2.02881e-19	3.41814e-21	3.56438e-19	9.74948e-21
1254	7.38699e-20	3.67354e-22	1.8624e-19	3.32768e-21	3.4866e-19	9.48844e-21
1255	7.47254e-20	3.6731e-22	1.7091e-19	3.2429e-21	3.44673e-19	9.36874e-21
1256	7.61483e-20	3.68754e-22	1.56978e-19	3.17659e-21	3.43423e-19	9.34873e-21
1257	7.964e-20	3.68425e-22	1.39448e-19	3.11804e-21	3.4399e-19	9.35841e-21
1258	8.25726e-20	3.60872e-22	1.30159e-19	3.08812e-21	3.44586e-19	9.34883e-21
1259	8.60775e-20	3.49497e-22	1.22807e-19	3.09793e-21	3.44555e-19	9.32855e-21
1260	9.10295e-20	3.64907e-22	1.17753e-19	3.31518e-21	3.43754e-19	9.12075e-21
1261	9.69822e-20	3.8059e-22	1.13501e-19	3.14686e-21	3.41848e-19	9.12216e-21
1262	1.03798e-19	4.09135e-22	1.1086e-19	2.97903e-21	3.40097e-19	9.194e-21
1263	1.12489e-19	4.34004e-22	1.09948e-19	2.96406e-21	3.40145e-19	9.17444e-21
1264	1.22822e-19	4.73116e-22	1.10479e-19	2.9784e-21	3.43808e-19	9.24947e-21
1265	1.34551e-19	5.33275e-22	1.12441e-19	2.9903e-21	3.47778e-19	9.31965e-21
1266	1.4808e-19	6.31538e-22	1.1599e-19	3.03409e-21	3.36228e-19	8.94827e-21
1267	1.63839e-19	7.3467e-22	1.20918e-19	3.04582e-21	3.12606e-19	8.35036e-21
1268	1.81722e-19	8.29583e-22	1.27365e-19	3.09603e-21	2.96355e-19	7.89035e-21
1269	2.02516e-19	9.8543e-22	1.35158e-19	3.16403e-21	2.83594e-19	7.51308e-21
1270	2.25763e-19	1.16845e-21	1.43987e-19	3.28041e-21	2.71449e-19	7.15051e-21
1271	2.66027e-19	1.3966e-21	1.58287e-19	3.39529e-21	2.53226e-19	6.66412e-21
1272	2.97702e-19	1.69166e-21	1.68189e-19	3.5103e-21	2.40996e-19	6.22958e-21
1273	3.31629e-19	1.71985e-21	1.76789e-19	3.2795e-21	2.29237e-19	6.09328e-21
1274	3.69285e-19	1.90661e-21	1.85183e-19	3.27934e-21	2.18757e-19	5.85106e-21
1275	4.10932e-19	2.16155e-21	1.92733e-19	3.30409e-21	2.1009e-19	5.64989e-21
1276	4.56548e-19	2.4323e-21	1.98875e-19	3.34114e-21	2.03837e-19	5.50817e-21
1277	5.06163e-19	2.71655e-21	2.02309e-19	3.34554e-21	2.00299e-19	5.399e-21
1278	5.57838e-19	3.00045e-21	2.02286e-19	3.35469e-21	1.99547e-19	5.35897e-21
1279	6.11702e-19	3.30157e-21	2.01424e-19	3.35949e-21	2.01569e-19	5.42833e-21
1280	6.68823e-19	3.66741e-21	2.01996e-19	3.40383e-21	2.05977e-19	5.49015e-21
1281	7.2752e-19	3.95153e-21	2.0303e-19	3.3756e-21	2.12009e-19	5.67622e-21
1282	7.85615e-19	4.1664e-21	2.01906e-19	3.34898e-21	2.18871e-19	5.88015e-21
1283	8.43856e-19	4.43097e-21	1.97913e-19	3.32605e-21	2.25762e-19	6.0371e-21
1284	9.30092e-19	4.81184e-21	1.88461e-19	3.292e-21	2.33751e-19	6.23354e-21
1285	9.8532e-19	5.04937e-21	1.80669e-19	3.23846e-21	2.36757e-19	6.28572e-21
1286	1.03662e-18	5.24236e-21	1.72298e-19	3.19804e-21	2.38232e-19	6.33006e-21
1287	1.07839e-18	5.48097e-21	1.64095e-19	3.35572e-21	2.39154e-19	6.23567e-21
1288	1.10274e-18	5.64755e-21	1.55586e-19	3.40079e-21	2.40479e-19	6.20547e-21
1289	1.11189e-18	5.57153e-21	1.47076e-19	3.18072e-21	2.42728e-19	6.34238e-21
1290	1.11368e-18	5.50507e-21	1.39762e-19	3.09421e-21	2.43418e-19	6.39296e-21
1291	1.11529e-18	5.56167e-21	1.33422e-19	3.07376e-21	2.35934e-19	6.17668e-21
1292	1.11745e-18	5.5e-21	1.27909e-19	2.96792e-21	2.20997e-19	5.85079e-21
1293	1.10426e-18	5.4203e-21	1.23461e-19	2.93789e-21	2.07795e-19	5.50234e-21
1294	1.07712e-18	5.3291e-21	1.19816e-19	2.91004e-21	1.98736e-19	5.24292e-21
1295	1.05297e-18	5.26519e-21	1.16854e-19	2.89682e-21	1.90015e-19	5.01999e-21
1296	1.00715e-18	5.14522e-21	1.14476e-19	2.92752e-21	1.79671e-19	4.7454e-21
1297	9.34268e-19	4.98001e-21	1.12544e-19	3.01317e-21	1.67468e-19	4.36025e-21
1298	8.25924e-19	4.3639e-21	1.0937e-19	2.84611e-21	1.47691e-19	3.9023e-21
1299	7.65004e-19	4.04342e-21	1.07649e-19	2.82984e-21	1.35455e-19	3.61849e-21
1300	7.11494e-19	3.75868e-21	1.05935e-19	2.81223e-21	1.24831e-19	3.35622e-21
1301	6.63778e-19	3.52779e-21	1.04326e-19	2.81785e-21	1.16313e-19	3.13298e-21
1302	6.20439e-19	3.28187e-21	1.02739e-19	2.81873e-21	1.09633e-19	2.94051e-21
1303	5.80577e-19	3.07792e-21	1.00385e-19	2.80055e-21	1.04475e-19	2.82407e-21
1304	5.44005e-19	2.88e-21	9.73592e-20	2.78823e-21	1.00832e-19	2.72427e-21
1305	5.11179e-19	2.70143e-21	9.43657e-20	2.78755e-21	9.84596e-20	2.65364e-21
1306	4.82225e-19	2.53831e-21	9.16953e-20	2.77826e-21	9.70973e-20	2.63762e-21
1307	4.57474e-19	2.38976e-21	8.90218e-20	2.75648e-21	9.65482e-20	2.62499e-21
1308	4.37497e-19	2.38219e-21	8.66887e-20	2.92893e-21	9.67003e-20	2.56595e-21
1309	4.21051e-19	2.2868e-21	8.38037e-20	2.84946e-21	9.7091e-20	2.59208e-21
1310	4.08234e-19	2.10308e-21	8.09441e-20	2.70704e-21	9.78072e-20	2.65961e-21
1311	3.94351e-19	2.00688e-21	7.75803e-20	2.71848e-21	9.97306e-20	2.69965e-21
1312	3.87662e-19	2.25807e-21	7.61224e-20	3.16623e-21	1.01774e-19	2.59487e-21
1313	3.80854e-19	2.42432e-21	7.2944e-20	3.29022e-21	1.03615e-19	2.54296e-21
1314	3.73211e-19	2.17522e-21	6.87576e-20	3.05663e-21	1.04784e-19	2.64369e-21
1315	3.64871e-19	2.06908e-21	6.55503e-20	2.89868e-21	1.05669e-19	2.70485e-21
1316	3.5524e-19	1.85871e-21	6.30821e-20	2.79888e-21	1.06483e-19	2.76634e-21
1317	3.4586e-19	2.16305e-21	6.19167e-20	3.269e-21	1.07397e-19	2.66291e-21
1318	3.35092e-19	1.90807e-21	5.9109e-20	3.02011e-21	1.07244e-19	2.72413e-21
1319	3.24782e-19	2.20584e-21	5.78719e-20	3.68034e-21	1.07131e-19	2.58857e-21
1320	3.11874e-19	1.92675e-21	5.39498e-20	3.17855e-21	1.05329e-19	2.60944e-21
1321	2.96364e-19	1.6428e-21	5.02463e-20	2.84021e-21	1.03234e-19	2.65779e-21
1322	2.77916e-19	1.34574e-21	4.66739e-20	2.57412e-21	1.00423e-19	2.7045e-21
1323	2.60579e-19	1.23743e-21	4.37437e-20	2.57795e-21	9.70482e-20	2.60734e-21
1324	2.43387e-19	1.17244e-21	4.09115e-20	2.5844e-21	9.26788e-20	2.48579e-21
1325	2.18207e-19	9.73742e-22	3.669e-20	2.47811e-21	8.54244e-20	2.35021e-21
1326	2.01402e-19	8.89329e-22	3.42801e-20	2.4752e-21	8.07096e-20	2.26315e-21
1327	1.84445e-19	7.98921e-22	3.20349e-20	2.46577e-21	7.60242e-20	2.14777e-21
1328	1.6751e-19	7.15877e-22	3.00305e-20	2.46547e-21	7.12441e-20	2.01915e-21
1329	1.50998e-19	6.28054e-22	2.82718e-20	2.4597e-21	6.65283e-20	1.92314e-21
1330	1.35211e-19	5.79942e-22	2.6853e-20	2.52889e-21	6.19446e-20	1.83673e-21
1331	1.20182e-19	4.78622e-22	2.5057e-20	2.43485e-21	5.77403e-20	1.74982e-21
1332	1.06532e-19	4.20159e-22	2.34033e-20	2.4092e-21	5.40167e-20	1.69214e-21
1333	9.37412e-20	3.63977e-22	2.21208e-20	2.4144e-21	5.07462e-20	1.64746e-21
1334	8.23687e-20	3.32912e-22	2.12014e-20	2.42073e-21	4.81465e-20	1.60832e-21
1335	7.25006e-20	3.01207e-22	2.06139e-20	2.42734e-21	4.62719e-20	1.57665e-21
1336	6.42096e-20	2.60009e-22	2.08355e-20	2.73889e-21	4.53221e-20	1.60825e-21
1337	5.76106e-20	8.16531e-22	2.21434e-20	3.45085e-21	4.51781e-20	1.87188e-21
1338	4.88003e-20	9.09202e-22	2.29917e-20	3.84044e-21	4.55751e-20	2.00904e-21
1339	4.51506e-20	1.99356e-21	2.51472e-20	4.67503e-21	4.71508e-20	2.6357e-21
1340	4.16885e-20	2.26589e-21	2.66442e-20	5.14544e-21	4.90356e-20	2.96176e-21
1341	3.6561e-20	9.83637e-22	2.41238e-20	3.37993e-21	4.98901e-20	1.86974e-21
1342	3.27793e-20	2.19598e-22	2.31129e-20	2.45245e-21	5.21258e-20	1.66948e-21
1343	3.07551e-20	2.9476e-22	2.42938e-20	2.4169e-21	5.56826e-20	1.76622e-21
1344	2.93095e-20	2.7853e-22	2.58931e-20	2.43816e-21	6.00371e-20	1.83573e-21
1345	2.8552e-20	2.83666e-22	2.76409e-20	2.42355e-21	6.51097e-20	1.93588e-21
1346	2.79033e-20	2.89002e-22	2.94994e-20	2.42513e-21	7.07428e-20	2.06022e-21
1347	2.73616e-20	3.08543e-22	3.14092e-20	2.41272e-21	7.6848e-20	2.18063e-21
1348	2.71466e-20	2.94814e-22	3.35076e-20	2.44211e-21	8.32958e-20	2.32646e-21
1349	2.72195e-20	1.71561e-22	3.58641e-20	2.70839e-21	8.99477e-20	2.42137e-21
1350	2.74687e-20	1.19282e-22	3.76369e-20	2.75752e-21	9.64432e-20	2.52061e-21
1351	2.73423e-20	2.72469e-22	3.88268e-20	2.46615e-21	1.02514e-19	2.79036e-21
1352	2.78857e-20	2.70491e-22	4.24744e-20	2.47813e-21	1.11221e-19	3.01463e-21
1353	2.82429e-20	2.87838e-22	4.3811e-20	2.4679e-21	1.16164e-19	3.12846e-21
1354	2.88298e-20	1.64413e-22	4.32405e-20	2.73618e-21	1.20543e-19	3.1369e-21
1355	2.97832e-20	3.76692e-22	4.2897e-20	3.06904e-21	1.24304e-19	3.06804e-21
1356	2.95457e-20	1.80878e-22	4.13232e-20	2.51659e-21	1.26708e-19	3.35059e-21
1357	2.978e-20	2.62793e-22	4.03621e-20	2.49346e-21	1.28713e-19	3.43283e-21
1358	3.03851e-20	1.28204e-22	4.0396e-20	2.69574e-21	1.30031e-19	3.35243e-21
1359	3.05254e-20	1.76227e-22	3.92715e-20	2.51429e-21	1.302e-19	3.41759e-21
1360	3.06858e-20	2.17921e-22	3.81559e-20	2.62265e-21	1.3005e-19	3.41305e-21
1361	3.18575e-20	6.81198e-22	3.89528e-20	3.81262e-21	1.30638e-19	3.0917e-21
1362	3.22107e-20	8.72848e-22	3.65604e-20	3.60004e-21	1.29556e-19	3.03493e-21
1363	3.34792e-20	2.07922e-21	3.88671e-20	5.8968e-21	1.306e-19	3.27367e-21
1364	3.27912e-20	1.54914e-21	3.20903e-20	3.91286e-21	1.27464e-19	2.88451e-21
1365	3.03734e-20	2.31424e-22	2.52478e-20	2.40568e-21	1.25802e-19	3.31171e-21
1366	2.98431e-20	2.77994e-22	2.27778e-20	2.35861e-21	1.25475e-19	3.34859e-21
1367	2.92914e-20	2.76406e-22	2.08301e-20	2.38414e-21	1.25648e-19	3.35123e-21
1368	2.92536e-20	2.62539e-22	2.08398e-20	3.19411e-21	1.27212e-19	3.12481e-21
1369	2.91883e-20	6.87377e-22	1.9775e-20	3.29121e-21	1.29119e-19	3.03352e-21
1370	2.77541e-20	1.36491e-22	1.70827e-20	2.46748e-21	1.316e-19	3.42591e-21
1371	2.70847e-20	2.14269e-22	1.62327e-20	2.39638e-21	1.35471e-19	3.58002e-21
1372	2.6741e-20	1.25957e-22	1.61147e-20	2.57629e-21	1.39513e-19	3.5902e-21
1373	2.66825e-20	3.7747e-22	1.7422e-20	3.39649e-21	1.4255e-19	3.40622e-21
1374	2.79037e-20	1.66969e-21	2.07819e-20	5.07445e-21	1.44679e-19	3.25239e-21
1375	2.74269e-20	1.51997e-21	2.01954e-20	4.70368e-21	1.44673e-19	3.20475e-21
1376	2.61776e-20	6.22897e-22	1.73468e-20	3.17704e-21	1.43315e-19	3.31844e-21
1377	2.49114e-20	1.98744e-22	1.59406e-20	2.44483e-21	1.42331e-19	3.70067e-21
1378	2.49829e-20	2.47891e-22	1.71642e-20	2.92161e-21	1.41298e-19	3.50277e-21
1379	2.43627e-20	2.01571e-22	1.73056e-20	2.72749e-21	1.36402e-19	3.40776e-21
1380	2.4095e-20	1.51804e-22	1.74428e-20	2.59893e-21	1.31429e-19	3.32845e-21
1381	2.34843e-20	2.4293e-22	1.73216e-20	2.34872e-21	1.25494e-19	3.27709e-21
1382	2.34693e-20	2.05445e-22	1.77784e-20	2.38589e-21	1.18653e-19	3.09307e-21
1383	2.34451e-20	2.50702e-22	1.81028e-20	2.34493e-21	1.10405e-19	2.91586e-21
1384	2.35101e-20	2.84518e-22	1.85082e-20	2.32342e-21	1.01343e-19	2.6912e-21
1385	2.37635e-20	2.6493e-22	1.89914e-20	2.36002e-21	9.22664e-20	2.46468e-21
1386	2.46303e-20	2.81893e-22	2.09323e-20	3.14467e-21	8.47141e-20	2.20513e-21
1387	2.66206e-20	1.59079e-21	2.51992e-20	5.07154e-21	7.8863e-20	2.74064e-21
1388	2.78308e-20	1.83865e-21	2.50488e-20	4.45208e-21	6.92367e-20	2.59101e-21
1389	2.65454e-20	2.62855e-22	2.19532e-20	2.61105e-21	6.12275e-20	1.75381e-21
1390	2.69752e-20	1.66732e-22	2.23968e-20	2.49555e-21	5.46669e-20	1.67926e-21
1391	2.8417e-20	1.40383e-22	2.35851e-20	2.668e-21	4.87445e-20	1.62533e-21
1392	3.06762e-20	1.77864e-22	2.46195e-20	2.48223e-21	4.15548e-20	1.52939e-21
1393	3.28659e-20	1.55462e-22	2.65978e-20	2.93225e-21	3.9111e-20	1.62819e-21
1394	3.6524e-20	1.36982e-21	3.2806e-20	5.53528e-21	3.9699e-20	3.17093e-21
1395	4.14037e-20	2.36092e-21	3.4733e-20	5.41118e-21	3.83485e-20	3.55502e-21
1396	4.34502e-20	1.63439e-21	3.43098e-20	4.47518e-21	3.83407e-20	2.70813e-21
1397	4.52322e-20	6.60335e-22	3.33325e-20	3.41079e-21	3.90326e-20	1.84957e-21
1398	4.95398e-20	1.41944e-21	3.63824e-20	4.36389e-21	4.15716e-20	2.45993e-21
1399	5.33092e-20	1.89252e-21	4.02637e-20	5.89717e-21	4.44083e-20	3.49527e-21
1400	5.67428e-20	1.33154e-21	3.73738e-20	3.68262e-21	4.47353e-20	2.16035e-21
1401	5.72753e-20	2.61044e-22	3.57111e-20	2.6187e-21	4.6005e-20	1.54529e-21
1402	5.88366e-20	2.3905e-22	3.62367e-20	2.48613e-21	4.74938e-20	1.56958e-21
1403	6.00357e-20	2.38734e-22	3.74863e-20	2.53503e-21	4.89797e-20	1.60291e-21
1404	6.12172e-20	3.08685e-22	3.96387e-20	2.97221e-21	5.07059e-20	1.69141e-21
1405	6.37702e-20	1.39349e-21	4.4828e-20	5.07999e-21	5.3498e-20	2.74789e-21
1406	6.72935e-20	4.75386e-22	4.13933e-20	2.74833e-21	5.21727e-20	1.67512e-21
1407	7.16239e-20	2.81831e-22	4.17071e-20	2.50608e-21	5.08354e-20	1.64451e-21
1408	7.39733e-20	2.87468e-22	4.313e-20	2.50507e-21	4.92933e-20	1.59363e-21
1409	6.93535e-20	2.71012e-22	4.45996e-20	2.61782e-21	4.84e-20	1.59139e-21
1410	6.62538e-20	4.21833e-22	4.58327e-20	2.89221e-21	4.76047e-20	1.61448e-21
1411	6.59112e-20	4.0562e-22	4.59113e-20	2.91926e-21	4.6252e-20	1.61842e-21
1412	6.73027e-20	7.01975e-22	4.59262e-20	3.17298e-21	4.4317e-20	1.70953e-21
1413	6.7799e-20	2.93222e-22	4.3789e-20	2.58966e-21	4.12713e-20	1.49113e-21
1414	6.78893e-20	2.72242e-22	4.2613e-20	2.50589e-21	3.84923e-20	1.4512e-21
1415	6.73203e-20	2.78602e-22	4.2244e-20	2.6566e-21	3.59291e-20	1.49687e-21
1416	6.64017e-20	7.07631e-22	4.37038e-20	3.45948e-21	3.42144e-20	1.83691e-21
1417	6.47894e-20	1.35568e-21	4.56888e-20	4.39135e-21	3.28615e-20	2.49846e-21
1418	6.26831e-20	2.0881e-21	4.65343e-20	5.02229e-21	3.09858e-20	3.15505e-21
1419	6.14186e-20	3.90253e-21	5.28792e-20	9.8082e-21	3.25394e-20	6.97774e-21
1420	5.49529e-20	2.17598e-21	3.84287e-20	4.10477e-21	2.52344e-20	3.06935e-21
1421	5.03021e-20	4.98308e-22	3.51904e-20	2.94282e-21	2.43083e-20	1.64816e-21
1422	4.70996e-20	2.13377e-22	3.38423e-20	2.70613e-21	2.35535e-20	1.46981e-21
1423	4.49938e-20	5.76505e-22	3.47961e-20	3.90419e-21	2.39207e-20	2.15779e-21
1424	4.47546e-20	2.43878e-21	3.68823e-20	5.89839e-21	2.41559e-20	4.0798e-21
1425	4.05021e-20	7.31548e-22	2.88072e-20	3.02366e-21	2.13017e-20	1.78632e-21
1426	3.90704e-20	1.62919e-22	2.57014e-20	2.54423e-21	2.09649e-20	1.40125e-21
1427	4.01242e-20	1.69905e-22	2.36443e-20	2.53082e-21	2.07692e-20	1.38361e-21
1428	4.08152e-20	2.69306e-22	2.24988e-20	2.83056e-21	2.07363e-20	1.54835e-21
1429	3.73145e-20	5.02414e-22	2.22652e-20	3.36949e-21	2.08638e-20	1.87547e-21
1430	3.52481e-20	1.39486e-21	2.54044e-20	5.33299e-21	2.19802e-20	3.39245e-21
1431	3.51986e-20	8.48635e-22	2.0999e-20	3.29348e-21	2.0434e-20	2.07343e-21
1432	3.54726e-20	3.11638e-22	1.97823e-20	2.91796e-21	2.09841e-20	1.64005e-21
1433	3.70759e-20	7.64369e-22	2.12712e-20	3.43548e-21	2.25351e-20	1.9774e-21
1434	3.64495e-20	4.04106e-22	2.08828e-20	2.88737e-21	2.32216e-20	1.60876e-21
1435	3.59913e-20	5.79937e-22	2.30702e-20	3.60684e-21	2.5192e-20	1.99545e-21
1436	3.73566e-20	2.32486e-21	3.10383e-20	7.27719e-21	2.95989e-20	4.52511e-21
1437	3.87795e-20	3.5914e-21	3.30792e-20	6.6819e-21	3.02236e-20	5.1677e-21
1438	3.50466e-20	1.03654e-21	2.75939e-20	3.27566e-21	2.97367e-20	2.00967e-21
1439	3.43354e-20	2.02822e-22	2.8222e-20	2.73589e-21	3.14168e-20	1.51155e-21
1440	3.53322e-20	1.52358e-22	3.03813e-20	2.59635e-21	3.33955e-20	1.44195e-21
1441	3.72076e-20	1.51596e-22	3.31264e-20	2.57653e-21	3.56667e-20	1.45078e-21
1442	3.9592e-20	1.6337e-22	3.58991e-20	2.5539e-21	3.81059e-20	1.46486e-21
1443	4.24263e-20	1.7538e-22	3.83995e-20	2.52994e-21	4.06234e-20	1.49535e-21
1444	4.55834e-20	1.80058e-22	4.06902e-20	2.53784e-21	4.29463e-20	1.544e-21
1445	4.86888e-20	2.13399e-22	4.2737e-20	2.66658e-21	4.50166e-20	1.55211e-21
1446	5.26517e-20	2.92249e-22	4.49558e-20	2.91658e-21	4.84665e-20	1.62259e-21
1447	5.5531e-20	8.04737e-22	4.87197e-20	4.29862e-21	5.20795e-20	2.19639e-21
1448	6.01012e-20	2.18843e-21	5.41025e-20	5.53272e-21	5.60721e-20	3.28992e-21
1449	6.06142e-20	7.20916e-22	5.31921e-20	3.03799e-21	5.80555e-20	1.76589e-21
1450	6.21063e-20	2.85682e-22	5.69278e-20	2.76122e-21	6.13532e-20	1.79139e-21
1451	6.56272e-20	3.6151e-22	6.09911e-20	3.04857e-21	6.51655e-20	1.86721e-21
1452	7.24419e-20	1.20503e-21	6.79196e-20	4.17398e-21	7.08323e-20	2.16597e-21
1453	7.99322e-20	8.17883e-22	7.35557e-20	3.21842e-21	7.69965e-20	2.01394e-21
1454	8.35395e-20	7.03913e-22	8.18666e-20	3.54985e-21	8.40812e-20	2.19084e-21
1455	8.69893e-20	2.04559e-21	9.45814e-20	5.81732e-21	9.09768e-20	3.00073e-21
1456	9.28234e-20	3.37484e-21	1.0755e-19	8.15699e-21	9.73442e-20	4.53746e-21
1457	1.0169e-19	5.12699e-21	1.22045e-19	1.13472e-20	1.05613e-19	7.20853e-21
1458	1.09496e-19	5.17432e-21	1.26212e-19	9.45912e-21	1.11088e-19	6.2164e-21
1459	1.12383e-19	4.38051e-21	1.27356e-19	8.64289e-21	1.15613e-19	5.19264e-21
1460	9.95172e-20	1.26385e-21	1.17896e-19	3.80403e-21	1.13912e-19	2.6344e-21
1461	9.25344e-20	5.60367e-22	1.15979e-19	3.19128e-21	1.11781e-19	2.81179e-21
1462	9.08141e-20	4.82698e-22	1.17171e-19	3.12637e-21	1.1019e-19	2.81797e-21
1463	9.69778e-20	5.70176e-22	1.23214e-19	3.34518e-21	1.11487e-19	2.80329e-21
1464	1.04625e-19	1.13882e-21	1.34179e-19	5.2294e-21	1.15557e-19	2.80425e-21
1465	1.00077e-19	2.88938e-21	1.34831e-19	7.4673e-21	1.12473e-19	4.06313e-21
1466	8.98213e-20	1.30055e-21	1.20421e-19	3.81697e-21	1.03873e-19	2.43919e-21
1467	8.76409e-20	5.78938e-22	1.1753e-19	3.28e-21	1.01454e-19	2.53812e-21
1468	8.64501e-20	5.1237e-22	1.15624e-19	3.16194e-21	9.90398e-20	2.52772e-21
1469	8.53129e-20	4.36238e-22	1.12194e-19	3.08056e-21	9.58776e-20	2.48353e-21
1470	8.40726e-20	4.90436e-22	1.07464e-19	3.23238e-21	9.17889e-20	2.34467e-21
1471	8.06146e-20	9.97436e-22	1.04234e-19	4.62797e-21	8.83608e-20	2.37006e-21
1472	7.89395e-20	3.55543e-21	1.08011e-19	9.54369e-21	8.72353e-20	5.64937e-21
1473	7.08676e-20	4.23541e-21	9.59818e-20	9.03233e-21	7.76104e-20	5.8307e-21
1474	6.28226e-20	2.78852e-21	8.16665e-20	5.19657e-21	6.90313e-20	3.17255e-21
1475	5.68546e-20	1.17232e-21	7.56402e-20	4.32794e-21	6.61814e-20	2.23801e-21
1476	5.4885e-20	2.48464e-21	7.79983e-20	7.28642e-21	6.54163e-20	4.13161e-21
1477	4.92326e-20	1.67321e-21	6.81595e-20	3.94405e-21	5.83224e-20	2.21596e-21
1478	4.45964e-20	3.46119e-22	6.2731e-20	2.93215e-21	5.557e-20	1.70951e-21
1479	4.05349e-20	1.8772e-22	5.51669e-20	2.77487e-21	5.18379e-20	1.64843e-21
1480	3.69727e-20	2.05799e-22	4.9084e-20	2.90115e-21	4.79671e-20	1.63593e-21
1481	3.50174e-20	8.95048e-22	4.78775e-20	4.19504e-21	4.55102e-20	2.18248e-21
1482	3.24558e-20	9.89429e-22	4.30487e-20	3.57818e-21	4.11281e-20	1.91702e-21
1483	2.92349e-20	1.82119e-22	3.81201e-20	2.73911e-21	3.77253e-20	1.48541e-21
1484	2.70779e-20	1.17383e-22	3.49787e-20	2.69657e-21	3.46914e-20	1.44696e-21
1485	2.52172e-20	1.32175e-22	3.23129e-20	2.78996e-21	3.17948e-20	1.48682e-21
1486	2.4074e-20	6.16084e-22	3.1255e-20	3.59669e-21	2.96862e-20	1.89859e-21
1487	2.35544e-20	2.11901e-21	3.35716e-20	6.62384e-21	2.76841e-20	4.3299e-21
1488	2.11529e-20	1.67266e-21	2.72395e-20	4.70068e-21	2.32901e-20	3.14334e-21
1489	2.13751e-20	2.97079e-21	3.07099e-20	7.50045e-21	2.46491e-20	5.06692e-21
1490	2.2308e-20	4.87099e-21	3.27011e-20	9.4658e-21	2.34088e-20	7.3075e-21
1491	1.88498e-20	3.19141e-21	2.4974e-20	6.38966e-21	1.89503e-20	4.94908e-21
1492	1.45983e-20	8.21198e-22	1.71231e-20	3.24022e-21	1.60659e-20	2.00792e-21
1493	1.26898e-20	1.67057e-22	1.50709e-20	2.86334e-21	1.51368e-20	1.60766e-21
1494	1.16747e-20	1.59389e-22	1.42086e-20	2.93188e-21	1.43943e-20	1.62988e-21
1495	1.12662e-20	5.23419e-22	1.51433e-20	3.84293e-21	1.44979e-20	2.24964e-21
1496	1.25906e-20	2.15491e-21	2.20915e-20	7.75787e-21	1.71163e-20	5.30251e-21
1497	1.26962e-20	2.72752e-21	1.76831e-20	5.50536e-21	1.36169e-20	4.54651e-21
1498	1.0083e-20	1.24054e-21	1.54678e-20	4.84243e-21	1.38236e-20	3.21341e-21
1499	1.09971e-20	2.37128e-21	1.98572e-20	7.218e-21	1.50184e-20	5.21936e-21
1500	8.15752e-21	8.26259e-22	1.21403e-20	3.50534e-21	1.21731e-20	2.24121e-21
1501	7.73128e-21	8.25735e-22	1.24459e-20	3.84022e-21	1.25412e-20	2.34498e-21
1502	7.874e-21	1.21084e-21	1.26306e-20	3.98117e-21	1.23962e-20	2.57205e-21
1503	6.52333e-21	4.08346e-22	1.0819e-20	3.22034e-21	1.1743e-20	1.94329e-21
1504	6.51506e-21	6.47685e-22	1.23087e-20	4.10724e-21	1.2263e-20	2.54331e-21
1505	7.9722e-21	2.08049e-21	2.02303e-20	8.32749e-21	1.54722e-20	5.7019e-21
1506	1.40951e-20	6.85214e-21	3.41389e-20	1.51335e-20	1.92502e-20	1.28267e-20
1507	1.7761e-20	9.78952e-21	3.95165e-20	1.76894e-20	2.14503e-20	1.5389e-20
1508	1.50778e-20	8.16268e-21	2.77741e-20	1.17826e-20	1.69291e-20	1.042e-20
1509	1.0446e-20	4.69563e-21	2.06308e-20	8.42375e-21	1.46774e-20	6.80197e-21
1510	9.10745e-21	3.82921e-21	1.7714e-20	7.05875e-21	1.40141e-20	5.37334e-21
1511	6.73758e-21	2.01975e-21	1.2417e-20	4.45782e-21	1.19499e-20	3.09678e-21
1512	5.99028e-21	1.64389e-21	1.4277e-20	5.61074e-21	1.32099e-20	3.6234e-21
1513	6.67956e-21	2.16175e-21	1.30374e-20	4.79897e-21	1.17441e-20	3.49425e-21
1514	4.68686e-21	7.4184e-22	1.10581e-20	4.05051e-21	1.16484e-20	2.41989e-21
1515	6.5848e-21	2.26547e-21	1.45587e-20	5.79462e-21	1.27035e-20	3.98937e-21
1516	7.537e-21	3.09442e-21	1.81867e-20	7.71491e-21	1.42497e-20	5.46765e-21
1517	1.12255e-20	5.92957e-21	2.70176e-20	1.20624e-20	1.65605e-20	9.72168e-21
1518	7.82931e-21	3.00283e-21	1.51352e-20	5.84619e-21	1.12528e-20	4.79618e-21
1519	5.23178e-21	1.1589e-21	1.17009e-20	4.45742e-21	1.12705e-20	2.92584e-21
1520	7.03527e-21	2.74484e-21	1.89932e-20	8.34374e-21	1.43759e-20	5.82932e-21
1521	1.16719e-20	6.25714e-21	2.83093e-20	1.29316e-20	1.69114e-20	1.04689e-20
1522	1.06695e-20	5.28026e-21	2.32852e-20	1.01461e-20	1.39383e-20	8.74572e-21
1523	8.71233e-21	3.78758e-21	1.92164e-20	8.0622e-21	1.22878e-20	6.71332e-21
1524	6.09733e-21	1.86399e-21	1.28429e-20	4.95231e-21	1.06531e-20	3.64003e-21
1525	6.68691e-21	2.56503e-21	1.73966e-20	7.47907e-21	1.317e-20	5.2693e-21
1526	8.05881e-21	3.47697e-21	1.69446e-20	6.94303e-21	1.1552e-20	5.5769e-21
1527	6.28371e-21	2.35618e-21	1.53736e-20	6.30728e-21	1.19024e-20	4.38486e-21
1528	6.34686e-21	2.43817e-21	1.53828e-20	6.18349e-21	1.14863e-20	4.48505e-21
1529	5.11394e-21	1.43164e-21	1.18439e-20	4.28018e-21	9.91836e-21	2.99963e-21
1530	3.57463e-21	3.27984e-22	9.31833e-21	3.0909e-21	9.42572e-21	1.83746e-21
1531	4.00694e-21	8.39097e-22	1.15917e-20	4.2634e-21	1.0585e-20	2.61033e-21
1532	5.33973e-21	1.96572e-21	1.41112e-20	5.40859e-21	1.12492e-20	3.72935e-21
1533	5.8584e-21	2.54396e-21	2.01142e-20	8.53194e-21	1.36536e-20	6.0111e-21
1534	8.52306e-21	4.44897e-21	2.18567e-20	8.91247e-21	1.25382e-20	7.51107e-21
1535	5.02646e-21	1.89656e-21	1.3028e-20	4.60139e-21	1.03627e-20	3.34932e-21
1536	4.07111e-21	1.27989e-21	1.17857e-20	4.04073e-21	1.04711e-20	2.64935e-21
1537	3.23241e-21	7.21855e-22	1.13621e-20	3.84349e-21	1.03976e-20	2.45928e-21
1538	4.03787e-21	1.58431e-21	1.66264e-20	6.58804e-21	1.25191e-20	4.50593e-21
1539	8.53146e-21	5.21616e-21	3.21793e-20	1.44501e-20	1.78466e-20	1.12544e-20
1540	1.33897e-20	8.81808e-21	3.79265e-20	1.68584e-20	1.80665e-20	1.5333e-20
1541	6.84388e-21	4.18382e-21	2.28944e-20	9.48003e-21	1.38095e-20	7.95813e-21
1542	7.31966e-21	4.60691e-21	2.49605e-20	1.05425e-20	1.44496e-20	8.72787e-21
1543	6.13893e-21	3.7861e-21	1.93646e-20	7.66897e-21	1.23247e-20	6.28716e-21
1544	5.23314e-21	3.26493e-21	1.77542e-20	7.01975e-21	1.25152e-20	5.31997e-21
1545	6.33397e-21	4.2601e-21	2.13828e-20	8.94815e-21	1.41938e-20	6.86578e-21
1546	4.12167e-21	2.34764e-21	1.30508e-20	4.56948e-21	1.01909e-20	3.54523e-21
1547	1.62378e-21	4.76659e-22	9.78362e-21	3.1548e-21	9.69797e-21	1.94512e-21
1548	1.31233e-21	2.67095e-22	9.48952e-21	3.08448e-21	9.61921e-21	1.82217e-21
1549	1.86554e-21	7.69066e-22	1.17486e-20	4.33785e-21	1.07339e-20	2.6671e-21
1550	5.17886e-21	3.44985e-21	1.88608e-20	7.93161e-21	1.32498e-20	5.79171e-21
1551	3.63401e-21	2.02269e-21	1.2051e-20	4.37261e-21	1.00354e-20	3.1751e-21
1552	1.61706e-21	4.92344e-22	9.45929e-21	3.27319e-21	9.62439e-21	2.00026e-21
1553	1.73183e-21	5.96422e-22	1.02425e-20	3.75613e-21	1.00098e-20	2.30599e-21
1554	4.85348e-21	3.15084e-21	1.99271e-20	8.77019e-21	1.36555e-20	6.42246e-21
1555	4.34404e-21	2.47061e-21	1.30976e-20	5.06372e-21	1.01865e-20	4.075e-21
1556	2.8151e-21	1.39965e-21	1.23567e-20	4.9734e-21	1.08819e-20	3.41822e-21
1557	3.92679e-21	2.36698e-21	1.99234e-20	9.05255e-21	1.4145e-20	6.33398e-21
1558	1.16568e-20	8.06424e-21	3.97798e-20	1.8827e-20	2.02611e-20	1.60261e-20
1559	1.41207e-20	9.74736e-21	3.82046e-20	1.7737e-20	1.86481e-20	1.62022e-20
1560	1.31618e-20	8.91218e-21	3.64244e-20	1.68095e-20	1.7972e-20	1.47903e-20
1561	5.31597e-21	2.96717e-21	1.36986e-20	5.43687e-21	1.01208e-20	4.88511e-21
1562	2.50368e-21	9.58076e-22	9.81298e-21	3.83885e-21	1.03315e-20	2.58711e-21
1563	1.73362e-21	3.81398e-22	8.50678e-21	3.27809e-21	1.03e-20	1.98526e-21
1564	1.74975e-21	4.58332e-22	9.66956e-21	3.92801e-21	1.09275e-20	2.35754e-21
1565	3.22684e-21	1.56681e-21	1.39245e-20	6.0318e-21	1.21079e-20	4.16106e-21
1566	2.50434e-21	9.16586e-22	9.34519e-21	3.66859e-21	1.0438e-20	2.44004e-21
1567	1.57681e-21	2.41692e-22	7.80111e-21	3.03834e-21	1.04243e-20	1.74984e-21
1568	1.99067e-21	6.3541e-22	1.05328e-20	4.52681e-21	1.1803e-20	2.76511e-21
1569	4.88008e-21	2.96468e-21	2.04707e-20	9.58326e-21	1.52076e-20	7.04922e-21
1570	5.37143e-21	3.07187e-21	1.55298e-20	6.67759e-21	1.17834e-20	5.56413e-21
1571	2.16655e-21	7.59976e-22	8.60002e-21	3.45376e-21	1.07732e-20	2.30091e-21
1572	1.3536e-21	2.10103e-22	7.54675e-21	3.05794e-21	1.09144e-20	1.78938e-21
1573	1.33142e-21	2.3154e-22	7.66305e-21	3.1277e-21	1.0989e-20	1.81019e-21
1574	1.35896e-21	3.0393e-22	8.11522e-21	3.39005e-21	1.11954e-20	2.00932e-21
1575	2.00608e-21	9.32857e-22	1.18603e-20	5.34755e-21	1.25987e-20	3.42869e-21
1576	4.54393e-21	2.99784e-21	2.25597e-20	1.08477e-20	1.64289e-20	7.92288e-21
1577	5.33563e-21	3.37649e-21	1.52218e-20	6.58095e-21	1.16611e-20	5.84551e-21
1578	2.41145e-21	1.39445e-21	1.019e-20	4.34186e-21	1.12558e-20	3.03537e-21
1579	8.80444e-22	3.302e-22	7.55829e-21	3.10787e-21	1.06766e-20	1.81921e-21
1580	4.007e-22	8.68146e-23	6.97911e-21	2.82713e-21	1.05281e-20	1.59476e-21
1581	6.31705e-23	7.71144e-23	6.77084e-21	2.72719e-21	1.03073e-20	1.506e-21
1582	6.53347e-24	6.39521e-23	6.83106e-21	2.75113e-21	1.02038e-20	1.50948e-21
1583	4.95261e-23	6.57791e-23	6.82243e-21	2.73571e-21	1.01089e-20	1.51734e-21
1584	1.87347e-22	8.10312e-23	6.67702e-21	2.66166e-21	9.93567e-21	1.45545e-21
1585	3.26125e-22	1.16491e-22	6.60412e-21	2.63593e-21	9.81323e-21	1.44008e-21
1586	3.78218e-22	1.16567e-22	6.63288e-21	2.6432e-21	9.77394e-21	1.4634e-21
1587	4.49415e-22	1.08345e-22	6.68458e-21	2.65076e-21	9.66083e-21	1.45327e-21
1588	5.02249e-22	1.10631e-22	6.70699e-21	2.65234e-21	9.51251e-21	1.45764e-21
1589	4.6208e-22	7.00926e-23	7.03143e-21	2.80784e-21	9.49601e-21	1.55074e-21
1590	1.71393e-22	2.41579e-22	7.58e-21	3.07423e-21	9.56181e-21	1.76051e-21
1591	3.43777e-22	1.34736e-22	7.16992e-21	2.87713e-21	9.36177e-21	1.62641e-21
1592	3.33306e-22	1.68464e-22	7.35332e-21	2.96743e-21	9.31379e-21	1.69721e-21
1593	5.73511e-22	5.9029e-23	6.92898e-21	2.74356e-21	9.08825e-21	1.53225e-21
1594	4.22885e-22	1.48405e-22	7.86582e-21	3.21294e-21	9.39416e-21	1.80512e-21
1595	1.32011e-23	4.4843e-22	8.12698e-21	3.26348e-21	9.14265e-21	1.95405e-21
1596	1.83906e-22	3.15202e-22	7.89942e-21	3.19179e-21	9.21665e-21	1.86777e-21
1597	4.31349e-22	1.26531e-22	7.09582e-21	2.81203e-21	8.81871e-21	1.60366e-21
1598	6.4007e-22	1.04413e-22	6.71021e-21	2.66349e-21	8.71146e-21	1.45931e-21
1599	6.10985e-22	1.08287e-22	6.64437e-21	2.65922e-21	8.69753e-21	1.47442e-21
1600	5.53764e-22	9.19672e-23	6.75788e-21	2.7295e-21	8.68564e-21	1.51642e-21
1601	1.52277e-22	2.10929e-22	7.66321e-21	3.18265e-21	9.00928e-21	1.83644e-21
1602	3.0754e-23	2.45805e-22	7.45372e-21	3.07647e-21	8.89987e-21	1.80972e-21
1603	3.57579e-22	5.16021e-22	8.55774e-21	3.63587e-21	9.32802e-21	2.17796e-21
1604	3.37483e-22	4.03234e-22	7.74219e-21	3.18322e-21	8.82876e-21	1.89047e-21
1605	1.66003e-22	6.69526e-23	6.72073e-21	2.72103e-21	8.59942e-21	1.50599e-21
1606	1.07417e-22	6.37652e-23	6.93837e-21	2.84818e-21	8.68312e-21	1.58592e-21
1607	5.64965e-22	5.20006e-22	8.76995e-21	3.76079e-21	9.31663e-21	2.25187e-21
1608	2.77352e-22	2.74868e-22	7.56565e-21	3.15322e-21	8.69733e-21	1.85643e-21
1609	7.93129e-22	7.12774e-22	9.83245e-21	4.32126e-21	9.49294e-21	2.68953e-21
1610	7.8089e-22	6.45242e-22	8.32702e-21	3.5071e-21	8.66434e-21	2.20546e-21
1611	2.13038e-23	8.03107e-23	6.74959e-21	2.82812e-21	8.43603e-21	1.5972e-21
1612	8.95552e-23	9.28149e-23	6.75069e-21	2.86462e-21	8.48944e-21	1.62108e-21
1613	1.02996e-22	9.2175e-23	6.76384e-21	2.90854e-21	8.46758e-21	1.64122e-21
1614	1.26026e-22	1.27833e-22	6.99405e-21	3.07391e-21	8.51e-21	1.73596e-21
1615	4.20219e-22	3.94896e-22	8.37205e-21	3.82831e-21	9.03692e-21	2.27175e-21
1616	1.6508e-21	1.49187e-21	1.51882e-20	7.43889e-21	1.18408e-20	4.92635e-21
1617	5.10485e-21	3.83466e-21	2.01997e-20	9.56777e-21	1.15937e-20	7.92738e-21
1618	2.12595e-21	1.58947e-21	9.84278e-21	4.42933e-21	8.52767e-21	3.40998e-21
1619	4.76833e-22	4.49123e-22	7.30939e-21	3.40614e-21	8.69316e-21	2.08543e-21
1620	1.74496e-22	2.63857e-22	6.70961e-21	3.1661e-21	8.68475e-21	1.84755e-21
1621	1.99761e-22	3.53926e-22	6.88852e-21	3.30059e-21	8.78429e-21	1.93114e-21
1622	7.43696e-22	9.00148e-22	9.69314e-21	4.83499e-21	9.89864e-21	3.03669e-21
1623	2.76088e-21	2.55031e-21	1.66456e-20	8.40307e-21	1.21608e-20	5.99819e-21
1624	2.3424e-21	2.02137e-21	1.06163e-20	5.06347e-21	8.7827e-21	3.97557e-21
1625	2.06948e-22	5.15846e-22	6.70541e-21	3.34646e-21	8.54327e-21	2.05521e-21
1626	2.22797e-22	2.40594e-22	6.20381e-21	3.19109e-21	8.5352e-21	1.82239e-21
1627	6.46872e-23	5.29578e-22	8.71383e-21	4.5481e-21	9.64773e-21	2.73122e-21
1628	1.71731e-21	1.7361e-21	1.19448e-20	6.01143e-21	9.8244e-21	4.31631e-21
1629	3.92143e-22	6.43351e-22	6.69558e-21	3.39057e-21	8.12864e-21	2.14424e-21
1630	3.48485e-22	1.30808e-22	5.68314e-21	2.98405e-21	8.11539e-21	1.6746e-21
1631	3.99189e-22	8.34768e-23	5.52469e-21	2.91884e-21	8.0567e-21	1.64579e-21
1632	2.74377e-22	1.21035e-22	5.65767e-21	3.00364e-21	7.9733e-21	1.68231e-21
1633	1.39898e-22	1.93014e-22	6.02016e-21	3.20989e-21	7.99118e-21	1.8318e-21
1634	3.28896e-22	5.55153e-22	8.16222e-21	4.34229e-21	8.7703e-21	2.659e-21
1635	5.19314e-21	4.3575e-21	2.69598e-20	1.393e-20	1.50509e-20	1.05162e-20
1636	5.00038e-21	3.75933e-21	1.45515e-20	7.00281e-21	8.2369e-21	6.27009e-21
1637	2.92585e-21	2.44117e-21	1.42398e-20	7.2478e-21	9.89893e-21	5.34286e-21
1638	2.46e-21	1.90271e-21	1.02848e-20	5.1004e-21	7.94675e-21	3.79015e-21
1639	6.48587e-22	5.23311e-22	6.66198e-21	3.43181e-21	7.33701e-21	2.05177e-21
1640	6.15926e-22	5.17241e-22	7.11068e-21	3.67634e-21	7.58622e-21	2.18134e-21
1641	5.57731e-22	4.42659e-22	6.51786e-21	3.33699e-21	7.16595e-21	1.99162e-21
1642	4.4542e-22	3.9173e-22	6.79131e-21	3.49089e-21	7.32081e-21	2.06545e-21
1643	5.94943e-22	4.96779e-22	6.80097e-21	3.44851e-21	7.03331e-21	2.0387e-21
1644	3.70378e-22	3.318e-22	6.75825e-21	3.45662e-21	7.01088e-21	1.9925e-21
1645	1.05786e-21	9.394e-22	1.01691e-20	5.26629e-21	8.3898e-21	3.29211e-21
1646	3.74079e-21	3.08524e-21	1.92432e-20	9.89541e-21	1.13198e-20	7.25965e-21
1647	5.32447e-21	4.11472e-21	1.83211e-20	9.10183e-21	9.70456e-21	7.42443e-21
1648	5.45415e-21	4.35985e-21	2.05258e-20	1.02566e-20	1.07109e-20	8.21536e-21
1649	1.77104e-21	1.4496e-21	9.17957e-21	4.44225e-21	6.71027e-21	3.17223e-21
1650	7.92201e-22	7.77195e-22	8.21336e-21	4.08461e-21	6.85792e-21	2.55716e-21
1651	1.26386e-21	1.23463e-21	1.14935e-20	5.81996e-21	8.17481e-21	3.83416e-21
1652	3.38682e-21	3.10846e-21	2.35676e-20	1.2203e-20	1.31429e-20	8.63613e-21
1653	1.39944e-20	1.08034e-20	4.30072e-20	2.1392e-20	1.74393e-20	1.96576e-20
1654	9.80949e-21	7.78584e-21	2.833e-20	1.37778e-20	1.18793e-20	1.27162e-20
1655	4.16029e-21	3.46692e-21	1.39891e-20	6.49135e-21	7.22675e-21	5.56238e-21
1656	9.89617e-22	1.1581e-21	8.91451e-21	4.13958e-21	6.47182e-21	2.76609e-21
1657	3.17509e-22	7.25443e-22	8.11776e-21	3.74034e-21	6.33161e-21	2.26853e-21
1658	1.58676e-22	4.08973e-22	7.28694e-21	3.28644e-21	5.96261e-21	1.90375e-21
1659	4.97349e-22	1.87026e-22	6.95562e-21	3.09568e-21	5.85762e-21	1.7539e-21
1660	5.67321e-22	1.79486e-22	7.06025e-21	3.1147e-21	5.85e-21	1.74343e-21
1661	2.95185e-22	4.40312e-22	8.16168e-21	3.64583e-21	6.29892e-21	2.11399e-21
1662	9.56786e-22	1.54353e-21	1.39281e-20	6.65156e-21	8.51477e-21	4.39511e-21
1663	2.17468e-21	2.30243e-21	1.32532e-20	5.97816e-21	6.79324e-21	4.65742e-21
1664	4.45501e-23	6.83907e-22	8.06935e-21	3.46472e-21	5.78664e-21	2.15915e-21
1665	6.25498e-22	2.20865e-22	7.21427e-21	3.14029e-21	5.86541e-21	1.76725e-21
1666	7.16389e-22	1.70652e-22	7.02854e-21	3.10206e-21	5.89014e-21	1.7411e-21
1667	5.88368e-22	2.90677e-22	7.62762e-21	3.46083e-21	6.18756e-21	1.96458e-21
1668	6.95156e-22	1.4231e-21	1.23706e-20	5.97546e-21	8.19891e-21	3.85438e-21
1669	3.42909e-21	3.62379e-21	2.04318e-20	1.01223e-20	1.08533e-20	7.50085e-21
1670	2.56634e-21	2.64137e-21	1.24496e-20	5.79441e-21	6.53417e-21	4.75555e-21
1671	9.65945e-22	1.65943e-21	1.25433e-20	6.2001e-21	8.08835e-21	4.17875e-21
1672	1.75099e-21	2.21254e-21	1.19891e-20	5.82027e-21	7.09443e-21	4.31576e-21
1673	2.76914e-23	8.89251e-22	7.64087e-21	3.77782e-21	6.15826e-21	2.38092e-21
1674	4.25737e-22	6.39879e-22	8.00186e-21	4.14435e-21	6.76272e-21	2.48339e-21
1675	6.81605e-22	1.76162e-21	1.51743e-20	8.09833e-21	9.96868e-21	5.26295e-21
1676	1.30597e-21	1.95408e-21	8.31377e-21	4.20752e-21	5.63692e-21	3.30862e-21
1677	6.73595e-22	5.83971e-22	6.36855e-21	3.46108e-21	6.04002e-21	2.07671e-21
1678	1.08319e-21	3.52101e-22	5.88722e-21	3.27176e-21	5.94818e-21	1.89355e-21
1679	7.51408e-22	7.24864e-22	7.54484e-21	4.21065e-21	6.79755e-21	2.53991e-21
1680	1.61412e-21	2.69915e-21	1.25953e-20	6.76881e-21	8.51429e-21	4.73796e-21
1681	9.54173e-22	2.11543e-21	8.91162e-21	4.82739e-21	6.59068e-21	3.38e-21
1682	4.61427e-22	1.11552e-21	8.34221e-21	4.72424e-21	6.84978e-21	3.0065e-21
1683	1.32578e-21	2.74078e-21	1.69572e-20	9.33109e-21	1.02343e-20	6.54568e-21
1684	8.00472e-21	8.07919e-21	3.20199e-20	1.69858e-20	1.49158e-20	1.41216e-20
1685	7.97878e-21	7.6757e-21	2.54971e-20	1.3241e-20	1.0594e-20	1.21974e-20
1686	1.32082e-21	2.53971e-21	9.74692e-21	5.23268e-21	5.62661e-21	4.44308e-21
1687	8.87403e-22	9.81134e-22	6.90647e-21	4.02931e-21	5.79574e-21	2.64491e-21
1688	4.79679e-22	1.45549e-21	8.93622e-21	5.15497e-21	6.97747e-21	3.33837e-21
1689	4.9277e-22	1.46339e-21	8.01854e-21	4.61326e-21	6.17736e-21	3.13443e-21
1690	3.83311e-22	1.60709e-21	9.1975e-21	5.22849e-21	6.42918e-21	3.60957e-21
1691	1.47728e-21	7.07128e-22	5.4667e-21	3.34476e-21	5.08802e-21	2.13439e-21
1692	2.06067e-21	3.05495e-22	4.90056e-21	3.14561e-21	5.13366e-21	1.86128e-21
1693	2.01541e-21	3.72045e-22	5.1168e-21	3.27005e-21	5.25144e-21	1.96159e-21
1694	1.64398e-21	7.26236e-22	6.69744e-21	4.11219e-21	5.83018e-21	2.59611e-21
1695	4.22902e-22	1.89812e-21	1.41778e-20	8.1152e-21	9.06738e-21	5.38396e-21
1696	3.91178e-21	5.10593e-21	2.05307e-20	1.09305e-20	9.41412e-21	9.34517e-21
1697	1.82926e-21	3.37584e-21	1.23178e-20	6.73134e-21	6.64068e-21	5.71531e-21
1698	3.20012e-22	2.2937e-21	1.02372e-20	5.80457e-21	6.40799e-21	4.40356e-21
1699	9.80604e-23	2.07736e-21	1.22509e-20	7.03833e-21	7.92099e-21	4.98996e-21
1700	2.72401e-21	4.52801e-21	2.72461e-20	1.50086e-20	1.42371e-20	1.08787e-20
1701	7.07418e-21	6.9974e-21	2.06606e-20	1.04194e-20	6.6307e-21	1.03008e-20
1702	5.46513e-22	2.29669e-21	8.32774e-21	4.66218e-21	4.63076e-21	3.88342e-21
1703	1.16817e-21	1.14484e-21	6.91341e-21	4.27207e-21	5.53911e-21	2.78912e-21
1704	3.46367e-22	1.86666e-21	1.11674e-20	6.50973e-21	7.16273e-21	4.4843e-21
1705	1.31609e-22	2.07506e-21	9.23487e-21	5.3177e-21	5.53426e-21	4.01169e-21
1706	7.629e-23	2.13605e-21	1.27247e-20	7.25586e-21	7.27372e-21	5.15847e-21
1707	4.55476e-22	2.22918e-21	9.16606e-21	5.16851e-21	5.05848e-21	4.0651e-21
1708	1.62759e-21	6.58965e-22	5.04855e-21	3.25089e-21	4.38383e-21	2.0632e-21
1709	2.18389e-21	2.65644e-22	4.60724e-21	3.1017e-21	4.49447e-21	1.81502e-21
1710	1.24879e-21	1.02373e-21	7.35854e-21	4.47057e-21	5.50435e-21	2.8914e-21
1711	1.36402e-21	8.3381e-22	5.51046e-21	3.4243e-21	4.43444e-21	2.24795e-21
1712	2.10962e-21	2.66315e-22	4.40963e-21	2.96328e-21	4.39584e-21	1.75678e-21
1713	1.58822e-21	6.74413e-22	5.78251e-21	3.68173e-21	4.97602e-21	2.27896e-21
1714	3.29036e-22	1.68873e-21	9.94732e-21	5.81632e-21	6.56987e-21	3.99268e-21
1715	1.55428e-21	3.1295e-21	1.4081e-20	7.8632e-21	7.76186e-21	5.9028e-21
1716	8.8213e-22	2.43744e-21	1.03454e-20	5.90835e-21	6.37157e-21	4.39729e-21
1717	2.01016e-21	3.505e-21	1.82204e-20	1.01591e-20	9.95037e-21	7.48578e-21
1718	5.09033e-21	5.65126e-21	2.05624e-20	1.09563e-20	9.21696e-21	9.43311e-21
1719	1.86633e-21	2.8222e-21	9.71286e-21	5.36128e-21	5.02574e-21	4.55341e-21
1720	9.22655e-22	6.61425e-22	4.62928e-21	3.06277e-21	4.47061e-21	2.06663e-21
1721	1.34325e-21	2.93411e-22	4.10238e-21	2.88273e-21	4.61656e-21	1.75675e-21
1722	1.20505e-21	3.07305e-22	3.97624e-21	2.8365e-21	4.5684e-21	1.7276e-21
1723	7.37804e-22	6.2898e-22	5.56945e-21	3.69796e-21	5.38642e-21	2.32677e-21
1724	9.3032e-23	9.73096e-22	5.26607e-21	3.44704e-21	4.89899e-21	2.32886e-21
1725	1.06324e-21	1.43664e-22	3.20831e-21	2.48244e-21	4.41315e-21	1.52811e-21
1726	1.19205e-21	6.93283e-23	3.09854e-21	2.46373e-21	4.46286e-21	1.50933e-21
1727	1.06994e-21	8.09413e-23	3.17645e-21	2.50777e-21	4.46838e-21	1.5267e-21
1728	1.06797e-21	7.92946e-23	3.0917e-21	2.46335e-21	4.47423e-21	1.49597e-21
1729	8.9585e-22	2.39241e-22	4.05973e-21	2.99718e-21	4.92047e-21	1.82968e-21
1730	2.35843e-21	2.798e-21	1.04435e-20	6.05319e-21	6.70265e-21	4.68391e-21
1731	2.07654e-22	1.02928e-21	5.00895e-21	3.34087e-21	4.94588e-21	2.39976e-21
1732	3.495e-22	1.18863e-21	7.03377e-21	4.48763e-21	6.11389e-21	3.1093e-21
1733	2.29187e-21	2.84282e-21	1.46427e-20	8.48274e-21	9.30757e-21	6.22957e-21
1734	6.89418e-21	6.38256e-21	2.32327e-20	1.26166e-20	1.16036e-20	1.06548e-20
1735	3.82932e-21	3.57867e-21	1.03929e-20	5.6651e-21	5.39975e-21	5.47898e-21
1736	3.05282e-22	1.02634e-21	4.93604e-21	3.19923e-21	4.80469e-21	2.46655e-21
1737	5.46268e-22	4.81579e-22	4.46378e-21	3.06865e-21	5.22663e-21	2.06416e-21
1738	2.73968e-22	7.48362e-22	4.98754e-21	3.29091e-21	5.40246e-21	2.27905e-21
1739	2.6257e-22	9.1151e-22	7.49018e-21	4.68064e-21	6.73946e-21	3.16922e-21
1740	1.88105e-21	2.65025e-21	1.29296e-20	7.29003e-21	7.85625e-21	5.8614e-21
1741	9.57445e-23	1.10411e-21	4.98642e-21	3.11001e-21	4.91683e-21	2.62704e-21
1742	1.42807e-21	2.61821e-22	3.82289e-21	2.72038e-21	5.42903e-21	1.83307e-21
1743	9.81205e-22	2.37456e-21	1.03494e-20	5.99323e-21	7.84001e-21	4.54677e-21
1744	3.97859e-22	1.9213e-21	6.88469e-21	4.1373e-21	6.35997e-21	3.26298e-21
1745	9.52084e-22	9.42251e-22	5.21923e-21	3.38291e-21	6.10126e-21	2.41843e-21
1746	8.25819e-22	1.11339e-21	6.34787e-21	3.96878e-21	6.54592e-21	2.90603e-21
1747	3.57124e-23	1.87363e-21	8.90244e-21	5.2596e-21	7.26589e-21	4.01667e-21
1748	5.2969e-22	2.30855e-21	1.03286e-20	5.99475e-21	7.61872e-21	4.63104e-21
1749	1.38767e-21	2.98799e-21	1.1338e-20	6.40305e-21	7.52059e-21	5.29603e-21
1750	1.79799e-22	1.75091e-21	7.0775e-21	4.3219e-21	6.40541e-21	3.3594e-21
1751	5.46735e-22	2.53237e-21	1.25482e-20	7.35545e-21	9.1463e-21	5.30918e-21
1752	9.03929e-22	2.51296e-21	6.69054e-21	3.95559e-21	5.43194e-21	3.54063e-21
1753	1.46303e-21	7.22182e-22	3.71172e-21	2.66845e-21	5.57769e-21	1.93218e-21
1754	2.27923e-21	1.10079e-22	2.57248e-21	2.14421e-21	6.17069e-21	1.45391e-21
1755	2.49934e-21	1.06595e-22	2.33038e-21	2.05986e-21	7.16107e-21	1.36904e-21
1756	2.20309e-21	2.1645e-22	3.9057e-21	2.91835e-21	7.01465e-21	1.90061e-21
1757	1.85434e-22	1.7119e-21	6.13618e-21	3.86252e-21	5.59813e-21	3.15869e-21
1758	1.59712e-21	6.06011e-22	3.47168e-21	2.61074e-21	5.31572e-21	1.88248e-21
1759	1.91233e-21	3.36562e-22	2.81514e-21	2.29871e-21	5.39155e-21	1.63172e-21
1760	2.26762e-21	8.31768e-23	2.6134e-21	2.25117e-21	5.63507e-21	1.52905e-21
1761	1.322e-21	8.64314e-22	6.77416e-21	4.47198e-21	7.7482e-21	3.08291e-21
1762	8.08371e-22	2.38345e-21	9.00105e-21	5.3539e-21	7.65709e-21	4.52108e-21
1763	1.28995e-21	6.38142e-22	2.97497e-21	2.32336e-21	5.80353e-21	1.86057e-21
1764	2.1948e-21	8.51056e-23	2.05766e-21	1.97068e-21	5.95811e-21	1.3811e-21
1765	2.26125e-21	1.43251e-22	1.85045e-21	1.88189e-21	5.98333e-21	1.32213e-21
1766	2.22668e-21	1.50031e-22	1.81161e-21	1.87606e-21	5.91547e-21	1.30104e-21
1767	1.99588e-21	1.01275e-22	2.64912e-21	2.34657e-21	6.23453e-21	1.61699e-21
1768	5.43328e-22	1.32037e-21	7.44115e-21	4.85442e-21	8.23643e-21	3.42231e-21
1769	1.37646e-22	1.42605e-21	4.03161e-21	2.83995e-21	5.5781e-21	2.47419e-21
1770	1.59786e-21	3.99757e-22	4.34198e-21	3.23536e-21	6.34449e-21	2.32673e-21
1771	3.54108e-22	1.9534e-21	1.07437e-20	6.4702e-21	8.19669e-21	5.17454e-21
1772	1.6708e-21	2.9659e-21	1.38195e-20	7.98813e-21	8.83025e-21	6.68962e-21
1773	1.51201e-21	2.61349e-21	8.66613e-21	5.04304e-21	5.70336e-21	4.89384e-21
1774	1.14926e-21	6.17664e-22	3.16472e-21	2.46963e-21	4.96577e-21	2.11055e-21
1775	1.36887e-21	5.3761e-22	4.49403e-21	3.29191e-21	6.01933e-21	2.41339e-21
1776	5.64031e-22	1.06526e-21	4.46238e-21	3.13285e-21	5.42479e-21	2.55114e-21
1777	1.92334e-21	7.10905e-23	1.66921e-21	1.78557e-21	4.6439e-21	1.35967e-21
1778	2.1048e-21	1.26004e-22	1.74987e-21	1.84558e-21	4.78636e-21	1.36765e-21
1779	1.54013e-21	3.66743e-22	2.86909e-21	2.37166e-21	5.11422e-21	1.79518e-21
1780	1.29123e-21	5.43619e-22	4.36922e-21	3.14002e-21	5.62995e-21	2.31615e-21
1781	1.46519e-22	1.38002e-21	6.36936e-21	3.99268e-21	5.71358e-21	3.27217e-21
1782	1.30483e-21	4.29806e-22	2.48875e-21	2.04949e-21	4.40613e-21	1.65297e-21
1783	1.98143e-21	1.10852e-22	1.7028e-21	1.71094e-21	4.28245e-21	1.27675e-21
1784	1.71686e-21	2.22515e-22	3.46868e-21	2.64271e-21	5.06547e-21	1.87141e-21
1785	6.82538e-22	9.80994e-22	4.04456e-21	2.79766e-21	4.84767e-21	2.27601e-21
1786	1.82641e-21	7.84977e-23	1.61036e-21	1.554e-21	3.87988e-21	1.28367e-21
1787	2.21635e-21	2.72233e-22	1.49092e-21	1.52802e-21	3.89655e-21	1.18939e-21
1788	2.08364e-21	2.00182e-22	1.7385e-21	1.63351e-21	3.93311e-21	1.26312e-21
1789	1.92153e-21	1.21864e-22	1.93879e-21	1.7188e-21	3.90634e-21	1.3276e-21
1790	1.45563e-21	3.07569e-22	3.71556e-21	2.66117e-21	4.67947e-21	1.95772e-21
1791	2.5361e-22	1.62982e-21	7.44155e-21	4.48664e-21	5.71093e-21	3.60587e-21
1792	4.22774e-22	1.69813e-21	8.86724e-21	5.22316e-21	6.16396e-21	4.19298e-21
1793	1.74017e-21	2.53375e-21	9.82837e-21	5.46139e-21	5.25738e-21	4.97136e-21
1794	5.35616e-22	6.73424e-22	3.17735e-21	2.11795e-21	3.3052e-21	1.98608e-21
1795	1.2278e-21	2.00276e-22	3.13503e-21	2.2192e-21	3.81475e-21	1.74683e-21
1796	4.63177e-24	1.14249e-21	5.67634e-21	3.46315e-21	4.71308e-21	2.83467e-21
1797	8.56521e-22	3.03913e-22	2.52168e-21	1.83838e-21	3.29523e-21	1.5389e-21
1798	1.30592e-21	1.33368e-22	2.28914e-21	1.77708e-21	3.24151e-21	1.41756e-21
1799	4.4892e-22	5.85034e-22	6.11646e-21	3.74824e-21	4.61103e-21	2.87163e-21
1800	4.29628e-22	1.08172e-21	5.23469e-21	3.06445e-21	3.30805e-21	2.77715e-21
1801	2.18685e-22	6.43404e-22	4.20135e-21	2.68246e-21	3.65045e-21	2.13091e-21
1802	4.23153e-22	1.11995e-21	5.09281e-21	3.11663e-21	3.86451e-21	2.53805e-21
1803	1.54937e-23	6.53404e-22	3.18836e-21	2.06357e-21	2.69257e-21	1.83035e-21
1804	1.05643e-21	2.26589e-22	1.74277e-21	1.39778e-21	2.27794e-21	1.16177e-21
1805	9.94581e-22	2.13947e-22	2.07396e-21	1.54754e-21	2.41848e-21	1.29892e-21
1806	9.65956e-22	2.44556e-22	1.78237e-21	1.39575e-21	2.19241e-21	1.21406e-21
1807	8.82345e-22	1.87382e-22	2.23946e-21	1.65071e-21	2.35605e-21	1.35781e-21
1808	1.52702e-22	4.01628e-22	3.26706e-21	2.11514e-21	2.55889e-21	1.80055e-21
1809	6.3993e-22	8.34561e-23	2.05368e-21	1.4997e-21	2.00758e-21	1.32261e-21
1810	5.86525e-22	8.64849e-23	3.5093e-21	2.289e-21	2.66947e-21	1.81425e-21
1811	6.72965e-22	8.58588e-22	4.43558e-21	2.58655e-21	2.18048e-21	2.39931e-21
1812	1.26802e-22	4.58494e-22	3.38309e-21	2.1249e-21	2.20583e-21	1.83709e-21
1813	3.51565e-22	7.11358e-23	2.05544e-21	1.45889e-21	1.52202e-21	1.30207e-21
1814	7.60986e-22	3.57572e-22	1.59485e-21	1.24728e-21	1.41552e-21	1.10805e-21
1815	7.17159e-22	3.65665e-22	1.59746e-21	1.24202e-21	1.32184e-21	1.10469e-21
1816	6.41074e-22	3.55283e-22	1.64234e-21	1.25783e-21	1.25452e-21	1.1032e-21
1817	2.42036e-22	9.09488e-23	2.49214e-21	1.6985e-21	1.63576e-21	1.40232e-21
1818	5.68529e-23	1.26975e-22	2.25467e-21	1.50662e-21	1.30248e-21	1.36559e-21
1819	4.22675e-22	3.47202e-22	1.59518e-21	1.19516e-21	1.04874e-21	1.10808e-21
1820	4.12367e-22	3.85707e-22	1.58327e-21	1.18449e-21	9.85755e-22	1.10108e-21
1821	3.14056e-22	3.53155e-22	1.70457e-21	1.233e-21	1.00242e-21	1.1343e-21
1822	1.28418e-22	2.57699e-22	2.05528e-21	1.39901e-21	1.1206e-21	1.23097e-21
1823	3.04407e-22	9.796e-23	2.63619e-21	1.68061e-21	1.30259e-21	1.48609e-21
1824	3.67257e-22	1.18689e-22	3.88203e-21	2.37761e-21	1.95466e-21	1.91767e-21
1825	2.27173e-21	1.52987e-21	8.21356e-21	4.49115e-21	3.08639e-21	3.80001e-21
1826	1.41294e-21	6.34995e-22	2.99891e-21	1.71442e-21	8.82331e-22	1.83172e-21
1827	3.14248e-22	2.12421e-22	1.98572e-21	1.34357e-21	1.05682e-21	1.25697e-21
1828	4.3146e-22	1.30311e-22	2.99212e-21	1.90953e-21	1.56774e-21	1.62903e-21
1829	2.02064e-21	1.18501e-21	8.2749e-21	4.61188e-21	3.44105e-21	3.86795e-21
1830	3.79564e-21	2.43821e-21	1.05411e-20	5.65019e-21	3.45768e-21	5.15563e-21
1831	1.82178e-21	7.58007e-22	3.26513e-21	1.90088e-21	8.73208e-22	2.09297e-21
1832	5.41858e-22	2.04994e-22	1.72253e-21	1.29906e-21	1.01286e-21	1.24127e-21
1833	6.11761e-22	1.42916e-22	1.90736e-21	1.43635e-21	1.17776e-21	1.29575e-21
1834	6.62914e-22	1.26807e-22	1.63087e-21	1.29315e-21	9.87641e-22	1.21683e-21
1835	4.08476e-22	3.33137e-22	1.32957e-21	1.18769e-21	9.05288e-22	1.13316e-21
1836	4.40362e-22	3.21001e-22	1.38428e-21	1.25512e-21	9.33742e-22	1.20629e-21
1837	9.94715e-22	1.7414e-22	2.93668e-21	2.07024e-21	1.52477e-21	1.84661e-21
1838	7.8754e-22	1.04477e-22	1.38447e-21	1.28985e-21	6.61652e-22	1.26815e-21
1839	4.42304e-22	3.3709e-22	9.28983e-22	1.13802e-21	5.73796e-22	1.07908e-21
1840	3.90136e-22	3.51631e-22	8.51351e-22	1.1264e-21	5.08563e-22	1.08175e-21
1841	4.51609e-22	2.79156e-22	1.10139e-21	1.28445e-21	5.66063e-22	1.20369e-21
1842	1.03517e-21	2.81148e-22	2.18553e-21	1.86409e-21	9.60222e-22	1.70818e-21
1843	1.22455e-21	5.12409e-22	3.64657e-21	2.67663e-21	1.53292e-21	2.29336e-21
1844	2.73177e-21	1.84098e-21	1.00326e-20	6.01408e-21	3.88554e-21	4.97375e-21
1845	2.92813e-21	1.75987e-21	4.23105e-21	2.70549e-21	3.62109e-22	3.20464e-21
1846	1.17379e-21	5.2026e-22	1.98781e-21	1.77077e-21	4.47823e-22	1.79932e-21
1847	4.96083e-22	1.05559e-22	1.77045e-21	1.76272e-21	6.24842e-22	1.62339e-21
1848	1.37144e-21	8.46316e-22	3.44024e-21	2.57228e-21	1.07515e-21	2.3815e-21
1849	5.30168e-22	2.12726e-22	1.0881e-21	1.38961e-21	1.26771e-22	1.43547e-21
1850	2.20056e-22	3.19174e-22	2.77163e-22	1.05692e-21	9.14679e-23	1.09395e-21
1851	4.00385e-22	4.09501e-22	1.38403e-22	1.00972e-21	1.27016e-22	1.0325e-21
1852	3.09832e-22	3.88639e-22	1.8821e-22	1.05109e-21	1.0113e-22	1.06603e-21
1853	2.81931e-22	3.96065e-22	1.0352e-22	1.01145e-21	7.81679e-23	1.05335e-21
1854	3.99411e-22	4.17671e-22	6.10148e-23	9.94273e-22	6.53022e-23	1.0273e-21
1855	5.8411e-22	4.20249e-22	3.10447e-23	9.89785e-22	2.97771e-23	1.03231e-21
1856	7.81975e-22	4.19546e-22	5.98582e-23	1.00426e-21	2.02284e-23	1.02662e-21
1857	9.32513e-22	4.13382e-22	5.24127e-23	9.92424e-22	1.47778e-24	1.01852e-21
1858	9.0845e-22	2.58299e-22	4.68821e-22	1.21177e-21	2.15351e-22	1.1783e-21
1859	8.69349e-22	1.14844e-22	5.75624e-22	1.23194e-21	2.52482e-22	1.23771e-21
1860	1.2619e-21	3.05919e-22	1.96959e-22	1.05589e-21	1.88072e-22	1.09317e-21
1861	1.32816e-21	2.27777e-22	4.12781e-22	1.1695e-21	3.26109e-22	1.1584e-21
1862	1.38365e-21	1.45491e-22	4.0041e-22	1.14256e-21	3.1375e-22	1.15734e-21
1863	1.86527e-21	3.82699e-22	4.79095e-23	9.69937e-22	2.43665e-22	1.03381e-21
1864	2.00682e-21	3.61385e-22	1.33944e-22	1.00746e-21	3.06242e-22	1.05002e-21
1865	2.16033e-21	3.23558e-22	4.41693e-22	1.17153e-21	4.89279e-22	1.15824e-21
1866	1.54662e-21	3.03443e-22	2.49785e-21	2.19149e-21	1.23418e-21	2.03702e-21
1867	1.25364e-21	6.27545e-22	3.62435e-21	2.74551e-21	1.63709e-21	2.51053e-21
1868	3.51285e-22	1.43584e-21	5.87516e-21	3.85618e-21	2.33193e-21	3.64276e-21
1869	1.58314e-22	1.73188e-21	7.08776e-21	4.53933e-21	2.93987e-21	4.0964e-21
1870	9.42903e-22	1.07272e-21	2.69694e-21	2.13405e-21	7.95212e-22	2.42373e-21
1871	2.12961e-21	2.56294e-22	1.10172e-21	1.44845e-21	8.30405e-22	1.49854e-21
1872	2.87166e-21	2.93658e-22	1.29949e-22	9.94328e-22	4.69028e-22	1.05927e-21
1873	3.14552e-21	4.25688e-22	7.29364e-23	9.03301e-22	4.4638e-22	9.99556e-22
1874	3.27515e-21	4.51631e-22	1.06469e-22	8.89455e-22	4.70065e-22	9.91082e-22
1875	3.35381e-21	4.51558e-22	1.21548e-22	8.75503e-22	3.86709e-22	9.71899e-22
1876	3.40672e-21	4.53225e-22	1.24009e-22	8.71365e-22	3.1593e-22	9.62139e-22
1877	3.44647e-21	4.32701e-22	9.6038e-23	8.93182e-22	2.92411e-22	9.63694e-22
1878	3.53368e-21	4.37092e-22	7.47006e-23	8.83463e-22	2.91438e-22	9.43074e-22
1879	3.43635e-21	3.02366e-22	1.38168e-22	9.85292e-22	3.49112e-22	1.0274e-21
1880	3.52497e-21	3.65687e-22	4.05625e-23	8.83934e-22	2.41435e-22	1.00026e-21
1881	3.67926e-21	4.65905e-22	1.41512e-22	8.32365e-22	1.44205e-22	9.37933e-22
1882	3.7208e-21	4.66955e-22	1.28389e-22	8.28396e-22	6.6847e-23	9.16741e-22
1883	3.72941e-21	4.60852e-22	6.98045e-23	8.57339e-22	3.09547e-24	9.44916e-22
1884	3.57733e-21	3.34824e-22	4.40467e-22	1.10938e-21	1.68094e-22	1.14234e-21
1885	3.36519e-21	1.76306e-22	6.13549e-22	1.15393e-21	9.84079e-23	1.21929e-21
1886	3.63348e-21	3.65855e-22	3.44733e-23	8.80353e-22	8.90224e-23	1.00712e-21
1887	3.74058e-21	4.4625e-22	6.73771e-23	8.38906e-22	1.6947e-22	9.6568e-22
1888	3.70347e-21	4.09179e-22	1.13099e-22	9.32499e-22	1.91511e-22	1.00591e-21
1889	3.19318e-21	1.21623e-22	2.54825e-21	2.23389e-21	9.07695e-22	1.92294e-21
1890	1.8007e-21	1.09321e-21	3.88123e-21	2.79012e-21	6.36466e-22	2.79127e-21
1891	3.19937e-21	9.86744e-23	2.73425e-22	9.88842e-22	5.07354e-22	1.2229e-21
1892	3.67048e-21	4.23749e-22	1.55625e-22	8.43238e-22	5.00274e-22	9.75789e-22
1893	3.61939e-21	4.04225e-22	1.62015e-22	8.47334e-22	5.78296e-22	1.00108e-21
1894	3.46485e-21	2.76397e-22	3.89519e-22	1.16452e-21	3.51423e-22	1.20415e-21
1895	2.63803e-21	3.90404e-22	2.14777e-21	2.04998e-21	1.39914e-22	1.97623e-21
1896	3.04537e-21	8.70517e-23	2.32847e-22	1.05826e-21	8.39126e-22	1.22096e-21
1897	3.54508e-21	4.18127e-22	4.04405e-22	8.18718e-22	9.56261e-22	9.33142e-22
1898	3.52456e-21	4.20426e-22	4.99844e-22	7.92168e-22	9.67716e-22	9.53919e-22
1899	3.56501e-21	4.65114e-22	6.04565e-22	7.61126e-22	1.01224e-21	9.28338e-22
1900	3.53871e-21	4.76929e-22	6.70645e-22	7.53278e-22	1.1012e-21	9.10796e-22
1901	3.48669e-21	4.46375e-22	6.53782e-22	7.82551e-22	1.12148e-21	9.3215e-22
1902	3.36903e-21	3.67741e-22	5.94076e-22	8.28237e-22	1.16228e-21	9.88171e-22
1903	3.42301e-21	4.28309e-22	7.34559e-22	7.73237e-22	1.28006e-21	9.36802e-22
1904	3.39623e-21	4.18172e-22	5.73148e-22	8.69043e-22	1.26511e-21	9.80925e-22
1905	3.33542e-21	3.67612e-22	5.60245e-22	8.74461e-22	1.34896e-21	9.96172e-22
1906	3.4826e-21	4.60485e-22	8.52937e-22	7.67641e-22	1.4187e-21	9.25119e-22
1907	3.28453e-21	3.02426e-22	2.20728e-22	1.0944e-21	1.11173e-21	1.15316e-21
1908	2.74646e-21	1.58745e-22	4.71851e-22	1.41572e-21	1.06786e-21	1.49333e-21
1909	3.05327e-21	1.30363e-22	1.99916e-22	1.32304e-21	1.03376e-21	1.36205e-21
1910	2.43219e-21	4.29835e-22	1.4301e-21	1.91146e-21	7.62232e-22	1.92297e-21
1911	3.1279e-21	1.81182e-22	5.3882e-22	9.11364e-22	1.49539e-21	1.12459e-21
1912	3.54449e-21	4.5892e-22	9.66545e-22	7.46605e-22	1.49847e-21	9.51226e-22
1913	3.58985e-21	4.70963e-22	1.00143e-21	7.3847e-22	1.52833e-21	9.38742e-22
1914	3.60932e-21	4.62905e-22	9.75969e-22	7.48543e-22	1.48292e-21	9.42894e-22
1915	3.59954e-21	4.22102e-22	9.4207e-22	7.66406e-22	1.56391e-21	9.4032e-22
1916	3.62782e-21	4.26611e-22	9.16595e-22	7.77812e-22	1.54251e-21	9.60198e-22
1917	3.55599e-21	3.09537e-22	7.3032e-23	1.22347e-21	1.07507e-21	1.27212e-21
1918	2.52427e-21	6.4916e-22	3.53249e-21	3.10013e-21	2.22399e-22	2.75493e-21
1919	3.23468e-21	9.51436e-23	5.62615e-22	8.66845e-22	1.58317e-21	1.18019e-21
1920	3.76292e-21	4.03083e-22	8.71308e-22	7.77697e-22	1.42597e-21	9.71611e-22
1921	3.77419e-21	3.7517e-22	6.03469e-22	9.07702e-22	1.24936e-21	1.07685e-21
1922	3.03961e-21	3.30893e-22	1.6226e-21	2.02509e-21	3.27898e-22	1.94387e-21
1923	2.04153e-21	1.13231e-21	3.0049e-21	2.64665e-21	1.36183e-22	2.64147e-21
1924	3.25573e-21	1.32399e-22	1.34453e-22	1.03182e-21	1.28362e-21	1.30658e-21
1925	3.94775e-21	4.43323e-22	8.85797e-22	7.13598e-22	1.25762e-21	9.28975e-22
1926	4.01918e-21	4.77768e-22	9.15738e-22	6.95851e-22	1.22193e-21	9.0752e-22
1927	4.07196e-21	4.92854e-22	9.18135e-22	6.70135e-22	1.17535e-21	8.8084e-22
1928	4.08361e-21	4.91643e-22	8.96076e-22	6.70404e-22	1.05354e-21	9.05307e-22
1929	4.09291e-21	5.01327e-22	9.15585e-22	6.62434e-22	9.04938e-22	9.13048e-22
1930	4.09543e-21	5.0689e-22	8.97522e-22	6.61393e-22	8.66784e-22	8.87119e-22
1931	4.0755e-21	5.00424e-22	8.65355e-22	6.59167e-22	7.24523e-22	9.09975e-22
1932	4.07059e-21	5.01181e-22	8.07292e-22	6.73952e-22	6.25839e-22	8.98274e-22
1933	3.85958e-21	3.6234e-22	5.43209e-22	7.90769e-22	4.30527e-22	9.84531e-22
1934	3.92768e-21	4.62205e-22	7.65453e-22	6.69486e-22	4.2714e-22	9.03704e-22
1935	3.92203e-21	5.01834e-22	8.33662e-22	6.40542e-22	3.6368e-22	8.77588e-22
1936	3.86734e-21	5.05955e-22	8.25616e-22	6.38731e-22	3.15403e-22	8.76858e-22
1937	3.81743e-21	5.06809e-22	8.033e-22	6.44767e-22	3.66423e-22	8.73835e-22
1938	3.74619e-21	4.97767e-22	7.87504e-22	6.381e-22	4.63184e-22	8.71791e-22
1939	3.68181e-21	4.98025e-22	7.76318e-22	6.37787e-22	5.06019e-22	8.96678e-22
1940	3.60629e-21	4.90126e-22	7.44723e-22	6.54036e-22	5.08552e-22	9.06474e-22
1941	3.43459e-21	4.08482e-22	3.95563e-22	8.25121e-22	4.23555e-22	1.02492e-21
1942	2.66675e-21	2.86233e-22	2.27805e-21	2.23156e-21	7.39234e-22	2.07974e-21
1943	1.34947e-21	1.22967e-21	3.35429e-21	2.59346e-21	2.9604e-22	2.76671e-21
1944	2.81452e-21	1.47096e-22	2.70705e-22	7.93084e-22	8.87435e-22	1.12638e-21
1945	3.06569e-21	3.56363e-22	1.21043e-22	9.08519e-22	7.48156e-22	1.11891e-21
1946	2.69308e-21	1.75567e-22	3.03577e-22	1.0663e-21	7.89651e-22	1.32716e-21
1947	2.92205e-21	3.95657e-22	3.59097e-22	7.12466e-22	1.09979e-21	1.0096e-21
1948	3.0368e-21	5.26779e-22	5.71999e-22	6.03968e-22	1.1915e-21	8.84257e-22
1949	2.93095e-21	5.04916e-22	5.02462e-22	6.16681e-22	1.25072e-21	8.88269e-22
1950	2.8975e-21	5.17523e-22	4.7256e-22	5.96471e-22	1.25887e-21	8.87914e-22
1951	2.88795e-21	5.35023e-22	4.10726e-22	5.84967e-22	1.3049e-21	8.67934e-22
1952	2.86921e-21	5.48337e-22	3.59241e-22	5.76362e-22	1.36327e-21	8.56024e-22
1953	2.83106e-21	5.47542e-22	3.02162e-22	5.79051e-22	1.36097e-21	8.85833e-22
1954	2.74166e-21	5.05624e-22	9.84204e-23	6.33348e-22	1.25594e-21	9.43525e-22
1955	2.49422e-21	3.16099e-22	4.09577e-22	8.34898e-22	1.11146e-21	1.09006e-21
1956	2.56201e-21	3.96528e-22	1.60729e-22	6.55431e-22	1.23688e-21	9.55506e-22
1957	2.7262e-21	5.1592e-22	6.66811e-23	5.8517e-22	1.26655e-21	8.85615e-22
1958	2.75443e-21	5.14064e-22	1.11442e-22	5.75056e-22	1.25353e-21	8.87515e-22
1959	2.81328e-21	5.44704e-22	1.48319e-22	5.59722e-22	1.21817e-21	8.72831e-22
1960	2.83791e-21	5.21653e-22	2.91949e-22	5.90854e-22	1.08473e-21	8.8747e-22
1961	2.76746e-21	4.21702e-22	5.38406e-22	6.91518e-22	9.13332e-22	9.86949e-22
1962	2.87836e-21	4.87066e-22	3.4115e-22	5.76275e-22	9.38356e-22	8.73499e-22
1963	2.99417e-21	5.39818e-22	2.79138e-22	5.54098e-22	8.82958e-22	8.45159e-22
1964	3.02142e-21	5.2751e-22	2.86166e-22	5.5372e-22	7.04006e-22	8.51797e-22
1965	3.0465e-21	5.04013e-22	3.97009e-22	6.07314e-22	5.44016e-22	9.08647e-22
1966	2.73648e-21	2.20373e-22	1.26602e-21	1.03806e-21	7.48946e-23	1.26411e-21
1967	2.27316e-21	2.54036e-22	2.38483e-21	1.61037e-21	4.60823e-22	1.72992e-21
1968	2.2215e-21	2.61377e-22	1.54207e-21	1.15258e-21	6.43694e-23	1.45739e-21
1969	3.06292e-21	4.36969e-22	1.6278e-22	5.37529e-22	6.64418e-23	8.75243e-22
1970	3.20455e-21	5.27734e-22	5.9456e-23	5.14572e-22	1.00821e-22	8.65843e-22
1971	3.20603e-21	5.32111e-22	2.40728e-23	5.16679e-22	1.37696e-22	8.26232e-22
1972	3.21964e-21	5.382e-22	3.72259e-23	5.13863e-22	2.99211e-22	8.04313e-22
1973	3.24455e-21	5.35524e-22	1.36973e-22	5.14261e-22	5.61918e-22	8.19407e-22
1974	3.23099e-21	5.26668e-22	1.98819e-22	5.00755e-22	7.36672e-22	8.22985e-22
1975	3.22467e-21	5.22344e-22	2.40733e-22	4.92024e-22	9.38761e-22	8.38688e-22
1976	3.21277e-21	5.0943e-22	2.55198e-22	5.11069e-22	1.11846e-21	8.43056e-22
1977	3.21132e-21	5.1891e-22	3.33289e-22	4.9856e-22	1.28131e-21	8.27723e-22
1978	3.21217e-21	5.23119e-22	3.89429e-22	4.88234e-22	1.47206e-21	8.09563e-22
1979	3.18614e-21	5.21482e-22	4.06814e-22	4.951e-22	1.66616e-21	8.00653e-22
1980	3.18551e-21	5.32458e-22	4.02526e-22	5.03507e-22	1.87297e-21	8.00914e-22
1981	3.15682e-21	5.25036e-22	4.27987e-22	5.06242e-22	2.05217e-21	8.25403e-22
1982	3.12973e-21	5.18164e-22	4.73792e-22	4.87091e-22	2.20595e-21	8.15295e-22
1983	3.09995e-21	5.15615e-22	4.97655e-22	4.79385e-22	2.39919e-21	8.16904e-22
1984	3.07236e-21	5.13721e-22	5.28971e-22	4.84733e-22	2.56294e-21	8.27335e-22
1985	3.01221e-21	5.13358e-22	5.65252e-22	4.76602e-22	2.66544e-21	8.30704e-22
1986	2.95625e-21	5.1355e-22	5.91168e-22	4.80085e-22	2.81657e-21	8.30244e-22
1987	2.87378e-21	4.70134e-22	4.57383e-22	5.70812e-22	2.98785e-21	8.87986e-22
1988	2.38111e-21	1.23273e-22	4.04782e-22	1.01689e-21	3.30812e-21	1.22281e-21
1989	2.38433e-21	1.80093e-22	3.03222e-22	6.78367e-22	2.82517e-21	1.02392e-21
1990	2.71956e-21	4.6581e-22	7.33706e-22	5.05908e-22	2.60904e-21	8.43892e-22
1991	2.49835e-21	2.88476e-22	2.80295e-22	1.03626e-21	3.02765e-21	1.18602e-21
1992	1.36255e-21	6.27795e-22	2.00561e-21	1.87876e-21	3.3348e-21	2.00445e-21
1993	1.74891e-21	2.20841e-22	1.21922e-22	9.08292e-22	2.36812e-21	1.29456e-21
1994	2.4553e-21	3.97473e-22	8.32685e-22	5.08197e-22	2.00162e-21	8.658e-22
1995	2.53852e-21	4.92435e-22	9.99254e-22	4.63256e-22	1.77959e-21	8.21598e-22
1996	2.49337e-21	4.96111e-22	1.02456e-21	4.54948e-22	1.52092e-21	8.33263e-22
1997	2.42709e-21	4.88563e-22	1.0537e-21	4.50371e-22	1.279e-21	7.98736e-22
1998	2.38896e-21	4.88682e-22	1.00175e-21	4.723e-22	1.11263e-21	8.20121e-22
1999	2.25143e-21	4.32314e-22	8.1282e-22	5.42351e-22	1.05247e-21	8.7901e-22
2000	2.23284e-21	4.86358e-22	1.06454e-21	4.36302e-22	8.72371e-22	8.21062e-22
2001	2.18417e-21	4.91434e-22	1.05742e-21	4.3954e-22	8.41495e-22	8.03874e-22
2002	2.12888e-21	4.99322e-22	1.04996e-21	4.34301e-22	8.11864e-22	8.09268e-22
2003	2.05751e-21	4.95241e-22	1.03355e-21	4.33153e-22	7.7413e-22	8.07106e-22
2004	2.00981e-21	4.89015e-22	1.03357e-21	4.29555e-22	6.87171e-22	7.97548e-22
2005	1.99342e-21	4.91145e-22	1.01076e-21	4.25855e-22	6.06234e-22	7.89232e-22
2006	1.9385e-21	4.82325e-22	9.87171e-22	4.19253e-22	6.06458e-22	8.12274e-22
2007	1.90216e-21	4.5435e-22	9.08453e-22	4.56389e-22	5.33487e-22	8.27191e-22
2008	1.82178e-21	4.00662e-22	8.03448e-22	4.829e-22	5.24842e-22	8.58952e-22
2009	1.87636e-21	4.49418e-22	8.58931e-22	4.54649e-22	4.93168e-22	8.40687e-22
2010	1.90751e-21	4.57128e-22	8.77936e-22	4.35777e-22	4.17028e-22	8.4634e-22
2011	1.92358e-21	4.77181e-22	9.21494e-22	4.13923e-22	2.89339e-22	8.15165e-22
2012	1.92263e-21	4.85253e-22	9.15601e-22	4.077e-22	1.38669e-22	7.93983e-22
2013	1.92496e-21	4.83046e-22	8.83307e-22	4.1122e-22	1.15366e-23	7.9254e-22
2014	1.94382e-21	4.81775e-22	8.12059e-22	4.2018e-22	1.42998e-22	7.91696e-22
2015	1.94734e-21	4.76272e-22	7.65522e-22	4.32021e-22	1.9943e-22	8.45123e-22
2016	1.70471e-21	2.57516e-22	1.56391e-22	8.64609e-22	1.41567e-22	1.17076e-21
2017	1.17681e-21	2.03602e-22	6.49632e-22	1.03566e-21	4.40886e-23	1.3905e-21
2018	1.56723e-21	1.56622e-22	7.10225e-23	6.84977e-22	3.98167e-22	1.07084e-21
2019	1.64606e-21	2.11464e-22	1.73167e-22	6.014e-22	5.55739e-22	1.02055e-21
2020	1.89553e-21	4.15503e-22	5.45397e-22	4.25008e-22	8.21182e-22	8.48702e-22
2021	1.9762e-21	4.7365e-22	5.66336e-22	4.07503e-22	9.77422e-22	8.09261e-22
2022	1.95309e-21	4.6548e-22	4.72351e-22	4.14543e-22	1.08106e-21	8.20154e-22
2023	1.84165e-21	3.9674e-22	3.17705e-22	4.67186e-22	1.12258e-21	8.736e-22
2024	1.8475e-21	4.20456e-22	3.89872e-22	4.14024e-22	1.30475e-21	8.20315e-22
2025	1.87101e-21	4.72921e-22	3.90125e-22	4.03071e-22	1.40488e-21	7.89662e-22
2026	1.84446e-21	4.72245e-22	3.0243e-22	4.20563e-22	1.38575e-21	8.25546e-22
2027	1.71797e-21	4.35541e-22	1.95992e-22	4.22279e-22	1.51083e-21	8.13818e-22
2028	1.72914e-21	4.69796e-22	1.92157e-22	3.92093e-22	1.53901e-21	8.06661e-22
2029	1.65412e-21	4.74219e-22	1.59939e-22	3.83857e-22	1.4946e-21	8.28301e-22
2030	1.62046e-21	4.77398e-22	1.156e-22	3.87931e-22	1.47965e-21	8.09441e-22
2031	1.53521e-21	4.74313e-22	4.59563e-23	3.83685e-22	1.44378e-21	8.11308e-22
2032	1.46843e-21	4.77168e-22	3.47115e-23	3.88058e-22	1.43711e-21	7.98103e-22
2033	1.35018e-21	4.71334e-22	8.7771e-23	3.87002e-22	1.3779e-21	7.93275e-22
2034	1.24584e-21	4.6041e-22	1.66904e-22	3.86667e-22	1.27142e-21	8.18749e-22
2035	1.14583e-21	4.65641e-22	2.28536e-22	3.78502e-22	1.20399e-21	8.01853e-22
2036	1.04623e-21	4.61769e-22	2.84185e-22	3.88587e-22	1.12575e-21	8.00202e-22
2037	9.04075e-22	4.44707e-22	3.8468e-22	3.94011e-22	1.01342e-21	8.16295e-22
2038	7.71037e-22	4.33472e-22	4.57188e-22	4.00622e-22	9.37397e-22	8.30483e-22
2039	6.6096e-22	4.45655e-22	4.91267e-22	3.8559e-22	9.12301e-22	8.17419e-22
2040	5.57498e-22	4.45755e-22	5.96769e-22	4.01722e-22	8.35342e-22	7.92957e-22
2041	5.42103e-23	1.1219e-22	1.49794e-21	7.68858e-22	3.78061e-22	1.13246e-21
2042	6.45822e-23	2.23802e-22	9.68642e-22	4.76441e-22	6.37594e-22	9.13667e-22
2043	1.23926e-22	4.23511e-22	8.21e-22	4.11975e-22	6.17534e-22	8.30887e-22
2044	1.82354e-23	3.85749e-22	9.47864e-22	4.49316e-22	5.93252e-22	8.59603e-22
2045	5.75821e-23	4.31068e-22	8.19889e-22	3.97151e-22	6.63042e-22	7.9508e-22
2046	1.43019e-22	4.38748e-22	8.2236e-22	3.99098e-22	6.89095e-22	7.8785e-22
2047	2.1827e-22	4.23495e-22	8.13787e-22	3.85262e-22	7.13415e-22	7.7815e-22
2048	2.8686e-22	4.44516e-22	7.79357e-22	3.72709e-22	7.32723e-22	7.75399e-22
2049	3.71906e-22	4.42867e-22	7.77387e-22	3.77505e-22	7.20084e-22	7.90075e-22
2050	4.23136e-22	4.39139e-22	7.44031e-22	3.70295e-22	7.80877e-22	7.6822e-22
2051	4.60032e-22	4.37688e-22	7.25188e-22	3.64746e-22	8.48913e-22	7.81448e-22
2052	4.78939e-22	4.39323e-22	7.1845e-22	3.73981e-22	9.10394e-22	8.01737e-22
2053	4.89631e-22	4.37414e-22	6.90865e-22	3.71266e-22	9.87143e-22	7.84071e-22
2054	4.48424e-22	4.36115e-22	6.52359e-22	3.75726e-22	1.08834e-21	8.09352e-22
2055	3.44985e-22	4.36192e-22	6.23904e-22	3.75753e-22	1.17282e-21	7.96748e-22
2056	2.16375e-22	4.32447e-22	6.16732e-22	3.68517e-22	1.23941e-21	7.97013e-22
2057	1.26784e-22	4.36278e-22	6.2108e-22	3.66162e-22	1.29475e-21	7.99081e-22
2058	1.11127e-23	4.42062e-22	6.53205e-22	3.67278e-22	1.33203e-21	7.9454e-22
2059	1.41129e-22	4.39167e-22	7.01013e-22	3.70779e-22	1.38596e-21	8.13024e-22
2060	2.27843e-22	3.98941e-22	8.39301e-22	4.29851e-22	1.43288e-21	8.15621e-22
2061	3.69789e-22	3.74616e-22	8.47304e-22	4.16869e-22	1.48042e-21	8.126e-22
2062	5.89325e-22	4.25399e-22	8.0552e-22	3.79392e-22	1.51525e-21	7.8705e-22
2063	7.50947e-22	4.26543e-22	8.73966e-22	3.75395e-22	1.5546e-21	7.75892e-22
2064	8.44294e-22	3.76625e-22	1.16855e-21	4.84967e-22	1.40803e-21	8.40223e-22
2065	6.09112e-22	8.84415e-23	1.93104e-21	7.86266e-22	1.12399e-21	1.15406e-21
2066	8.39732e-22	1.42091e-22	1.60946e-21	5.5807e-22	1.32233e-21	9.68708e-22
2067	1.28394e-21	3.62847e-22	1.31724e-21	4.00304e-22	1.45249e-21	7.79769e-22
2068	1.53238e-21	4.27513e-22	1.45358e-21	3.80875e-22	1.3114e-21	7.61326e-22
2069	1.63736e-21	4.2846e-22	1.57759e-21	3.86185e-22	1.19847e-21	7.8018e-22
2070	1.71341e-21	4.24965e-22	1.71275e-21	3.76906e-22	1.1397e-21	7.8298e-22
2071	1.78471e-21	4.23782e-22	1.82572e-21	3.83573e-22	1.01992e-21	7.7626e-22
2072	1.85332e-21	4.24301e-22	1.98852e-21	3.85025e-22	8.89391e-22	7.56594e-22
2073	1.89747e-21	4.19525e-22	2.14176e-21	3.86208e-22	6.89782e-22	7.74958e-22
2074	1.8715e-21	3.93627e-22	2.34644e-21	4.06371e-22	4.75839e-22	8.15579e-22
2075	1.87558e-21	3.99192e-22	2.4416e-21	3.82808e-22	3.33308e-22	7.84272e-22
2076	1.87259e-21	4.10177e-22	2.55628e-21	3.78142e-22	1.25606e-22	7.63084e-22
2077	1.8129e-21	4.05302e-22	2.71229e-21	3.85787e-22	1.32228e-22	7.67388e-22
2078	1.77316e-21	4.04524e-22	2.88966e-21	3.951e-22	3.51718e-22	7.6579e-22
2079	1.70881e-21	3.9145e-22	3.05577e-21	3.99859e-22	6.09204e-22	7.73707e-22
2080	1.65579e-21	4.15362e-22	3.15044e-21	3.83338e-22	8.62936e-22	7.52838e-22
2081	1.48868e-21	4.06444e-22	3.33697e-21	3.90914e-22	1.26538e-21	7.76895e-22
2082	1.35444e-21	3.98213e-22	3.46556e-21	3.92713e-22	1.45994e-21	7.62388e-22
2083	1.21211e-21	4.0769e-22	3.54517e-21	3.79867e-22	1.73771e-21	7.41804e-22
2084	1.04968e-21	4.07997e-22	3.68811e-21	3.86358e-22	2.02424e-21	7.42395e-22
2085	8.44801e-22	4.04877e-22	3.83495e-21	3.98547e-22	2.22564e-21	7.45842e-22
2086	6.13779e-22	4.03671e-22	4.02576e-21	4.0367e-22	2.46096e-21	7.48267e-22
2087	3.06437e-22	3.60718e-22	4.25829e-21	4.15713e-22	2.71992e-21	8.00406e-22
2088	3.2014e-23	3.48623e-22	4.41745e-21	4.1558e-22	2.88839e-21	7.94669e-22
2089	2.1368e-22	3.6528e-22	4.66135e-21	4.4272e-22	3.02153e-21	7.88331e-22
2090	7.23384e-22	2.03321e-22	5.1837e-21	5.74554e-22	3.2342e-21	8.86898e-22
2091	1.002e-21	2.60153e-22	5.15508e-21	4.57581e-22	3.2191e-21	8.18609e-22
2092	1.17379e-21	3.80818e-22	5.24219e-21	4.11754e-22	3.27667e-21	7.82571e-22
2093	1.50948e-21	3.83324e-22	5.49969e-21	4.07056e-22	3.25107e-21	7.63464e-22
2094	1.90695e-21	3.6977e-22	5.78146e-21	4.1095e-22	3.26315e-21	7.5276e-22
2095	2.386e-21	3.72785e-22	6.18824e-21	4.14124e-22	3.24754e-21	7.69156e-22
2096	2.70006e-21	3.72142e-22	6.49279e-21	4.14098e-22	3.15706e-21	7.65451e-22
2097	3.06279e-21	3.64961e-22	6.82514e-21	4.17592e-22	3.10833e-21	7.79596e-22
2098	3.37893e-21	3.59857e-22	7.13153e-21	4.26702e-22	3.02143e-21	7.58091e-22
2099	3.692e-21	3.59945e-22	7.43319e-21	4.2643e-22	2.94699e-21	7.70656e-22
2100	3.96392e-21	3.52624e-22	7.71257e-21	4.37776e-22	2.83472e-21	7.58571e-22
2101	4.25377e-21	3.44264e-22	7.97309e-21	4.33879e-22	2.70825e-21	7.56739e-22
2102	4.52946e-21	3.59554e-22	8.23151e-21	4.28384e-22	2.68613e-21	7.51155e-22
2103	4.79514e-21	3.5976e-22	8.48191e-21	4.29371e-22	2.62909e-21	7.38747e-22
2104	5.02031e-21	3.58781e-22	8.63627e-21	4.3372e-22	2.59732e-21	7.49843e-22
2105	5.21487e-21	3.5524e-22	8.72414e-21	4.34682e-22	2.5863e-21	7.64801e-22
2106	5.45232e-21	3.45204e-22	8.75969e-21	4.28451e-22	2.56374e-21	7.67393e-22
2107	5.69646e-21	3.36217e-22	8.75848e-21	4.37359e-22	2.62139e-21	7.7704e-22
2108	6.03615e-21	3.43224e-22	8.67378e-21	4.36306e-22	2.73396e-21	7.65411e-22
2109	6.19726e-21	3.35595e-22	8.56775e-21	4.44768e-22	2.89557e-21	7.74441e-22
2110	6.27975e-21	3.25655e-22	8.40798e-21	4.44094e-22	3.09197e-21	7.94287e-22
2111	6.28575e-21	3.29916e-22	8.18668e-21	4.49044e-22	3.33443e-21	7.82115e-22
2112	6.25756e-21	3.33614e-22	7.89794e-21	4.40553e-22	3.566e-21	7.69712e-22
2113	6.2061e-21	3.30007e-22	7.62076e-21	4.48985e-22	3.82314e-21	7.61948e-22
2114	6.18869e-21	2.95526e-22	7.42908e-21	4.77215e-22	4.16996e-21	7.94476e-22
2115	6.20255e-21	2.27995e-22	7.25947e-21	5.21892e-22	4.47867e-21	8.01582e-22
2116	6.08594e-21	2.8205e-22	6.84202e-21	4.62066e-22	4.73643e-21	7.56626e-22
2117	5.94609e-21	3.17398e-22	6.48065e-21	4.52768e-22	4.97562e-21	7.57674e-22
2118	5.83961e-21	3.18455e-22	6.15527e-21	4.47372e-22	5.26438e-21	7.76287e-22
2119	5.70774e-21	3.21187e-22	5.83981e-21	4.5359e-22	5.49831e-21	7.86636e-22
2120	5.55909e-21	3.14721e-22	5.50956e-21	4.51223e-22	5.63932e-21	7.62612e-22
2121	5.37714e-21	3.08718e-22	5.21736e-21	4.54799e-22	5.85633e-21	7.62707e-22
2122	5.14267e-21	3.23493e-22	4.87753e-21	4.60616e-22	6.04932e-21	7.73577e-22
2123	5.02681e-21	3.18972e-22	4.64214e-21	4.56994e-22	6.1613e-21	7.69364e-22
2124	4.9897e-21	3.01934e-22	4.44538e-21	4.59023e-22	6.20859e-21	7.66929e-22
2125	5.04246e-21	3.03052e-22	4.28107e-21	4.61488e-22	6.18429e-21	7.71933e-22
2126	4.82889e-21	3.10366e-22	4.14451e-21	4.58515e-22	6.10682e-21	7.70089e-22
2127	4.30642e-21	3.09575e-22	4.0422e-21	4.56326e-22	6.0363e-21	7.81284e-22
2128	4.06017e-21	3.03453e-22	3.94223e-21	4.52336e-22	5.89147e-21	7.82132e-22
2129	4.11272e-21	3.0134e-22	3.84359e-21	4.53402e-22	5.71143e-21	7.75281e-22
2130	4.14831e-21	2.97222e-22	3.77712e-21	4.67653e-22	5.46797e-21	7.7884e-22
2131	4.02223e-21	2.98712e-22	3.71102e-21	4.79174e-22	5.2028e-21	7.67328e-22
2132	3.75958e-21	3.00827e-22	3.62011e-21	4.84063e-22	4.98078e-21	7.74212e-22
2133	3.40451e-21	2.96668e-22	3.49554e-21	4.81302e-22	4.75798e-21	7.93255e-22
2134	3.0179e-21	2.91951e-22	3.39398e-21	4.81178e-22	4.49628e-21	7.89222e-22
2135	2.52481e-21	2.78618e-22	3.29428e-21	5.01781e-22	4.11282e-21	8.13307e-22
2136	2.37024e-21	2.19293e-22	3.28069e-21	5.46417e-22	3.95098e-21	8.37809e-22
2137	2.20756e-21	2.5794e-22	3.06631e-21	5.11941e-22	3.67788e-21	7.9934e-22
2138	2.16184e-21	2.83001e-22	2.93317e-21	5.05074e-22	3.48612e-21	7.66404e-22
2139	2.2157e-21	2.61751e-22	2.8539e-21	5.21671e-22	3.33437e-21	7.94619e-22
2140	2.28413e-21	2.5659e-22	2.73047e-21	5.09145e-22	3.17859e-21	8.07543e-22
2141	2.35346e-21	2.79425e-22	2.64178e-21	5.0453e-22	3.02119e-21	7.93981e-22
2142	2.44118e-21	2.81368e-22	2.55293e-21	4.97385e-22	2.87967e-21	7.76725e-22
2143	2.53913e-21	2.76083e-22	2.52502e-21	5.03625e-22	2.81813e-21	8.01046e-22
2144	2.62173e-21	2.68876e-22	2.4731e-21	5.0563e-22	2.72786e-21	8.10098e-22
2145	2.65666e-21	2.65247e-22	2.46979e-21	5.17627e-22	2.61867e-21	8.07548e-22
2146	2.7055e-21	2.5985e-22	2.47044e-21	5.35049e-22	2.53032e-21	8.04688e-22
2147	2.73655e-21	2.60553e-22	2.43904e-21	5.30868e-22	2.51449e-21	8.00724e-22
2148	2.73389e-21	2.54182e-22	2.42318e-21	5.29085e-22	2.49495e-21	8.17763e-22
2149	2.73385e-21	2.50839e-22	2.35224e-21	5.32804e-22	2.4249e-21	8.10526e-22
2150	2.7312e-21	2.5579e-22	2.35584e-21	5.45534e-22	2.35517e-21	7.98699e-22
2151	2.77747e-21	2.46384e-22	2.31729e-21	5.47008e-22	2.28516e-21	7.87013e-22
2152	2.79037e-21	2.4158e-22	2.30048e-21	5.59083e-22	2.28692e-21	7.96974e-22
2153	2.76979e-21	2.47354e-22	2.29647e-21	5.63034e-22	2.24858e-21	7.90664e-22
2154	2.7668e-21	2.48724e-22	2.25436e-21	5.54342e-22	2.13983e-21	7.65947e-22
2155	2.76908e-21	2.42969e-22	2.20167e-21	5.52941e-22	2.0829e-21	7.97481e-22
2156	2.72344e-21	2.3948e-22	2.1889e-21	5.76345e-22	1.98348e-21	8.03359e-22
2157	2.68249e-21	2.3245e-22	2.15304e-21	5.70334e-22	1.95378e-21	8.20844e-22
2158	2.597e-21	2.34971e-22	2.17123e-21	5.80614e-22	1.92657e-21	8.35328e-22
2159	2.50391e-21	2.42037e-22	2.1419e-21	5.79954e-22	1.83388e-21	8.34412e-22
2160	2.43316e-21	2.31347e-22	2.1278e-21	5.82044e-22	1.76265e-21	8.13759e-22
2161	2.35092e-21	2.19358e-22	2.12e-21	5.93103e-22	1.69214e-21	8.13157e-22
2162	2.20524e-21	1.97662e-22	2.16735e-21	6.02481e-22	1.62832e-21	8.10906e-22
2163	2.07182e-21	2.11203e-22	2.13449e-21	6.00552e-22	1.6214e-21	8.39183e-22
2164	1.90679e-21	2.16918e-22	2.12848e-21	6.03719e-22	1.56897e-21	8.31891e-22
2165	1.74436e-21	2.16753e-22	2.13076e-21	6.00306e-22	1.48483e-21	8.24129e-22
2166	1.57965e-21	2.15592e-22	2.12676e-21	6.03481e-22	1.46064e-21	8.05426e-22
2167	1.41649e-21	2.15435e-22	2.15535e-21	6.14244e-22	1.49397e-21	8.23091e-22
2168	1.23003e-21	2.10907e-22	2.2182e-21	6.20943e-22	1.50212e-21	8.24001e-22
2169	1.02767e-21	2.11522e-22	2.26749e-21	6.36572e-22	1.49427e-21	8.37029e-22
2170	8.43069e-22	2.09071e-22	2.28593e-21	6.16048e-22	1.47429e-21	8.27801e-22
2171	6.52146e-22	2.07655e-22	2.37276e-21	6.21434e-22	1.44683e-21	8.23111e-22
2172	4.67913e-22	2.05267e-22	2.476e-21	6.40022e-22	1.47993e-21	8.17176e-22
2173	2.70054e-22	2.05897e-22	2.58019e-21	6.47481e-22	1.48623e-21	8.17874e-22
2174	6.76156e-23	2.02826e-22	2.68193e-21	6.37733e-22	1.52401e-21	8.14816e-22
2175	1.34432e-22	2.02933e-22	2.82622e-21	6.49486e-22	1.58885e-21	8.19554e-22
2176	4.09182e-22	1.98075e-22	3.08655e-21	6.69905e-22	1.6671e-21	8.09581e-22
2177	6.1382e-22	1.95373e-22	3.2319e-21	6.69984e-22	1.73165e-21	8.3388e-22
2178	7.71306e-22	1.92485e-22	3.40191e-21	6.80658e-22	1.83024e-21	8.43635e-22
2179	9.13379e-22	1.87124e-22	3.59734e-21	6.84983e-22	1.9346e-21	8.35271e-22
2180	1.07938e-21	1.91832e-22	3.74395e-21	6.82822e-22	1.95799e-21	8.16641e-22
2181	1.1943e-21	1.94472e-22	3.90047e-21	6.87233e-22	1.94587e-21	7.94685e-22
2182	1.25741e-21	1.91622e-22	4.02939e-21	6.89149e-22	2.04204e-21	7.93805e-22
2183	1.2985e-21	1.87835e-22	4.20379e-21	7.03107e-22	2.12197e-21	7.92162e-22
2184	1.3473e-21	1.90145e-22	4.34446e-21	7.0618e-22	2.19938e-21	8.06684e-22
2185	1.36357e-21	1.76535e-22	4.46862e-21	7.13348e-22	2.24799e-21	8.09784e-22
2186	1.33771e-21	1.69885e-22	4.5309e-21	7.17191e-22	2.25524e-21	7.78327e-22
2187	1.30989e-21	1.61549e-22	4.59805e-21	7.30241e-22	2.3312e-21	8.03063e-22
2188	1.29141e-21	1.71412e-22	4.62494e-21	7.27989e-22	2.36998e-21	8.01603e-22
2189	1.24781e-21	1.6605e-22	4.614e-21	7.35319e-22	2.38581e-21	8.07216e-22
2190	1.21988e-21	1.67626e-22	4.56216e-21	7.29628e-22	2.40272e-21	8.10316e-22
2191	1.15691e-21	1.64908e-22	4.48308e-21	7.36833e-22	2.44112e-21	8.04255e-22
2192	1.07105e-21	1.64353e-22	4.3719e-21	7.34455e-22	2.44393e-21	8.08967e-22
2193	9.91052e-22	1.59476e-22	4.28037e-21	7.46312e-22	2.42973e-21	8.25899e-22
2194	9.33528e-22	1.55762e-22	4.13673e-21	7.4363e-22	2.37682e-21	8.20728e-22
2195	8.53499e-22	1.5045e-22	4.00774e-21	7.47414e-22	2.30925e-21	8.10949e-22
2196	8.14374e-22	1.5474e-22	3.86796e-21	7.46031e-22	2.22857e-21	8.11185e-22
2197	7.53374e-22	1.50197e-22	3.74649e-21	7.50193e-22	2.15322e-21	8.04313e-22
2198	7.01782e-22	1.52139e-22	3.57043e-21	7.50597e-22	2.05604e-21	7.94956e-22
2199	6.64256e-22	1.49668e-22	3.45708e-21	7.64122e-22	1.97199e-21	8.17492e-22
2200	6.32913e-22	1.42912e-22	3.35566e-21	7.65486e-22	1.87804e-21	8.05361e-22
2201	5.9055e-22	1.40388e-22	3.22702e-21	7.63849e-22	1.80608e-21	8.16689e-22
2202	5.62462e-22	1.41121e-22	3.12958e-21	7.66019e-22	1.70357e-21	8.20526e-22
2203	5.7452e-22	1.39301e-22	3.00519e-21	7.69991e-22	1.53921e-21	8.05948e-22
2204	5.77308e-22	1.2975e-22	2.94751e-21	7.73739e-22	1.42498e-21	8.23505e-22
2205	5.8586e-22	1.22674e-22	2.91694e-21	7.86825e-22	1.35885e-21	8.55554e-22
2206	6.25563e-22	1.32414e-22	2.90637e-21	7.80021e-22	1.19312e-21	8.15665e-22
2207	6.45635e-22	1.33211e-22	2.91758e-21	7.84249e-22	1.06407e-21	8.2589e-22
2208	6.36226e-22	1.24039e-22	2.98403e-21	7.87299e-22	9.41183e-22	8.18895e-22
2209	6.53896e-22	1.24863e-22	3.03221e-21	7.82136e-22	8.35202e-22	8.15533e-22
2210	7.03241e-22	1.23052e-22	3.13142e-21	7.80344e-22	7.14226e-22	8.30324e-22
2211	7.07015e-22	1.19683e-22	3.26254e-21	7.78283e-22	6.21624e-22	8.44687e-22
2212	7.47843e-22	1.14425e-22	3.38731e-21	7.78653e-22	5.31007e-22	8.39198e-22
2213	8.41984e-22	1.15692e-22	3.58747e-21	7.77771e-22	4.12336e-22	8.2921e-22
2214	9.36772e-22	1.2407e-22	3.83003e-21	7.96955e-22	2.8518e-22	8.26123e-22
2215	1.05139e-21	1.24466e-22	4.03153e-21	7.88983e-22	2.22253e-22	8.56569e-22
2216	1.17059e-21	1.24527e-22	4.37356e-21	7.83375e-22	6.37136e-23	8.45653e-22
2217	1.25022e-21	1.22462e-22	4.59999e-21	7.85827e-22	2.3079e-23	8.74461e-22
2218	1.30404e-21	1.17709e-22	4.81576e-21	7.89459e-22	7.22451e-23	8.50187e-22
2219	1.38961e-21	1.17242e-22	5.03072e-21	7.89619e-22	1.33936e-22	8.57909e-22
2220	1.46637e-21	1.21503e-22	5.21973e-21	7.9317e-22	2.10434e-22	8.76902e-22
2221	1.45912e-21	1.11149e-22	5.38265e-21	7.89041e-22	2.84815e-22	8.77106e-22
2222	1.49015e-21	1.14341e-22	5.56401e-21	7.96066e-22	2.70845e-22	8.96953e-22
2223	1.53196e-21	1.23097e-22	5.73861e-21	7.98256e-22	3.0521e-22	8.72266e-22
2224	1.53974e-21	1.23236e-22	5.86973e-21	7.96498e-22	3.72523e-22	8.71389e-22
2225	1.53799e-21	1.15238e-22	5.98978e-21	7.95907e-22	4.0896e-22	8.8568e-22
2226	1.55014e-21	1.13246e-22	6.07593e-21	7.95731e-22	4.21199e-22	8.8202e-22
2227	1.5258e-21	1.16512e-22	6.01675e-21	7.80716e-22	3.90533e-22	8.83819e-22
2228	1.51621e-21	1.21791e-22	5.8611e-21	7.81798e-22	3.60954e-22	8.83847e-22
2229	1.52011e-21	1.2456e-22	5.6356e-21	7.88124e-22	3.48264e-22	8.91729e-22
2230	1.45828e-21	1.13537e-22	5.18891e-21	7.84333e-22	3.06559e-22	9.14196e-22
2231	1.4566e-21	1.12029e-22	4.85232e-21	7.67272e-22	2.37567e-22	9.20809e-22
2232	1.4465e-21	1.24649e-22	4.56881e-21	7.61174e-22	2.50205e-22	9.08146e-22
2233	1.39514e-21	1.26359e-22	4.26077e-21	7.55492e-22	2.75745e-22	8.91028e-22
2234	1.39713e-21	1.32829e-22	4.00327e-21	7.5977e-22	2.53808e-22	8.64702e-22
2235	1.3345e-21	1.24893e-22	3.73448e-21	7.51791e-22	2.32691e-22	8.71726e-22
2236	1.25745e-21	1.24658e-22	3.43581e-21	7.40424e-22	1.35111e-22	8.83458e-22
2237	1.18401e-21	1.23708e-22	3.16338e-21	7.38062e-22	8.5172e-23	8.89357e-22
2238	1.12338e-21	1.23386e-22	2.91868e-21	7.39058e-22	1.1757e-22	8.87052e-22
2239	1.0686e-21	1.19303e-22	2.74269e-21	7.4444e-22	8.16452e-23	8.83265e-22
2240	1.00567e-21	1.17021e-22	2.57897e-21	7.36574e-22	4.70529e-23	8.71127e-22
2241	9.3214e-22	1.20361e-22	2.46759e-21	7.45242e-22	2.38019e-23	8.77e-22
2242	8.00835e-22	1.10196e-22	2.38487e-21	7.36841e-22	7.12337e-23	9.0024e-22
2243	6.99782e-22	1.15008e-22	2.33857e-21	7.39447e-22	1.81088e-22	9.08776e-22
2244	6.23544e-22	1.05179e-22	2.3075e-21	7.23696e-22	1.36475e-22	8.87315e-22
2245	5.9762e-22	1.07314e-22	2.34928e-21	7.25207e-22	1.70032e-22	9.22058e-22
2246	5.50008e-22	1.04358e-22	2.39261e-21	7.13885e-22	1.52118e-22	9.13469e-22
2247	5.35931e-22	1.07207e-22	2.51932e-21	7.21041e-22	1.07219e-22	8.82109e-22
2248	4.68905e-22	9.64013e-23	2.60398e-21	7.03651e-22	5.69834e-23	8.68079e-22
2249	4.63737e-22	1.08307e-22	2.79485e-21	7.05891e-22	9.57118e-23	8.70981e-22
2250	4.05069e-22	9.59943e-23	2.9664e-21	7.02333e-22	2.21667e-23	8.55513e-22
2251	3.83818e-22	1.07527e-22	3.22276e-21	7.17997e-22	2.09483e-23	8.7365e-22
2252	2.68176e-22	8.86193e-23	3.42677e-21	6.92396e-22	7.14698e-23	8.49264e-22
2253	2.91043e-22	1.00829e-22	3.75789e-21	7.01933e-22	1.03348e-22	8.71519e-22
2254	2.20738e-22	8.53841e-23	4.05756e-21	6.92481e-22	1.72664e-22	8.71009e-22
2255	2.17944e-22	9.39691e-23	4.41218e-21	7.08154e-22	2.19469e-22	8.72188e-22
2256	1.28424e-22	8.7146e-23	4.71888e-21	7.05125e-22	2.56481e-22	8.58105e-22
2257	8.11842e-23	8.03069e-23	5.2343e-21	7.20472e-22	3.41283e-22	8.48813e-22
2258	4.43751e-23	7.76808e-23	5.42921e-21	6.74668e-22	4.84919e-22	8.35144e-22
2259	1.29386e-23	8.1213e-23	5.7597e-21	7.0933e-22	4.20051e-22	8.69689e-22
2260	2.1963e-23	7.79014e-23	5.86149e-21	6.63201e-22	5.18118e-22	8.40015e-22
2261	1.16319e-23	8.79418e-23	6.13541e-21	7.12625e-22	5.15375e-22	8.45294e-22
2262	4.94794e-23	8.64851e-23	6.14414e-21	6.56816e-22	6.44814e-22	8.15157e-22
2263	5.72087e-23	9.38525e-23	6.19475e-21	6.96589e-22	5.47773e-22	8.42813e-22
2264	1.26178e-22	8.60602e-23	6.00887e-21	6.49245e-22	6.42333e-22	8.25903e-22
2265	1.13525e-22	1.07922e-22	5.85848e-21	6.73102e-22	5.63591e-22	8.49094e-22
2266	2.41698e-22	8.58364e-23	5.55578e-21	6.5447e-22	6.45365e-22	8.55776e-22
2267	2.39837e-22	1.09815e-22	5.19422e-21	6.68013e-22	6.28424e-22	8.43997e-22
2268	3.79542e-22	8.3923e-23	4.8314e-21	6.69409e-22	6.59813e-22	8.39546e-22
2269	3.64813e-22	1.15316e-22	4.3712e-21	6.39431e-22	7.13972e-22	8.31595e-22
2270	4.90401e-22	1.06532e-22	3.85101e-21	6.55407e-22	7.00558e-22	8.26859e-22
2271	6.00776e-22	8.62562e-23	3.47173e-21	6.29835e-22	7.99558e-22	7.82484e-22
2272	5.61214e-22	1.24088e-22	3.13202e-21	6.31315e-22	8.26543e-22	7.76122e-22
2273	6.73374e-22	8.90693e-23	2.88256e-21	6.39541e-22	8.41828e-22	7.89238e-22
2274	7.17813e-22	1.08278e-22	2.5522e-21	6.0379e-22	8.72546e-22	7.90263e-22
2275	8.28964e-22	9.98601e-23	2.35054e-21	6.43722e-22	8.61648e-22	7.97178e-22
2276	8.96398e-22	1.03082e-22	2.02415e-21	5.91477e-22	9.90573e-22	7.57328e-22
2277	9.54255e-22	1.1069e-22	1.88393e-21	6.25868e-22	9.35517e-22	7.87044e-22
2278	1.06392e-21	9.99728e-23	1.66231e-21	5.99503e-22	1.05886e-21	7.87723e-22
2279	1.1663e-21	1.01181e-22	1.48677e-21	5.88818e-22	1.14183e-21	7.7324e-22
2280	1.24867e-21	1.01257e-22	1.36912e-21	5.95425e-22	1.19223e-21	7.65711e-22
2281	1.35021e-21	8.85805e-23	1.15043e-21	5.68397e-22	1.22881e-21	7.66619e-22
2282	1.46366e-21	8.56287e-23	1.03097e-21	5.83675e-22	1.16724e-21	7.75993e-22
2283	1.51878e-21	9.73699e-23	8.95715e-22	5.58141e-22	1.21574e-21	7.54999e-22
2284	1.60466e-21	1.00186e-22	7.48783e-22	5.97885e-22	1.17909e-21	7.52766e-22
2285	1.59695e-21	1.35013e-22	5.76903e-22	5.92698e-22	1.16039e-21	7.5014e-22
2286	1.63095e-21	1.49669e-22	4.63251e-22	6.00926e-22	1.07225e-21	7.94034e-22
2287	1.5398e-21	2.35205e-22	3.59623e-22	6.17087e-22	9.95202e-22	8.01409e-22
2288	1.62808e-21	2.02266e-22	2.48165e-22	6.13923e-22	1.00677e-21	7.88399e-22
2289	1.50673e-21	3.25908e-22	2.30754e-22	6.55123e-22	8.92349e-22	8.0329e-22
2290	1.50752e-21	3.33418e-22	9.3627e-23	6.27591e-22	8.75732e-22	7.96852e-22
2291	1.50718e-21	3.61756e-22	7.50536e-23	6.81674e-22	6.79214e-22	8.14051e-22
2292	1.33916e-21	5.14129e-22	1.73624e-22	6.28698e-22	6.51541e-22	7.93201e-22
2293	1.45975e-21	4.30502e-22	9.21901e-23	6.99106e-22	5.05885e-22	8.09625e-22
2294	1.13674e-21	6.93137e-22	1.5582e-22	7.15103e-22	3.13919e-22	8.55381e-22
2295	1.2929e-21	5.56873e-22	3.04651e-22	6.52055e-22	3.2394e-22	8.37679e-22
2296	1.01109e-21	7.79288e-22	1.17559e-22	8.18953e-22	4.49572e-23	9.23119e-22
2297	1.06068e-21	6.87336e-22	3.49736e-22	7.38703e-22	1.19155e-23	8.71793e-22
2298	5.99709e-22	1.04588e-21	3.1423e-22	8.39172e-22	3.96602e-22	9.43486e-22
2299	7.32875e-22	8.66507e-22	6.28125e-22	6.72892e-22	1.61454e-22	8.55661e-22
2300	4.01569e-22	1.12193e-21	2.07358e-22	9.53051e-22	7.56003e-22	9.78424e-22
2301	1.91262e-22	1.19713e-21	7.17512e-22	6.63043e-22	5.09426e-22	8.69591e-22
2302	2.8399e-22	1.10897e-21	1.10063e-22	1.00595e-21	1.01321e-21	1.01019e-21
2303	2.73473e-22	1.46459e-21	6.68932e-22	7.15468e-22	8.16589e-22	9.29439e-22
2304	5.28278e-23	1.17615e-21	1.7006e-22	9.78531e-22	1.21405e-21	1.00744e-21
2305	7.77017e-22	1.76056e-21	4.29897e-22	8.7731e-22	1.38886e-21	1.02168e-21
2306	4.06248e-22	1.40041e-21	2.42229e-22	9.21943e-22	1.43575e-21	1.00133e-21
2307	1.29154e-21	2.08021e-21	5.38268e-23	1.15679e-21	2.06005e-21	1.12001e-21
2308	1.04436e-21	1.74819e-21	4.09254e-22	8.25604e-22	1.54617e-21	9.52875e-22
2309	1.62632e-21	2.22642e-21	5.30999e-22	1.42001e-21	2.58919e-21	1.24433e-21
2310	1.7787e-21	2.17041e-21	5.91823e-22	7.33522e-22	1.67516e-21	9.6049e-22
2311	2.6705e-21	2.80327e-21	6.91706e-23	1.14854e-21	2.56497e-21	1.19734e-21
2312	2.01668e-21	2.1523e-21	1.77035e-22	1.09819e-21	2.42166e-21	1.15104e-21
2313	2.85991e-21	2.82941e-21	4.78137e-22	1.35813e-21	2.96057e-21	1.28374e-21
2314	2.43866e-21	2.34331e-21	9.27919e-23	9.13677e-22	2.26433e-21	1.03147e-21
2315	2.66592e-21	2.57193e-21	7.71865e-22	1.47893e-21	3.01328e-21	1.29504e-21
2316	2.69384e-21	2.45508e-21	2.07811e-22	8.26602e-22	2.33183e-21	1.07723e-21
2317	2.79595e-21	2.65497e-21	1.21902e-21	1.69357e-21	3.46872e-21	1.43179e-21
2318	3.22615e-21	2.84615e-21	2.1438e-22	8.15684e-22	2.38077e-21	1.06132e-21
2319	3.22916e-21	3.02414e-21	1.80426e-21	2.05153e-21	4.01189e-21	1.57638e-21
2320	3.97532e-21	3.34826e-21	4.24172e-22	7.61966e-22	2.43806e-21	1.09317e-21
2321	3.87898e-21	3.44283e-21	2.1654e-21	2.28002e-21	4.38963e-21	1.71329e-21
2322	4.53658e-21	3.69533e-21	4.20277e-22	7.71504e-22	2.28192e-21	1.11581e-21
2323	4.28884e-21	3.67106e-21	2.3494e-21	2.37524e-21	4.37793e-21	1.77866e-21
2324	4.25339e-21	3.42813e-21	1.67504e-21	1.81409e-21	3.76336e-21	1.60598e-21
2325	4.74929e-21	3.90655e-21	2.21274e-23	9.86389e-22	2.16565e-21	1.29907e-21
2326	4.06952e-21	3.34751e-21	1.88379e-21	1.87103e-21	3.63898e-21	1.61441e-21
2327	4.75573e-21	3.97771e-21	8.89847e-23	1.00333e-21	2.08779e-21	1.3171e-21
2328	4.22164e-21	3.51555e-21	2.25233e-21	2.08842e-21	3.66722e-21	1.73575e-21
2329	5.09856e-21	4.21248e-21	1.47334e-22	9.19475e-22	1.63094e-21	1.30246e-21
2330	4.52804e-21	3.75226e-21	2.65939e-21	2.32103e-21	3.8133e-21	1.94158e-21
2331	5.38245e-21	4.38937e-21	4.42856e-22	8.02845e-22	1.24373e-21	1.3089e-21
2332	4.49227e-21	3.80689e-21	2.82182e-21	2.42588e-21	3.60143e-21	1.92525e-21
2333	4.72802e-21	4.00201e-21	3.74018e-22	7.36303e-22	8.54711e-22	1.2057e-21
2334	4.05086e-21	3.64266e-21	2.64288e-21	2.2492e-21	3.10787e-21	1.88396e-21
2335	4.04883e-21	3.5446e-21	1.17091e-22	8.01948e-22	9.34843e-22	1.25946e-21
2336	3.81053e-21	3.70278e-21	2.34273e-21	2.10067e-21	2.58664e-21	1.83428e-21
2337	4.15507e-21	3.8552e-21	8.94838e-22	1.19354e-21	1.67497e-21	1.53428e-21
2338	4.20106e-21	3.94516e-21	2.70974e-22	9.3872e-22	1.29998e-21	1.42929e-21
2339	4.00432e-21	4.05552e-21	3.02694e-21	2.51885e-21	3.66172e-21	2.0582e-21
2340	4.55681e-21	4.34271e-21	1.43087e-21	1.55656e-21	2.79362e-21	1.68018e-21
2341	4.40277e-21	4.44501e-21	1.85146e-21	1.92315e-21	2.93277e-21	1.83762e-21
2342	4.1984e-21	4.17016e-21	2.1954e-21	1.98712e-21	3.31347e-21	1.89193e-21
2343	4.48187e-21	4.47222e-21	6.16896e-22	1.2299e-21	1.77814e-21	1.6167e-21
2344	4.14968e-21	4.23057e-21	2.48388e-21	2.19693e-21	3.217e-21	2.00623e-21
2345	4.47958e-21	4.39451e-21	4.79953e-22	1.07737e-21	1.67208e-21	1.58254e-21
2346	4.18393e-21	4.23222e-21	1.55255e-21	1.60866e-21	2.39961e-21	1.7818e-21
2347	3.51601e-21	3.55608e-21	8.92336e-22	1.07283e-21	1.69334e-21	1.459e-21
2348	3.08318e-21	3.19275e-21	4.55952e-22	7.73083e-22	1.15027e-21	1.25712e-21
2349	2.34397e-21	2.57344e-21	1.27767e-21	1.04295e-21	1.57817e-21	1.35506e-21
2350	3.01617e-21	3.22622e-21	2.10801e-21	1.6425e-21	2.55833e-21	1.67836e-21
2351	3.3488e-21	3.73034e-21	2.47883e-21	2.00577e-21	3.29809e-21	1.8596e-21
2352	3.6414e-21	3.99497e-21	1.67798e-21	1.58562e-21	3.02406e-21	1.80279e-21
2353	3.66521e-21	4.27516e-21	1.50358e-21	1.60887e-21	2.96714e-21	1.90558e-21
2354	3.61337e-21	4.43383e-21	2.51389e-21	2.22919e-21	3.88449e-21	2.12376e-21
2355	4.13987e-21	4.93784e-21	1.38014e-21	1.64685e-21	3.37518e-21	1.99084e-21
2356	4.01197e-21	5.0784e-21	1.4655e-21	1.74008e-21	3.46657e-21	2.0913e-21
2357	3.96977e-21	5.10499e-21	2.35197e-21	2.22468e-21	4.57301e-21	2.31851e-21
2358	4.2655e-21	5.42197e-21	1.5408e-21	1.82761e-21	4.08937e-21	2.21019e-21
2359	4.1018e-21	5.53649e-21	1.27296e-21	1.73492e-21	4.00665e-21	2.26284e-21
2360	3.99699e-21	5.49476e-21	1.9697e-21	2.1018e-21	4.65442e-21	2.33668e-21
2361	3.82143e-21	5.41208e-21	1.49334e-21	1.85776e-21	4.40427e-21	2.2292e-21
2362	3.60007e-21	5.37978e-21	1.0046e-21	1.61572e-21	4.02893e-21	2.15364e-21
2363	3.51945e-21	5.36815e-21	1.35727e-21	1.81046e-21	4.48001e-21	2.28193e-21
2364	3.35879e-21	5.22844e-21	1.43586e-21	1.84201e-21	4.49558e-21	2.25935e-21
2365	3.12401e-21	5.07774e-21	1.19813e-21	1.74842e-21	4.36872e-21	2.14144e-21
2366	2.8951e-21	4.88755e-21	9.52573e-22	1.5863e-21	4.05479e-21	2.04237e-21
2367	2.67228e-21	4.71008e-21	6.58203e-22	1.3861e-21	3.71184e-21	2.00064e-21
2368	2.47015e-21	4.53068e-21	6.11877e-22	1.34024e-21	3.53382e-21	1.87461e-21
2369	2.26903e-21	4.32198e-21	6.16857e-22	1.35482e-21	3.46851e-21	1.81198e-21
2370	2.06853e-21	4.08461e-21	5.62621e-22	1.28428e-21	3.32315e-21	1.70954e-21
2371	1.84201e-21	3.86722e-21	3.62282e-22	1.13877e-21	3.12293e-21	1.63768e-21
2372	1.60674e-21	3.63542e-21	2.05304e-22	1.04171e-21	2.82817e-21	1.53942e-21
2373	1.29064e-21	3.36634e-21	1.35693e-22	9.74454e-22	2.51486e-21	1.42671e-21
2374	1.04931e-21	3.13306e-21	4.72577e-23	9.04046e-22	2.3541e-21	1.34384e-21
2375	7.53111e-22	2.89615e-21	3.90143e-23	8.45696e-22	2.08091e-21	1.23814e-21
2376	4.81861e-22	2.65668e-21	1.37005e-22	7.77241e-22	1.88015e-21	1.16383e-21
2377	2.9435e-22	2.4442e-21	2.47029e-22	7.10338e-22	1.68133e-21	1.1118e-21
2378	1.08211e-23	2.12706e-21	4.60108e-22	6.16885e-22	1.42724e-21	1.06241e-21
2379	2.73548e-22	1.88048e-21	5.4141e-22	5.43989e-22	1.16829e-21	9.91214e-22
2380	5.59038e-22	1.61337e-21	6.48733e-22	4.81125e-22	9.46275e-22	9.34181e-22
2381	8.76372e-22	1.32422e-21	7.8888e-22	4.16353e-22	7.05429e-22	8.59093e-22
2382	1.23028e-21	1.03413e-21	9.12587e-22	3.62552e-22	4.5469e-22	7.95627e-22
2383	1.53762e-21	7.70782e-22	9.84205e-22	3.13931e-22	2.04123e-22	7.5873e-22
2384	1.84509e-21	5.1902e-22	1.08077e-21	2.72085e-22	3.46652e-23	6.95645e-22
2385	2.12329e-21	3.15177e-22	1.1477e-21	2.51362e-22	2.0902e-22	6.84707e-22
2386	2.28738e-21	1.83373e-22	1.21062e-21	2.55382e-22	4.00601e-22	6.23947e-22
2387	2.38731e-21	1.09872e-22	1.2562e-21	2.46158e-22	4.80416e-22	6.09373e-22
2388	2.44991e-21	1.03502e-22	1.29715e-21	2.3946e-22	5.41681e-22	6.25173e-22
2389	2.50544e-21	1.28348e-22	1.34456e-21	2.49805e-22	6.66698e-22	6.06977e-22
2390	2.52942e-21	1.49146e-22	1.40797e-21	2.53539e-22	7.27205e-22	5.96907e-22
2391	2.50184e-21	1.55408e-22	1.42098e-21	2.54486e-22	7.84343e-22	5.66285e-22
2392	2.4284e-21	1.50193e-22	1.42316e-21	2.5496e-22	8.51219e-22	5.52204e-22
2393	2.38053e-21	1.46621e-22	1.42506e-21	2.60756e-22	8.34917e-22	5.45516e-22
2394	2.33541e-21	1.49371e-22	1.41199e-21	2.53227e-22	8.23695e-22	5.51536e-22
2395	2.27042e-21	1.40629e-22	1.41061e-21	2.63824e-22	8.12362e-22	5.43288e-22
2396	2.18697e-21	1.34206e-22	1.43001e-21	2.70446e-22	7.9469e-22	5.21992e-22
2397	2.09708e-21	1.29381e-22	1.40583e-21	2.74703e-22	7.72389e-22	5.14914e-22
2398	2.05414e-21	1.29819e-22	1.35183e-21	2.76093e-22	7.81825e-22	5.04544e-22
2399	2.03024e-21	1.26776e-22	1.3165e-21	2.82945e-22	7.21128e-22	5.03951e-22
2400	1.98665e-21	1.1729e-22	1.25534e-21	2.77261e-22	6.99783e-22	4.93722e-22
2401	1.96036e-21	1.11998e-22	1.19373e-21	2.77342e-22	6.70265e-22	5.00759e-22
2402	1.92404e-21	1.11173e-22	1.11601e-21	2.7832e-22	5.88416e-22	4.91969e-22
2403	1.90744e-21	1.08226e-22	1.0371e-21	2.75908e-22	5.53238e-22	4.50082e-22
2404	1.9195e-21	1.07919e-22	9.75857e-22	2.85756e-22	4.64484e-22	4.55946e-22
2405	1.87099e-21	1.04401e-22	7.73492e-22	2.79261e-22	4.48076e-22	4.58895e-22
2406	1.85986e-21	1.03394e-22	6.57823e-22	2.86126e-22	3.94124e-22	4.71603e-22
2407	1.84026e-21	9.87325e-23	5.41798e-22	2.80068e-22	2.87284e-22	4.67625e-22
2408	1.83382e-21	1.02285e-22	4.51132e-22	3.0046e-22	2.37771e-22	4.5057e-22
2409	1.84065e-21	1.07043e-22	3.58819e-22	3.11251e-22	2.27447e-22	4.42814e-22
2410	1.80709e-21	1.01873e-22	2.37013e-22	3.0256e-22	1.47119e-22	4.59211e-22
2411	1.81037e-21	9.88852e-23	1.32847e-22	2.99373e-22	1.07441e-22	4.65619e-22
2412	1.83158e-21	9.81529e-23	2.39466e-23	2.98352e-22	7.7958e-23	4.66044e-22
2413	1.85002e-21	1.00928e-22	6.62312e-23	2.84127e-22	2.76902e-24	4.68756e-22
2414	1.81878e-21	9.3879e-23	1.22929e-22	2.83852e-22	5.53104e-23	4.71272e-22
2415	1.81562e-21	8.7021e-23	1.23354e-22	2.98129e-22	1.84443e-22	4.75741e-22
2416	1.80491e-21	9.57761e-23	1.39839e-22	2.9866e-22	2.78283e-22	4.85972e-22
2417	1.79286e-21	9.34785e-23	1.43819e-22	2.9546e-22	3.38278e-22	4.97335e-22
2418	1.78874e-21	9.32128e-23	1.17313e-22	3.03558e-22	4.12449e-22	5.3042e-22
2419	1.76543e-21	9.33554e-23	1.64883e-23	2.98292e-22	5.06689e-22	5.63716e-22
2420	1.73211e-21	9.13724e-23	4.88465e-23	2.96263e-22	5.92127e-22	5.68661e-22
2421	1.69937e-21	9.0739e-23	9.7753e-23	2.88435e-22	6.85658e-22	5.71284e-22
2422	1.68442e-21	9.05702e-23	1.68051e-22	2.91481e-22	7.58743e-22	5.52015e-22
2423	1.64427e-21	9.32647e-23	2.09242e-22	2.82136e-22	8.50263e-22	5.60374e-22
2424	1.61488e-21	9.56026e-23	2.5055e-22	2.74071e-22	9.76402e-22	5.68982e-22
2425	1.58024e-21	1.0004e-22	3.3523e-22	2.60948e-22	9.86484e-22	5.76715e-22
2426	1.5543e-21	9.49768e-23	4.29844e-22	2.66117e-22	9.54486e-22	5.83546e-22
2427	1.53731e-21	9.13534e-23	5.03697e-22	2.63665e-22	9.61231e-22	5.70279e-22
2428	1.49422e-21	8.54213e-23	5.78671e-22	2.66135e-22	8.68055e-22	5.66757e-22
2429	1.49129e-21	8.95603e-23	6.26789e-22	2.61166e-22	8.13418e-22	5.66539e-22
2430	1.51004e-21	9.57485e-23	6.97257e-22	2.59147e-22	7.97357e-22	5.58866e-22
2431	1.49937e-21	9.11069e-23	7.26955e-22	2.52437e-22	6.5473e-22	5.61207e-22
2432	1.47838e-21	9.00464e-23	7.98434e-22	2.49104e-22	4.99064e-22	5.72615e-22
2433	1.44284e-21	8.67225e-23	8.79337e-22	2.41848e-22	4.38382e-22	5.50426e-22
2434	1.43221e-21	8.52326e-23	9.32468e-22	2.50056e-22	2.93659e-22	5.59303e-22
2435	1.40962e-21	9.00398e-23	9.89946e-22	2.49288e-22	2.18268e-22	5.52644e-22
2436	1.39112e-21	9.46955e-23	1.09287e-21	2.52714e-22	1.53992e-22	5.23463e-22
2437	1.38577e-21	9.88192e-23	1.17195e-21	2.60601e-22	4.59307e-23	5.13442e-22
2438	1.40895e-21	9.3809e-23	1.24624e-21	2.49013e-22	9.81077e-23	4.92137e-22
2439	1.44806e-21	9.83628e-23	1.33266e-21	2.48894e-22	2.41359e-22	4.91166e-22
2440	1.49309e-21	9.65155e-23	1.4223e-21	2.45421e-22	2.90849e-22	4.9114e-22
2441	1.52787e-21	9.49421e-23	1.52946e-21	2.48402e-22	3.9641e-22	4.70068e-22
2442	1.58248e-21	9.48501e-23	1.62129e-21	2.48834e-22	4.89052e-22	4.65283e-22
2443	1.63316e-21	1.0059e-22	1.67385e-21	2.38889e-22	5.87999e-22	4.7559e-22
2444	1.67386e-21	9.72709e-23	1.73041e-21	2.44832e-22	6.52223e-22	4.61348e-22
2445	1.69332e-21	9.7309e-23	1.79436e-21	2.50433e-22	7.53356e-22	4.59144e-22
2446	1.70227e-21	9.598e-23	1.88804e-21	2.50235e-22	9.46703e-22	4.70406e-22
2447	1.72837e-21	9.5188e-23	1.95067e-21	2.53805e-22	9.76449e-22	4.62563e-22
2448	1.75484e-21	9.53619e-23	1.9724e-21	2.51938e-22	1.00936e-21	4.40068e-22
2449	1.79007e-21	9.73874e-23	1.99682e-21	2.49999e-22	1.04944e-21	4.32029e-22
2450	1.78893e-21	9.54477e-23	2.04735e-21	2.63115e-22	1.04601e-21	4.25395e-22
2451	1.77995e-21	8.5398e-23	2.03185e-21	2.53798e-22	1.10068e-21	4.19588e-22
2452	1.797e-21	8.77184e-23	2.04679e-21	2.56997e-22	1.14941e-21	4.17347e-22
2453	1.82733e-21	9.5327e-23	2.10877e-21	2.68184e-22	1.16731e-21	4.33674e-22
2454	1.82834e-21	9.12797e-23	2.13927e-21	2.5851e-22	1.1383e-21	4.39149e-22
2455	1.85733e-21	9.4987e-23	2.14388e-21	2.58276e-22	1.13489e-21	4.31431e-22
2456	1.8659e-21	9.54117e-23	2.15765e-21	2.57554e-22	1.09615e-21	4.26657e-22
2457	1.84417e-21	9.28311e-23	2.16974e-21	2.59296e-22	1.05579e-21	4.41417e-22
2458	1.83812e-21	8.36244e-23	2.15888e-21	2.56974e-22	1.09125e-21	4.42434e-22
2459	1.83595e-21	8.86304e-23	2.18467e-21	2.6772e-22	1.09806e-21	4.18167e-22
2460	1.83117e-21	8.90048e-23	2.16934e-21	2.65961e-22	1.11788e-21	4.28147e-22
2461	1.8172e-21	8.67528e-23	2.18743e-21	2.75761e-22	1.09239e-21	4.22701e-22
2462	1.80748e-21	8.98029e-23	2.24237e-21	2.92413e-22	1.08435e-21	4.35733e-22
2463	1.81779e-21	9.11382e-23	2.28741e-21	2.91982e-22	1.08446e-21	4.38162e-22
2464	1.81782e-21	9.0371e-23	2.31328e-21	2.97958e-22	1.02742e-21	4.47249e-22
2465	1.7994e-21	8.89709e-23	2.32618e-21	2.95505e-22	1.06561e-21	4.56975e-22
2466	1.82601e-21	8.62655e-23	2.32721e-21	2.92582e-22	1.10484e-21	4.43918e-22
2467	1.82299e-21	8.7375e-23	2.34637e-21	2.95604e-22	1.15759e-21	4.46867e-22
2468	1.85497e-21	8.55525e-23	2.36532e-21	2.90367e-22	1.17287e-21	4.4371e-22
2469	1.89205e-21	7.69119e-23	2.38252e-21	3.09309e-22	1.20601e-21	4.22364e-22
2470	1.93482e-21	7.71318e-23	2.41774e-21	3.03676e-22	1.27685e-21	4.3089e-22
2471	1.97828e-21	7.98204e-23	2.46889e-21	3.0598e-22	1.24035e-21	4.48144e-22
2472	1.99303e-21	8.2071e-23	2.47114e-21	3.15836e-22	1.29482e-21	4.53916e-22
2473	2.03993e-21	8.31229e-23	2.44597e-21	3.193e-22	1.4238e-21	4.72039e-22
2474	2.09572e-21	8.21168e-23	2.43731e-21	3.12548e-22	1.50229e-21	4.46818e-22
2475	2.13744e-21	7.98747e-23	2.43263e-21	3.21069e-22	1.6506e-21	4.4933e-22
2476	2.20466e-21	7.77276e-23	2.46282e-21	3.2511e-22	1.71741e-21	4.79461e-22
2477	2.24582e-21	7.91283e-23	2.4862e-21	3.29492e-22	1.78189e-21	4.8267e-22
2478	2.29767e-21	8.04079e-23	2.52476e-21	3.38115e-22	1.92583e-21	4.56121e-22
2479	2.33293e-21	8.15688e-23	2.53905e-21	3.39458e-22	2.03507e-21	4.57072e-22
2480	2.37288e-21	8.06048e-23	2.56409e-21	3.3648e-22	2.0934e-21	4.72661e-22
2481	2.42143e-21	7.79531e-23	2.57049e-21	3.33404e-22	2.16816e-21	4.89512e-22
2482	2.48966e-21	8.01112e-23	2.55069e-21	3.2769e-22	2.28364e-21	4.82737e-22
2483	2.53653e-21	7.80495e-23	2.58472e-21	3.49533e-22	2.35259e-21	5.04691e-22
2484	2.57909e-21	7.88559e-23	2.55991e-21	3.42773e-22	2.44492e-21	5.13577e-22
2485	2.56329e-21	8.31999e-23	2.53851e-21	3.35346e-22	2.54164e-21	4.98136e-22
2486	2.60334e-21	8.41247e-23	2.52472e-21	3.31941e-22	2.58554e-21	5.18384e-22
2487	2.63804e-21	8.15924e-23	2.5273e-21	3.35216e-22	2.65638e-21	5.2416e-22
2488	2.6461e-21	8.17826e-23	2.53111e-21	3.43077e-22	2.68189e-21	5.40923e-22
2489	2.66119e-21	7.80692e-23	2.57671e-21	3.4463e-22	2.76283e-21	5.35938e-22
2490	2.67389e-21	7.73532e-23	2.58826e-21	3.4146e-22	2.81268e-21	5.55405e-22
2491	2.67869e-21	8.04063e-23	2.58315e-21	3.36739e-22	2.86371e-21	5.4097e-22
2492	2.72439e-21	7.54118e-23	2.58537e-21	3.32017e-22	2.88908e-21	5.52114e-22
2493	2.71051e-21	7.73829e-23	2.58801e-21	3.30801e-22	2.93399e-21	5.69016e-22
2494	2.71784e-21	7.58029e-23	2.5909e-21	3.28705e-22	2.90065e-21	5.90076e-22
2495	2.71536e-21	7.67309e-23	2.62611e-21	3.34836e-22	2.91608e-21	5.79823e-22
2496	2.70074e-21	7.96574e-23	2.63589e-21	3.44348e-22	2.90733e-21	5.80096e-22
2497	2.70607e-21	7.83032e-23	2.62603e-21	3.31551e-22	2.87976e-21	5.84566e-22
2498	2.71395e-21	7.94305e-23	2.61221e-21	3.32962e-22	2.90127e-21	5.80085e-22
2499	2.68535e-21	8.85622e-23	2.59249e-21	3.36038e-22	2.89853e-21	5.82194e-22
2500	2.69115e-21	8.54927e-23	2.57068e-21	3.2977e-22	2.94389e-21	5.7195e-22
2501	2.66047e-21	8.79315e-23	2.56844e-21	3.30757e-22	2.87488e-21	6.036e-22
2502	2.63888e-21	9.02839e-23	2.55503e-21	3.35073e-22	2.86804e-21	6.19541e-22
2503	2.63401e-21	8.64037e-23	2.51208e-21	3.32127e-22	2.86913e-21	6.12532e-22
2504	2.63238e-21	8.90035e-23	2.48639e-21	3.36017e-22	2.86339e-21	6.05285e-22
2505	2.62051e-21	8.7951e-23	2.41632e-21	3.36253e-22	2.88483e-21	6.03917e-22
2506	2.62999e-21	8.66534e-23	2.35223e-21	3.3138e-22	2.93947e-21	5.95177e-22
2507	2.64296e-21	8.67458e-23	2.2944e-21	3.31224e-22	2.92694e-21	6.12427e-22
2508	2.628e-21	8.62583e-23	2.22063e-21	3.19756e-22	2.93575e-21	6.23117e-22
2509	2.61663e-21	9.02316e-23	2.16921e-21	3.2669e-22	2.93789e-21	6.23582e-22
2510	2.6504e-21	7.91178e-23	2.09293e-21	3.28893e-22	2.95825e-21	6.15859e-22
2511	2.61751e-21	8.53036e-23	2.03052e-21	3.24172e-22	2.9903e-21	6.12974e-22
2512	2.60223e-21	9.10835e-23	1.99723e-21	3.35554e-22	3.04853e-21	6.2377e-22
2513	2.62443e-21	8.14296e-23	1.86639e-21	3.10264e-22	3.05515e-21	6.3025e-22
2514	2.65154e-21	8.31512e-23	1.81254e-21	3.19283e-22	3.10197e-21	6.10653e-22
2515	2.66462e-21	8.80099e-23	1.797e-21	3.2741e-22	3.11022e-21	6.31536e-22
2516	2.66522e-21	9.14497e-23	1.74521e-21	3.25137e-22	3.11997e-21	6.22651e-22
[truncated: 584 more rows]
